# Supplementary material for: Spatiotemporal changes in chlorophyll-a concentration in China's lakes and its driving factors
Source: Royal Society of Chemistry journal article supplement (doi:10.1039/d4em00731j), 2025-01-01
Supplement: d4em00731j1.xlsx [file d4em00731j1.xlsx]

## Sheet: S1
Number	Longitude	Latitude	Chla(µg/L)
1	106.658	26.5432	27.5
2	82.9999	44.8346	5.15
3	85.7543	45.9081	4.16667
4	118.734	34.4026	9.875
5	115.223	39.2978	1.019
6	122.436	37.0287	1822
7	87.6386	44.1992	15.588
8	107.513	35.6974	7.5
9	113.16	33.7429	8
10	119.093	36.6139	3.30105
11	115.457	30.6029	1.51167
12	119.157	33.2011	765.335
13	115.136	23.1038	870
14	114.304	23.8295	1645
15	113.301	34.2783	1
16	121.262	29.1969	1
17	85.3673	46.1533	3.35
18	115.956	38.9064	2.62725
19	103.308	24.0753	6.75758
20	106.526	26.6557	1875.33
21	113.855	29.1651	2710
22	113.593	32.9809	4.41667
23	113.898	32.6741	7.33333
24	115.468	22.7913	7.6
25	102.935	25.0359	9.625
26	114.73	30.2381	17.7208
27	111.465	21.7528	2343.33
28	98.0373	39.6591	947.5
29	99.2192	25.2546	2.85833
30	103.662	25.6416	2229
31	103.632	25.085	3.14
32	114.198	30.5248	1200
33	117.673	47.9167	10.96
34	100.066	23.7182	14.625
35	86.85	41.8833	4.79784
36	117.12	30.8166	2.17167
37	122.016	30.0567	34.4667
38	121.851	46.3294	1.61905
39	114.57	30.6866	10.75
40	120.452	36.9561	1500
41	117.379	31.5559	28.0818
42	115.412	23.2093	13.1167
43	115.376	23.1834	19.15
44	120.412	29.592	4.28833
45	122.113	30.0503	13.4083
46	118.285	32.3331	4.32083
47	100.67	26.5449	7.94737
48	97.4029	40.1326	5
49	115.384	22.809	3.01667
50	115.447	22.8392	5.97583
51	109.712	18.4301	4.07
52	109.265	19.6025	6.31667
53	99.9507	26.163	2.13333
54	109.714	23.3881	300
55	116.677	43.3654	2357.5
56	122.176	29.6993	28.5833
57	121.382	29.1208	1.93
58	104.044	24.8669	7.12
59	109.01	18.9958	4.21111
60	102.779	24.5495	8.16667
61	115.381	22.7287	2.8
62	124.117	41.8882	4.20161
63	113.558	22.303	2.99958
64	116.869	38.1171	2.355
65	103.775	27.4234	309.964
66	109.247	18.4343	3.65667
67	117.031	36.6812	10.2612
68	104.866	27.4675	223
69	125.162	46.8188	6.01417
70	86.0212	44.4393	18.6667
71	115.798	30.5271	243.333
72	108.297	22.5766	6.4125
73	115.155	30.0999	14.8875
74	112.7	40.5785	6.53
75	111.035	32.7598	1.60385
76	94.3388	39.9575	5
77	115.006	30.8753	1966.67
78	119.11	32.4177	8.97667
79	102.658	25.0131	171.292
80	102.714	24.8509	57.9896
81	121.334	28.9962	6.926
82	120.896	31.1213	9.92295
83	85.1263	45.7249	3.15
84	125.103	46.6084	5.49567
85	104.018	24.9306	5.11
86	121.189	28.9984	16.1
87	113.264	25.9535	2.18528
88	116.221	35.9401	7.22583
89	121.665	29.7687	2.77083
90	114.295	36.415	81.4223
91	110.352	20.0405	15.7833
92	119.273	25.7063	2947
93	118.949	25.4885	1747.67
94	117.218	31.8928	9.61625
95	113.022	29.1263	1.98075
96	118.317	39.7751	5
97	119.784	35.7688	1734
98	104.126	25.3353	1.25017
99	80.745	40.6983	2.605
100	100.168	25.8589	6.55379
101	124.875	43.2849	9.96154
102	101.825	26.7722	5.28438
103	121.341	28.298	10.8067
104	102.524	24.4166	29.6458
105	113.195	23.717	1420
106	118.246	29.9271	9.08083
107	85.6878	46.2082	2.95
108	115.402	24.4688	27.0278
109	119.269	35.7213	2700
110	117.61	32.686	6.64167
111	121.177	28.5454	4.23833
112	116.231	31.2984	2.178
113	114.848	31.2861	1.525
114	109.955	19.8215	3.60588
115	102.852	24.5951	2.17354
116	114.221	30.0558	9.55667
117	114.72	29.6676	16.025
118	113.923	38.3202	7.50469
119	118.748	30.946	3.25
120	121.523	37.2853	1.23
121	108.739	19.0812	12.2167
122	117.185	32.6555	15.3458
123	119.162	32.7734	11.5502
124	119.839	31.6814	13.4167
125	110.914	30.443	1.81583
126	115.429	23.0883	4.85
127	103.921	30.1972	2268.22
128	116.343	37.4293	9.7
129	113.077	33.4803	9.25
130	118.795	26.6997	1470
131	116.845	31.0225	2.13417
132	118.938	31.2884	22.1667
133	111.276	34.2112	2.41667
134	122.231	37.4066	2710
135	114.209	22.7378	2010
136	117.604	35.8596	2115
137	122.147	37.3042	1975
138	131.189	45.4636	4.41667
139	110.983	40.6086	54.212
140	99.9988	26.3021	5.18333
141	115.401	22.7839	2.35
142	110.326	21.8642	2120
143	120.478	29.2419	5.43667
144	115.617	37.619	2172.73
145	110.354	20.0118	12.3333
146	106.444	26.5482	2029.32
147	115.316	23.0508	3.25
148	109.905	39.0975	1230
149	114.647	30.4113	1410
150	111.343	40.7912	3.585
151	125.246	46.6416	5.52833
152	119.73	42.6954	3.15125
153	106.999	25.1418	5.8
154	102.892	38.4057	18.75
155	87.6265	43.721	1.915
156	115.174	22.9005	5.925
157	122.088	30.0584	8.04167
158	105.946	26.2613	2973.33
159	121.207	29.0475	4.745
160	119.26	29.0146	3.65167
161	113.368	29.8661	3.02385
162	118.723	33.1475	12.4549
163	114.107	30.4817	16.9167
164	114.311	30.7161	20.1167
165	122.39	37.2165	1785.83
166	117.724	49.1119	55.647
167	110.291	21.1508	1423
168	121.428	28.3648	16.6625
169	118.856	28.6805	1.8425
170	110.724	19.9533	17.1833
171	116.205	30.51	2.33083
172	121.46	28.4155	3.39667
173	115.67	30.4664	238.333
174	106.909	31.908	2720
175	121.884	30.0565	26.0467
176	114.291	30.6027	2200
177	114.284	38.2711	9.67667
178	103.584	25.2295	1.42
179	103.973	30.1767	2661.33
180	113.559	29.7241	20.2957
181	117.003	23.4474	2233.33
182	121.149	29.2295	4.93833
183	110.536	32.6704	1.71542
184	118.909	28.8381	1.90667
185	102.743	37.5683	1.66667
186	114.436	22.8752	1035
187	122.468	30.7175	23.7833
188	87.4629	46.9332	1.75
189	119.647	35.8191	1740
190	120.228	36.3706	2273.33
191	86.142	44.4488	7
192	113.58	34.6914	4
193	115.941	22.9506	3.5
194	99.9402	26.4894	7.48333
195	121.303	28.5515	8.91167
196	97.9038	24.0595	0.996083
197	98.8583	39.9381	5
198	102.238	38.5101	9.2125
199	117.803	35.9538	2146.25
200	119.894	29.5012	4.095
201	114.582	31.3199	796
202	111.556	22.6844	450
203	112.141	22.2342	268
204	117.17	36.5159	4.62583
205	128.992	43.9118	3.10417
206	112.563	23.2313	12.0992
207	87.061	48.8326	4.3
208	82.4654	41.7587	8.8725
209	106.547	35.5497	287.917
210	122.206	37.1403	2913
211	109.811	40.7793	6.66273
212	104.834	27.4664	963
213	121.211	28.1552	12.46
214	120.731	29.0692	5.47583
215	124.213	46.7823	6.0975
216	129.741	45.3191	3.35417
217	114.499	30.2449	6.39817
218	114.396	37.4481	0.4335
219	115.547	22.9813	1.35
220	103.281	35.8711	8.34167
221	113.781	23.7519	1033
222	115.353	22.8077	7.60833
223	110.322	23.2091	300
224	118.931	28.6117	2.1125
225	116.151	29.9365	3.36333
226	116.724	31.3133	2.42958
227	115.278	39.1265	1.34333
228	119.148	28.0718	6.395
229	115.342	22.8242	3.55
230	104.285	24.8869	1.32
231	121.348	28.2115	13.5467
232	122.313	30.0074	13.4817
233	100.79	27.7091	2
234	114.268	30.2117	15.8333
235	112.164	34.1809	2.16667
236	114.049	29.6944	11.3125
237	121.548	29.0587	6.505
238	122.212	30.3167	12.3033
239	118.145	34.0442	0.757833
240	110.082	32.1666	1914.44
241	114.214	30.7549	2700
242	98.6064	24.4157	0.80725
243	103.354	26.31	2.94
244	111.542	21.8045	2220
245	110.852	32.5619	2103.53
246	114.319	31.2134	2266.67
247	115.859	31.679	2.18229
248	113.987	23.6079	1262.5
249	121.201	37.4331	2.29
250	100.861	22.5075	0.928833
251	97.8479	24.0553	1.15675
252	121.936	37.2066	2426.62
253	116.527	24.7584	1810
254	127.683	44.3944	5.4
255	116.362	31.2313	2.2025
256	85.9752	44.4168	92.6667
257	121.795	43.5335	1.78111
258	100.994	22.6002	3.83333
259	120.697	37.0998	3
260	104.161	23.4085	0.725
261	108.089	22.0717	1432.5
262	100.985	22.806	2.17583
263	115.453	22.8457	5.35
264	114.433	29.7153	1223.33
265	115.588	23.3435	2.425
266	110.07	40.5634	50.5383
267	120.767	30.759	14.1208
268	110.368	19.5014	3.175
269	115.495	23.1515	6.66667
270	120.604	29.4161	4.52
271	121.905	30.0117	3.66
272	116.707	35.1889	6.31867
273	114.01	32.1209	11.8483
274	119	31.114	5.20708
275	102.524	37.7989	1.33333
276	124.732	48.9253	4.02042
277	115.373	31.7746	13.0833
278	103.321	23.4211	6.11775
279	103.817	25.6383	0.869
280	115.615	23.1335	7.975
281	110.17	19.0153	4.98333
282	121.279	28.8528	4.76818
283	121.279	28.8528	5
284	120.242	36.4298	1984
285	118.108	32.9824	5.78333
286	119.742	28.191	2.42747
287	110.167	32.2204	1
288	103.929	25.9718	1.28
289	115.159	22.8601	5.6
290	113.474	23.094	111.35
291	120.758	37.7429	3.01167
292	114.946	31.7782	9.68083
293	116.373	28.9494	2.43657
294	104.131	24.1353	1.7
295	113.924	23.668	1236.67
296	118.006	29.9917	11.5075
297	102.779	24.1603	105.603
298	81.1764	43.8454	1.86667
299	118.975	29.5521	4.53333
300	115.419	22.739	5.4
301	113.225	22.1969	3.40786
302	87.5566	44.1222	101.028
303	103.883	30.3239	2008
304	115.307	23.0081	4.175
305	117.628	30.1435	689.9
306	110.206	25.5244	515.117
307	114.558	30.5707	2450
308	116.24	24.2169	1883.75
309	103.117	25.5989	2.16667
310	98.765	24.7781	0.233
311	117.084	37.1698	6.05
312	101.056	22.8274	2.15167
313	102.31	27.8248	1383.67
314	118.156	40.0089	5
315	116.362	23.186	2260.75
316	84.9711	44.5041	2.525
317	117.002	36.7678	3.04583
318	114.206	30.7214	2200
319	81.1725	44.6175	4.224
320	104.28	30.3086	1802.7
321	116.164	23.2606	550
322	111.208	34.8081	3.66667
323	85.0857	45.6347	3.4
324	114.772	30.3412	710
325	115.667	23.089	2.625
326	118.623	42.3683	19.1659
327	102.421	35.1123	1
328	115.318	28.1043	4.03333
329	119.486	28.9854	4.54778
330	114.565	22.8563	1022.33
331	118.438	25.2051	1907.17
332	124.472	43.0649	10.7083
333	119.322	26.3744	2355
334	120.058	27.6759	1.64545
335	122.112	29.7768	5.33333
336	80.717	40.4411	2.765
337	114.984	30.8445	2700
338	119.278	28.9853	3.70583
339	119.345	28.9399	12.5667
340	117.074	30.4047	1.57458
341	80.7924	41.4721	7.35
342	122.283	30.0075	9.275
343	93.7164	43.0617	3.5
344	119.681	40.0532	17.2222
345	118.857	31.4649	14.8066
346	118.848	34.7865	12.0467
347	104.268	30.204	2100
348	109.116	19.2513	2.75556
349	113.552	33.2695	8.66667
350	121.227	28.1458	9.94
351	110.91	28.5379	7.93875
352	115.408	22.8965	4.8
353	120.473	36.3729	1952
354	114.384	32.0144	10.6833
355	125.763	43.9723	29.7917
356	119.427	32.4137	16.8333
357	121.265	28.1	26.1991
358	96.3521	40.5568	5
359	104.413	29.4941	1823.61
360	103.949	25.3107	1.06258
361	109.482	18.3572	4.1075
362	115.408	22.8965	4.2
363	126.708	43.721	5.98667
364	129.551	46.3331	6.88482
365	102.801	25.1559	9.16667
366	109.569	19.3987	2.64
367	120.437	36.4699	1912
368	113.526	32.7631	5.41667
369	114.254	32.9898	56.75
370	105.057	24.7872	2730
371	122.298	37.2881	2280
372	119.164	32.4595	15.5
373	112.59	30.7139	2900
374	120.145	31.4093	18.6875
375	121.245	28.4942	6.40167
376	118.026	30.3743	5.96972
377	117.091	26.8628	2383.25
378	109.482	18.3572	26.1
379	116.251	23.2164	625
380	120.766	29.8222	5.45075
381	114.394	30.4108	24.1667
382	110.919	33.139	0.523
383	88.0738	44.1091	0.722667
384	104.248	30.1346	2017.33
385	114.186	23.7961	1694.17
386	115.631	31.0914	453.25
387	119.904	35.9361	1778
388	118.947	29.1372	11.8383
389	121.53	28.7991	10.55
390	132.683	46.1101	4.16667
391	76.363	39.7683	0.01
392	109.482	18.3572	4.41667
393	116.876	32.5475	4.16
394	114.548	30.792	2700
395	122.312	37.0888	1745.83
396	118.691	28.6382	4.72333
397	110.317	18.7891	3.45294
398	114.486	38.7546	1.136
399	120.612	36.4797	1928
400	109.098	36.9064	1.58883
401	114.841	29.7959	12.1871
402	115.341	29.866	15.0571
403	114.758	31.204	424
404	112.794	31.3916	2700
405	105.492	32.034	2386.67
406	116.365	23.6709	1350
407	116.991	36.491	4.19417
408	130.344	47.2221	3.28571
409	87.608	43.6637	1.47833
410	108.889	40.9569	8.19562
411	87.2922	47.2958	6.22727
412	126.228	48.7328	19.25
413	127.121	44.5038	19.9111
414	130.116	47.3597	3
415	103.493	23.2321	1533.33
416	115.819	23.0197	7.2
417	114.726	30.4528	707
418	111.465	40.7783	2.635
419	114.662	31.8321	13.1333
420	116.688	30.2729	2.24417
421	109.663	22.7157	300
422	120.696	28.8698	1.4
423	114.788	38.761	1.15
424	105.667	31.5555	5.13646
425	103.729	25.5952	10.8892
426	117.858	29.659	43.7536
427	84.8595	45.5735	3.375
428	109.189	22.6566	1.64
429	114.08	29.954	46.68
430	118.735	34.5384	9.15
431	121.201	28.5315	10.3133
432	102.235	37.9331	1.16667
433	121.429	28.8128	11.1
434	100.995	22.7875	2.96417
435	130.302	47.5314	3
436	118.565	28.4705	6.0625
437	119.459	36.4347	4.54242
438	120.402	28.6416	1.51667
439	114.994	22.8732	4.5
440	124.517	43.1546	12.075
441	114.49	31.0835	2600
442	114.804	27.7327	0.654583
443	116.17	31.5581	2.22317
444	104.172	25.7013	0.657
445	115.819	22.8549	1.1
446	115.896	23.0576	4.5
447	122.524	37.2187	1750
448	103.752	25.4527	8.655
449	121.171	28.0931	13.3067
450	122.195	30.2589	12.775
451	112.055	35.0629	4.94361
452	121.377	28.2704	5.13167
453	115.033	22.7853	6.95
454	132.383	45.3586	5.875
455	114.538	23.8725	24.3056
456	115.54	23.2671	2.85
457	125.362	43.6586	24.3458
458	130.2	47.2844	3
459	116.301	23.6812	1075
460	100.968	22.7204	1.6775
461	112.493	23.084	26.7063
462	102.79	24.3429	63.2275
463	132.044	45.2634	5.64583
464	113.635	31.5939	3.72
465	118.8	32.0786	35.9583
466	112.645	33.3595	2.16667
467	117.363	35.2266	1470
468	120.802	31.4347	18.5917
469	103.019	24.9342	13.0556
470	113.574	22.3319	3.38375
471	125.352	42.9084	5.96667
472	120.184	28.893	7.83333
473	119.228	40.0112	11.4167
474	109.691	19.602	9.1
475	115.007	22.914	4.25
476	122.133	37.3699	2347.5
477	102.558	23.6814	1608.33
478	113.16	23.5493	2670
479	113.216	23.6178	2000
480	104.853	27.4443	234.5
481	103.665	27.2359	2062.35
482	103.614	25.1455	5.01
483	104.21	28.0823	2280
484	115.458	22.8063	4.05
485	117.559	40.0444	16.7
486	103.556	27.4413	1157.57
487	116.814	36.6602	2.87467
488	121.221	28.1319	7.064
489	98.8695	39.8763	5
490	119.641	28.8398	1.49575
491	114.315	31.1095	1500
492	124.027	45.7105	9.33458
493	94.6835	40.0996	5
494	114.178	36.2991	48.387
495	117.151	34.2466	8.66667
496	104.045	24.6695	14.5467
497	105.066	27.8644	1728.5
498	110.777	34.3711	4.08333
499	120.85	37.7634	3.1
500	114.712	30.6751	3.95
501	112.362	30.6166	401.667
502	110.714	32.6281	2323.75
503	114.145	36.093	15.9917
504	112.083	30.9662	1.24348
505	119.527	31.5723	26.75
506	104.626	29.6094	1081.42
507	112.47	30.5148	7.24118
508	121.13	27.8296	3.5
509	122.456	30.7297	19.6667
510	121.072	28.6105	8.25833
511	120.999	29.437	2.79933
512	112.738	33.7452	6.41667
513	115.48	29.2025	2.31458
514	116.315	23.0858	1333.33
515	119.373	29.3885	1430.83
516	100.171	24.1465	6.15875
517	117.691	34.9528	1220.83
518	114.57	30.7593	2633.33
519	114.179	37.0366	0.335
520	113.525	22.211	2.57375
521	113.309	22.3549	2.04875
522	120.044	36.2508	816.667
523	103.596	31.0278	1015.74
524	102.687	25.1257	10.6667
