# Supplementary material for: Spatiotemporal changes in chlorophyll-a concentration in China's lakes and its driving factors
Source: Royal Society of Chemistry journal article supplement (doi:10.1039/d4em00731j), 2025-01-01
Supplement: d4em00731j2.xlsx [file d4em00731j2.xlsx]

## Sheet: S2
LakeName	Data	Chla（µg/L）
BailianheR	201201	0.4
BailianheR	201202	0.66
BailianheR	201203	0.47
BailianheR	201204	0.57
BailianheR	201205	0.6
BailianheR	201206	0.57
BailianheR	201207	0.56
BailianheR	201208	0.52
BailianheR	201209	0.6
BailianheR	201210	0.55
BailianheR	201211	0.46
BailianheR	201212	0.48
BailianheR	201401	0.46
BailianheR	201402	0.46
BailianheR	201403	0.45
BailianheR	201404	0.46
BailianheR	201405	0.36
BailianheR	201406	0.44
BailianheR	201407	1.23
BailianheR	201408	1.33
BailianheR	201409	6.54
BailianheR	201410	3.33
BailianheR	201411	2.78
BailianheR	201412	0.3
BailianheR	201501	1.3
BailianheR	201502	1.8
BailianheR	201503	6.17
BailianheR	201504	0.7
BailianheR	201505	2.7
BailianheR	201506	0.7
BailianheR	201507	2.7
BailianheR	201508	4.8
BailianheR	201509	10.5
BailianheR	201510	4.6
BailianheR	201511	3.1
BailianheR	201512	1.4
BailianheR	201601	1.2
BailianheR	201602	1.7
BailianheR	201603	5.25
BailianheR	201604	4.45
BailianheR	201605	6.04
BailianheR	201606	5.73
BailianheR	201609	8
CaiziL	201201	4.04
CaiziL	201202	2.28
CaiziL	201203	1.46
CaiziL	201204	2.24
CaiziL	201205	2.12
CaiziL	201206	2.3
CaiziL	201207	3.07
CaiziL	201208	5.9
CaiziL	201209	4.09
CaiziL	201210	2.63
CaiziL	201211	4.25
CaiziL	201212	2.14
CaiziL	201401	1.71
CaiziL	201402	1.56
CaiziL	201403	2.21
CaiziL	201404	4.04
CaiziL	201405	2.02
CaiziL	201406	2.09
CaiziL	201407	1.89
CaiziL	201408	2.33
CaiziL	201409	1.7
CaiziL	201410	2.02
CaiziL	201411	2.13
CaiziL	201412	2.36
CaiziL	201501	1.19
CaiziL	201502	2.32
CaiziL	201503	1.88
CaiziL	201504	2.66
CaiziL	201505	2.86
CaiziL	201506	1.88
CaiziL	201507	2.12
CaiziL	201508	2.31
CaiziL	201509	2.72
CaiziL	201510	4.97
CaiziL	201511	6.34
CaiziL	201512	8.14
CaiziL	201601	4.24
CaiziL	201602	1.74
CaiziL	201603	1.16
CaiziL	201604	1.73
CaiziL	201605	1.29
CaiziL	201606	1.6
CaiziL	201607	1.81
CaiziL	201608	2.09
CaiziL	201609	1.77
CaiziL	201610	1.806
CaiziL	201611	1.767
CaiziL	201612	2.138
Chenghai	201201	11
Chenghai	201202	16
Chenghai	201203	12
Chenghai	201204	8
Chenghai	201205	8
Chenghai	201206	8
Chenghai	201207	6
Chenghai	201208	5
Chenghai	201209	6
Chenghai	201210	6
Chenghai	201211	8
Chenghai	201212	6
Chenghai	201401	11
Chenghai	201402	11
Chenghai	201403	11
Chenghai	201404	10
Chenghai	201405	15
Chenghai	201406	4
Chenghai	201407	7
Chenghai	201408	6
Chenghai	201409	6
Chenghai	201410	5
Chenghai	201411	5
Chenghai	201412	5
Chenghai	201501	13
Chenghai	201502	11
Chenghai	201503	7
Chenghai	201504	7
Chenghai	201505	0.5
Chenghai	201506	2
Chenghai	201507	1
Chenghai	201508	2.8
Chenghai	201509	4
Chenghai	201510	3
Chenghai	201511	2
Chenghai	201512	6
Chenghai	201601	3
Chenghai	201602	7
Chenghai	201603	3
Chenghai	201604	7
Chenghai	201605	8
Chenghai	201606	7
Chenghai	201607	5
Chenghai	201608	4
Chenghai	201609	4
Chenghai	201610	5
Chenghai	201611	5
Chenghai	201612	5
DianshanL	201201	1.12
DianshanL	201202	5.42
DianshanL	201203	6.9
DianshanL	201204	17.6
DianshanL	201205	2.68
DianshanL	201206	4.83
DianshanL	201207	11.5
DianshanL	201208	4.64
DianshanL	201209	4.22
DianshanL	201210	11.1
DianshanL	201211	4.17
DianshanL	201212	5.49
DianshanL	201401	3.9
DianshanL	201402	3.94
DianshanL	201403	3.33
DianshanL	201404	3.98
DianshanL	201405	5.53
DianshanL	201406	3.98
DianshanL	201407	8.15
DianshanL	201408	21
DianshanL	201409	2.48
DianshanL	201410	4.02
DianshanL	201411	6.16
DianshanL	201412	2.75
DianshanL	201501	10.5
DianshanL	201502	5
DianshanL	201503	7.3
DianshanL	201504	6.1
DianshanL	201505	14.6
DianshanL	201506	5.1
DianshanL	201507	4.4
DianshanL	201508	10.8
DianshanL	201509	16
DianshanL	201510	6.2
DianshanL	201511	4.9
DianshanL	201601	11.8
DianshanL	201602	6.43
DianshanL	201603	12.5
DianshanL	201604	12.1
DianshanL	201605	14.2
DianshanL	201606	6.24
DianshanL	201607	14.8
DianshanL	201608	18.9
DianshanL	201609	22.8
DianshanL	201610	4.87
DianshanL	201611	11.2
DianshanL	201612	4.2
DongjiangR	201208	3.21
DongjiangR	201209	3.195
DongjiangR	201210	3.25
DongjiangR	201211	3.305
DongjiangR	201212	3.305
DongjiangR	201401	3.1
DongjiangR	201402	2.905
DongjiangR	201403	2.56667
DongjiangR	201404	2.17667
DongjiangR	201405	1.81333
DongjiangR	201406	1.575
DongjiangR	201407	2.22833
DongjiangR	201408	1.92333
DongjiangR	201409	1.92833
DongjiangR	201410	1.885
DongjiangR	201411	2.1
DongjiangR	201412	2.02167
DongjiangR	201501	2.46
DongjiangR	201502	2.4733
DongjiangR	201503	1.9783
DongjiangR	201504	1.98
DongjiangR	201505	2.05835
DongjiangR	201506	2.63165
DongjiangR	201507	2.19335
DongjiangR	201508	1.99
DongjiangR	201509	2.20835
DongjiangR	201510	2.3083
DongjiangR	201511	2.41835
DongjiangR	201512	2.26835
DongjiangR	201601	2.3965
DongjiangR	201602	2.157
DongjiangR	201603	2.1465
DongjiangR	201604	2.1965
DongjiangR	201605	1.797
DongjiangR	201606	1.64
DongjiangR	201607	2.1617
DongjiangR	201608	1.93
DongjiangR	201609	2.34665
DongjiangR	201610	2.11
DongjiangR	201611	5.9317
DongjiangR	201612	2.305
FuxianL	201201	2.5
FuxianL	201202	3.67
FuxianL	201203	3.41
FuxianL	201204	1
FuxianL	201205	0.91
FuxianL	201206	1.37
FuxianL	201207	1.52
FuxianL	201208	1.42
FuxianL	201209	1.5
FuxianL	201210	1.69
FuxianL	201211	2.26
FuxianL	201212	1.69
FuxianL	201401	1.93
FuxianL	201402	3.67
FuxianL	201403	2.56
FuxianL	201404	1.54
FuxianL	201405	1.73
FuxianL	201406	1.07
FuxianL	201407	1.76
FuxianL	201408	2.67
FuxianL	201409	2.15
FuxianL	201410	2.72
FuxianL	201411	2.36
FuxianL	201412	1.68
FuxianL	201501	1.4
FuxianL	201502	2.2
FuxianL	201503	3.8
FuxianL	201504	3.8
FuxianL	201505	2
FuxianL	201506	2
FuxianL	201507	2.5
FuxianL	201508	2.1
FuxianL	201509	2.7
FuxianL	201510	2.3
FuxianL	201511	2.5
FuxianL	201512	3.2
FuxianL	201601	2.3
FuxianL	201602	1.7
FuxianL	201603	3.9
FuxianL	201604	3.9
FuxianL	201605	1.6
FuxianL	201606	2.4
FuxianL	201607	1.5
FuxianL	201608	1.6
FuxianL	201609	2.2
FuxianL	201610	1.9
FuxianL	201611	2.3
FuxianL	201612	2.5
FutouL	201201	15.3
FutouL	201202	9.4
FutouL	201203	8.6
FutouL	201204	9.6
FutouL	201205	10.55
FutouL	201206	9.7
FutouL	201207	11.1
FutouL	201208	11.5
FutouL	201209	10.55
FutouL	201210	10.1
FutouL	201211	14.95
FutouL	201212	14.95
FutouL	201401	9.575
FutouL	201402	8.36
FutouL	201403	9.37
FutouL	201404	10.005
FutouL	201405	8.2
FutouL	201406	9.945
FutouL	201407	10.45
FutouL	201408	9.495
FutouL	201409	9.1
FutouL	201410	10
FutouL	201411	9.68
FutouL	201412	10.5
FutouL	201501	11.925
FutouL	201502	14.11
FutouL	201503	13.64
FutouL	201504	12.43
FutouL	201505	10.78
FutouL	201506	12.615
FutouL	201507	10.295
FutouL	201508	12.735
FutouL	201509	14.49
FutouL	201510	9.97
FutouL	201511	14.62
FutouL	201512	13.27
FutouL	201601	11.805
FutouL	201602	12.22
FutouL	201603	9.775
FutouL	201604	11.69
FutouL	201605	14.29
FutouL	201606	15.45
FutouL	201608	13.73
FutouL	201609	12.005
FutouL	201610	18.035
FutouL	201611	17.44
FutouL	201612	15.835
FushuiR	201201	1.7
FushuiR	201202	10
FushuiR	201203	9.8
FushuiR	201204	11.2
FushuiR	201205	11.4
FushuiR	201206	11.4
FushuiR	201207	5.2
FushuiR	201208	5.5
FushuiR	201209	5.1
FushuiR	201210	5.2
FushuiR	201211	25.3
FushuiR	201212	24.8
FushuiR	201401	13.6
FushuiR	201403	13
FushuiR	201405	13.9
FushuiR	201408	22.8
FushuiR	201411	19.4
FushuiR	201501	17.4
FushuiR	201502	17.5
FushuiR	201503	17.1
FushuiR	201504	16.2
FushuiR	201505	18.2
FushuiR	201506	20.2
FushuiR	201507	16.5
FushuiR	201508	16.5
FushuiR	201509	16.4
FushuiR	201510	15.2
FushuiR	201511	17.8
FushuiR	201512	14.3
FushuiR	201601	2.43
FushuiR	201602	5.43
FushuiR	201603	3.01
FushuiR	201604	2.74
FushuiR	201605	1.41
FushuiR	201606	5.17
FushuiR	201608	10.32
FushuiR	201609	2.9
FushuiR	201610	4.64
FushuiR	201611	5.53
FushuiR	201612	3.33
GeheyanR	201201	2.23
GeheyanR	201202	2.16
GeheyanR	201203	1.23
GeheyanR	201204	1.83
GeheyanR	201205	2.01
GeheyanR	201206	1.87
GeheyanR	201207	1.08
GeheyanR	201208	2.01
GeheyanR	201209	1.55
GeheyanR	201210	1.82
GeheyanR	201211	1.51
GeheyanR	201212	1.4
GeheyanR	201401	2.21
GeheyanR	201402	1.12
GeheyanR	201403	1.21
GeheyanR	201404	2.11
GeheyanR	201405	1.97
GeheyanR	201406	1.62
GeheyanR	201407	1.88
GeheyanR	201408	2.01
GeheyanR	201409	2.05
GeheyanR	201410	1.76
GeheyanR	201411	1.87
GeheyanR	201412	1.98
GeheyanR	201501	1.57
GeheyanR	201502	1.5
GeheyanR	201503	1.56
GeheyanR	201504	1.6
GeheyanR	201505	1.56
GeheyanR	201506	1.52
GeheyanR	201507	2.54
GeheyanR	201508	1.98
GeheyanR	201509	1.94
GeheyanR	201510	2.07
GeheyanR	201511	3.28
GeheyanR	201512	2.12
GeheyanR	201601	2.6
GeheyanR	201602	2.56
GeheyanR	201603	1.59
GeheyanR	201604	1.67
GeheyanR	201605	1.64
GeheyanR	201606	1.7
GeheyanR	201607	1.46
GeheyanR	201608	1.22
GeheyanR	201609	2.06
GeheyanR	201610	5.22
GeheyanR	201611	1.97
HongL	201201	2.88
HongL	201202	4.88
HongL	201203	1.75
HongL	201204	2.09333
HongL	201205	1.74
HongL	201206	3.46333
HongL	201207	3.70333
HongL	201208	2.75333
HongL	201209	2.63
HongL	201210	5.24333
HongL	201211	3.59667
HongL	201212	3.39333
HongL	201401	5.23667
HongL	201402	4.36667
HongL	201403	3.98667
HongL	201404	1.63333
HongL	201405	3.09333
HongL	201406	2.7
HongL	201407	3.13667
HongL	201408	2.00667
HongL	201409	1.09333
HongL	201410	1.88667
HongL	201411	4.66
HongL	201412	4.02667
HongL	201501	3.41667
HongL	201502	1.84667
HongL	201503	2.79
HongL	201504	3.15
HongL	201505	2.78667
HongL	201506	3.19333
HongL	201507	2.59667
HongL	201508	2.67
HongL	201509	1.44
HongL	201510	3.67
HongL	201511	3.49
HongL	201512	3.69
HongL	201601	3.43
HongL	201602	1.59667
HongL	201603	2.36667
HongL	201604	2.07
HongL	201605	2.5
HongL	201606	2.29333
HongL	201608	1.37
HongL	201609	1.50667
HongL	201610	2.58667
HongL	201611	2.75667
HongL	201612	2.58667
HuanglongtanR	201201	6.23
HuanglongtanR	201202	5.795
HuanglongtanR	201203	5.41
HuanglongtanR	201204	1.94
HuanglongtanR	201205	1.135
HuanglongtanR	201206	1.365
HuanglongtanR	201207	1.485
HuanglongtanR	201208	2.225
HuanglongtanR	201209	3.01
HuanglongtanR	201210	2.955
HuanglongtanR	201211	2.86
HuanglongtanR	201212	2.315
HuanglongtanR	201401	0.495
HuanglongtanR	201402	0.495
HuanglongtanR	201403	1.625
HuanglongtanR	201404	3.77
HuanglongtanR	201405	2.94
HuanglongtanR	201406	1.82
HuanglongtanR	201407	1.04
HuanglongtanR	201408	2.345
HuanglongtanR	201409	0.635
HuanglongtanR	201410	1.06
HuanglongtanR	201411	2.255
HuanglongtanR	201412	2.105
HuanglongtanR	201501	2.54
HuanglongtanR	201502	2.465
HuanglongtanR	201503	2.16
HuanglongtanR	201504	3.55
HuanglongtanR	201505	2.955
HuanglongtanR	201506	3.215
HuanglongtanR	201507	2.2
HuanglongtanR	201508	1.36
HuanglongtanR	201509	1.645
HuanglongtanR	201510	1.42
HuanglongtanR	201511	1.285
HuanglongtanR	201512	1.325
HuanglongtanR	201601	1.345
HuanglongtanR	201602	1.345
HuanglongtanR	201603	9.52
HuanglongtanR	201604	5.635
HuanglongtanR	201605	5.665
HuanglongtanR	201606	1.82
HuanglongtanR	201607	5.475
HuanglongtanR	201608	5.04
HuanglongtanR	201609	0.6755
HuanglongtanR	201610	0.6495
HuanglongtanR	201611	0.921
HuanglongtanR	201612	0.247
LiangziL	201201	6.50875
LiangziL	201202	6.1725
LiangziL	201203	4.68375
LiangziL	201204	5.32875
LiangziL	201205	4.77625
LiangziL	201206	5.4875
LiangziL	201207	8.78
LiangziL	201208	8.51875
LiangziL	201209	9.30375
LiangziL	201210	11.875
LiangziL	201211	6.6525
LiangziL	201212	7.97625
LiangziL	201401	5.8025
LiangziL	201402	5.25625
LiangziL	201403	5.03625
LiangziL	201404	5.258
LiangziL	201405	5.3475
LiangziL	201406	5.445
LiangziL	201407	6.91125
LiangziL	201408	5.53375
LiangziL	201409	8.9775
LiangziL	201410	8.50125
LiangziL	201411	7.28375
LiangziL	201412	7.425
LiangziL	201501	9.1625
LiangziL	201502	8.4775
LiangziL	201503	8.84375
LiangziL	201504	6.6325
LiangziL	201505	6.20625
LiangziL	201506	7.6075
LiangziL	201507	9.2275
LiangziL	201508	9.9575
LiangziL	201509	14.925
LiangziL	201510	7.3475
LiangziL	201511	7.78625
LiangziL	201512	7.5475
LiangziL	201601	7.56625
LiangziL	201602	7.7275
LiangziL	201603	7.37375
LiangziL	201604	7.8375
LiangziL	201605	6.75
LiangziL	201606	7.0375
LiangziL	201608	9.5375
LiangziL	201609	8.7375
LiangziL	201610	12.9125
LiangziL	201611	10.925
LiangziL	201612	10.5
LongganL	201201	4.24
LongganL	201202	2.24
LongganL	201203	2.6
LongganL	201204	2.95
LongganL	201205	2.36
LongganL	201206	1.77
LongganL	201207	5.34
LongganL	201208	3.58
LongganL	201209	3.14
LongganL	201210	2.93
LongganL	201211	2.36
LongganL	201212	0.77
LongganL	201401	0.53
LongganL	201402	0.53
LongganL	201403	0.55
LongganL	201404	0.41
LongganL	201405	0.4
LongganL	201406	0.5
LongganL	201407	6.78
LongganL	201408	6.76
LongganL	201409	6.7
LongganL	201410	6
LongganL	201411	5.9
LongganL	201412	5.3
LongganL	201501	16.5
LongganL	201502	0.72
LongganL	201503	5.91
LongganL	201504	4.27
LongganL	201505	15.5
LongganL	201506	32.4
LongganL	201507	43.3
LongganL	201508	2.33
LongganL	201509	9.19
LongganL	201510	13.2
LongganL	201511	7.15
LongganL	201512	10.8
LongganL	201601	9.52
LongganL	201602	8.68
LongganL	201603	25.8
LongganL	201604	8.01
LongganL	201605	30.9
LongganL	201606	30.3
LongganL	201607	9.16
LongganL	201608	9.98
LongganL	201609	12.5
LongganL	201610	10.5
LongganL	201611	9.41
LongganL	201612	10.5
LuguL	201201	6
LuguL	201202	5
LuguL	201203	7
LuguL	201204	3
LuguL	201205	1
LuguL	201206	2
LuguL	201207	2
LuguL	201208	1
LuguL	201209	4
LuguL	201210	8.064
LuguL	201211	3
LuguL	201212	1.4481
LuguL	201401	3
LuguL	201402	3
LuguL	201403	2
LuguL	201404	2
LuguL	201405	4
LuguL	201406	1
LuguL	201407	2
LuguL	201408	2
LuguL	201409	2
LuguL	201410	1
LuguL	201411	1
LuguL	201412	1
LuguL	201501	2
LuguL	201502	2
LuguL	201503	4
LuguL	201504	3
LuguL	201505	0.5
LuguL	201506	1
LuguL	201507	1
LuguL	201508	1.1
LuguL	201509	1
LuguL	201510	2
LuguL	201511	1
LuguL	201512	1
LuguL	201601	1
LuguL	201602	1
LuguL	201603	2
LuguL	201604	2
LuguL	201605	1
LuguL	201606	2
LuguL	201607	1
LuguL	201608	1
LuguL	201609	2
LuguL	201610	2
LuguL	201611	1
LuguL	201612	2
NanyiL	201201	7.46
NanyiL	201202	1.87
NanyiL	201203	8.77
NanyiL	201204	8.025
NanyiL	201205	8.74
NanyiL	201206	8.345
NanyiL	201207	6.34
NanyiL	201208	4.815
NanyiL	201209	7.985
NanyiL	201210	7.27
NanyiL	201211	3.2
NanyiL	201212	7.705
NanyiL	201401	8.05
NanyiL	201402	4.315
NanyiL	201403	3.155
NanyiL	201404	4.42
NanyiL	201405	8.72
NanyiL	201406	1.935
NanyiL	201407	7.85
NanyiL	201408	3.485
NanyiL	201409	7.05
NanyiL	201410	4.435
NanyiL	201411	3.63
NanyiL	201412	5.44
NanyiL	201501	12.55
NanyiL	201502	7.87
NanyiL	201503	7
NanyiL	201504	3.435
NanyiL	201505	5.865
NanyiL	201506	6.18
NanyiL	201507	5.405
NanyiL	201508	2.635
NanyiL	201509	2.93
NanyiL	201510	4.04
NanyiL	201511	4.37
NanyiL	201512	3.38
NanyiL	201601	4.305
NanyiL	201602	8.74
NanyiL	201603	11.155
NanyiL	201604	19.5
NanyiL	201605	0.81
NanyiL	201606	3.5
NanyiL	201607	1.36
NanyiL	201608	1.2295
NanyiL	201609	11.315
NanyiL	201610	2.625
NanyiL	201611	6.985
NanyiL	201612	5.245
ShengjinL	201207	1.86
ShengjinL	201208	1.92
ShengjinL	201209	1.89
ShengjinL	201210	1.92
ShengjinL	201211	1.97
ShengjinL	201212	1.84
ShengjinL	201401	1.62
ShengjinL	201402	1.6
ShengjinL	201403	1.59
ShengjinL	201404	1.57
ShengjinL	201405	1.61
ShengjinL	201406	1.59
ShengjinL	201407	1.66
ShengjinL	201408	1.72
ShengjinL	201409	1.68
ShengjinL	201410	1.56
ShengjinL	201411	1.66
ShengjinL	201412	1.74
ShengjinL	201501	1.65
ShengjinL	201502	1.65
ShengjinL	201503	1.69
ShengjinL	201504	1.67
ShengjinL	201505	0.9
ShengjinL	201506	2.7
ShengjinL	201507	1.5
ShengjinL	201508	1.6
ShengjinL	201509	1.8
ShengjinL	201510	1.6
ShengjinL	201511	2.4
ShengjinL	201512	2.4
ShengjinL	201601	1.6
ShengjinL	201602	0.5
ShengjinL	201603	1.69
ShengjinL	201604	0.5
ShengjinL	201605	0.5
ShengjinL	201606	1.67
ShengjinL	201607	2.1
ShengjinL	201608	1.79
ShengjinL	201609	1.78
ShengjinL	201610	1.75
ShengjinL	201611	2.05
ShengjinL	201612	2.16
TaipingL	201201	3.29
TaipingL	201202	1.34
TaipingL	201203	2.36
TaipingL	201204	2.82
TaipingL	201205	4.9
TaipingL	201206	5.37
TaipingL	201207	2.08
TaipingL	201208	0.77
TaipingL	201209	15
TaipingL	201210	6.08
TaipingL	201211	4.6
TaipingL	201212	2.74
TaipingL	201401	4.68
TaipingL	201402	5.29
TaipingL	201403	2
TaipingL	201404	1.48
TaipingL	201405	5.95
TaipingL	201406	9.7
TaipingL	201407	6.46
TaipingL	201408	6.89
TaipingL	201409	10.9
TaipingL	201410	16.7
TaipingL	201411	1.36
TaipingL	201412	1.76
TaipingL	201501	3.75
TaipingL	201502	1.37
TaipingL	201503	1.37
TaipingL	201504	3.8
TaipingL	201505	9.67
TaipingL	201506	8.77
TaipingL	201507	13.4
TaipingL	201508	8.6
TaipingL	201509	8.6
TaipingL	201510	5.1
TaipingL	201511	5.1
TaipingL	201512	1.76
TaipingL	201601	1.89
TaipingL	201602	3.32
TaipingL	201603	6.63
TaipingL	201604	3.92
TaipingL	201605	17.7
TaipingL	201606	4.14
TaipingL	201607	8.39
TaipingL	201608	2.13
TaipingL	201609	3.67
TaipingL	201610	5.52
TaipingL	201611	4.83
TaipingL	201612	2.02
WuchangL	201201	4.25
WuchangL	201202	3.7
WuchangL	201203	1.88
WuchangL	201204	1.35
WuchangL	201205	1.17
WuchangL	201206	2.6
WuchangL	201207	4.54
WuchangL	201208	4.31
WuchangL	201209	3.06
WuchangL	201210	2.36
WuchangL	201211	1.2
WuchangL	201212	1.17
WuchangL	201401	1.71
WuchangL	201402	2.42
WuchangL	201403	1.67
WuchangL	201404	2.1
WuchangL	201405	3.66
WuchangL	201406	2.86
WuchangL	201407	2.1
WuchangL	201408	2.31
WuchangL	201409	1.81
WuchangL	201410	1.8
WuchangL	201411	2.34
WuchangL	201412	2.15
WuchangL	201501	1.93
WuchangL	201502	2.11
WuchangL	201503	1.67
WuchangL	201504	1.7
WuchangL	201505	2.36
WuchangL	201506	2.66
WuchangL	201507	2.63
WuchangL	201508	2.1
WuchangL	201509	2.93
WuchangL	201510	5.19
WuchangL	201511	1.85
WuchangL	201512	6.36
WuchangL	201601	4.5
WuchangL	201602	1.26
WuchangL	201603	3
WuchangL	201604	1.73
WuchangL	201605	1.53
WuchangL	201606	5.21
WuchangL	201607	1.76
WuchangL	201608	11
WuchangL	201609	8
WuchangL	201610	14.7
WuchangL	201611	2.7
WuchangL	201612	3.65
YangchengL	201201	13.7
YangchengL	201202	4.9
YangchengL	201203	3.1
YangchengL	201204	10.6
YangchengL	201205	2.8
YangchengL	201206	12.6
YangchengL	201207	9.4
YangchengL	201208	12.4
YangchengL	201209	12.8
YangchengL	201210	22.2
YangchengL	201211	14.9
YangchengL	201212	18.2
YangchengL	201401	19.8
YangchengL	201402	18.3
YangchengL	201403	20.8
YangchengL	201404	27.9
YangchengL	201405	25.7
YangchengL	201406	28.8
YangchengL	201407	32
YangchengL	201408	35.5
YangchengL	201409	21.9
YangchengL	201410	20.2
YangchengL	201411	13.8
YangchengL	201412	14.8
YangchengL	201501	22.8
YangchengL	201502	19.1
YangchengL	201503	19.3
YangchengL	201504	18.6
YangchengL	201505	22.2
YangchengL	201506	18.3
YangchengL	201507	19.5
YangchengL	201508	15.1
YangchengL	201509	18.3
YangchengL	201510	18.8
YangchengL	201511	16
YangchengL	201512	15.9
YangchengL	201601	10.9
YangchengL	201602	12.3
YangchengL	201603	11.4
YangchengL	201604	15.6
YangchengL	201605	15.2
YangchengL	201606	6.49
YangchengL	201607	12
YangchengL	201608	13.6
YangchengL	201609	14
YangchengL	201610	12.1
YangchengL	201611	10.3
YangchengL	201612	12.3
Yangzonghai	201201	16
Yangzonghai	201202	17
Yangzonghai	201203	9
Yangzonghai	201204	7
Yangzonghai	201205	17
Yangzonghai	201206	15
Yangzonghai	201207	10
Yangzonghai	201208	19
Yangzonghai	201209	25
Yangzonghai	201210	18
Yangzonghai	201211	14
Yangzonghai	201212	10
Yangzonghai	201401	15
Yangzonghai	201402	19
Yangzonghai	201403	10
Yangzonghai	201404	17
Yangzonghai	201405	9
Yangzonghai	201406	6
Yangzonghai	201407	11
Yangzonghai	201408	10
Yangzonghai	201409	12
Yangzonghai	201410	16
Yangzonghai	201411	12
Yangzonghai	201412	9
Yangzonghai	201501	20
Yangzonghai	201502	9
Yangzonghai	201503	10
Yangzonghai	201504	6
Yangzonghai	201505	6
Yangzonghai	201506	8
Yangzonghai	201507	6
Yangzonghai	201508	3
Yangzonghai	201509	6
Yangzonghai	201510	3
Yangzonghai	201511	1
Yangzonghai	201512	10
Yangzonghai	201601	9
Yangzonghai	201602	5
Yangzonghai	201603	7
Yangzonghai	201604	4
Yangzonghai	201605	12
Yangzonghai	201606	7
Yangzonghai	201607	5
Yangzonghai	201608	4
Yangzonghai	201609	8
Yangzonghai	201610	7
Yangzonghai	201611	13
Yangzonghai	201612	7
ZhangheR	201201	1.16
ZhangheR	201202	1.13
ZhangheR	201203	0.79
ZhangheR	201204	1.1
ZhangheR	201205	3.07
ZhangheR	201206	1.95
ZhangheR	201207	2.49
ZhangheR	201208	1.96
ZhangheR	201209	1.29
ZhangheR	201210	1
ZhangheR	201211	0.645
ZhangheR	201212	2.165
ZhangheR	201401	1.25
ZhangheR	201402	1.1
ZhangheR	201403	0.45
ZhangheR	201404	0.85
ZhangheR	201405	1.25
ZhangheR	201406	1.3
ZhangheR	201407	2.55
ZhangheR	201408	1.05
ZhangheR	201409	0.7
ZhangheR	201410	1.3
ZhangheR	201411	1.3
ZhangheR	201412	1.55
ZhangheR	201501	1.35
ZhangheR	201502	4.1
ZhangheR	201503	0.6
ZhangheR	201504	0.95
ZhangheR	201505	1
ZhangheR	201506	0.7
ZhangheR	201507	1.15
ZhangheR	201508	0.95
ZhangheR	201509	1.05
ZhangheR	201510	1.2
ZhangheR	201511	0.7
ZhangheR	201512	3.4
ZhangheR	201601	3.55
ZhangheR	201602	1.85
ZhangheR	201603	1.55
ZhangheR	201604	1.3
ZhangheR	201605	2
ZhangheR	201606	1.4
ZhangheR	201607	1
ZhangheR	201608	0.85
ZhangheR	201609	1.7
ZhangheR	201610	1.15
ZhangheR	201611	1.2
ZhangheR	201612	0.65
DongpuR	200701	3
DongpuR	200702	2
DongpuR	200703	5
DongpuR	200704	4
DongpuR	200705	1
DongpuR	200706	2
DongpuR	200707	2
DongpuR	200708	4
DongpuR	200709	3
DongpuR	200710	2
DongpuR	200711	2
DongpuR	200712	2
DongpuR	200801	1
DongpuR	200802	1
DongpuR	200803	5
DongpuR	200804	5
DongpuR	200805	4
DongpuR	200806	6
DongpuR	200807	7
DongpuR	200808	3
DongpuR	200809	5
DongpuR	200810	2
DongpuR	200811	2
DongpuR	200812	1
DongpuR	200901	2
DongpuR	200902	2
DongpuR	200903	8
DongpuR	200904	8.6
DongpuR	200905	9
DongpuR	200906	9.3
DongpuR	200907	7
DongpuR	200908	9
DongpuR	200909	9
DongpuR	200910	8
DongpuR	200911	7.4
DongpuR	200912	3
DongpuR	201001	9
DongpuR	201002	5.6
DongpuR	201003	5
DongpuR	201004	5
DongpuR	201005	11
DongpuR	201006	6
DongpuR	201007	11
DongpuR	201008	5.1
DongpuR	201009	14.08
DongpuR	201010	8.74
DongpuR	201011	13.39
DongpuR	201012	3.96
DongpuR	201101	6.7
DongpuR	201102	5.9
DongpuR	201103	6.1
DongpuR	201104	4.5
DongpuR	201105	3.8
DongpuR	201106	3.9
DongpuR	201107	6.6
DongpuR	201108	7.5
DongpuR	201109	7.4
DongpuR	201110	6.81
DongpuR	201111	3.31
DongpuR	201112	4.7
DongpuR	201201	2.9
DongpuR	201202	6.67
DongpuR	201203	4.71
DongpuR	201204	3.63
DongpuR	201205	4.9
DongpuR	201206	3.14
DongpuR	201207	3.51
DongpuR	201208	7.57
DongpuR	201209	14.3
DongpuR	201210	5.44
DongpuR	201211	5.17
DongpuR	201212	4.04
DongpuR	201501	3.26
DongpuR	201502	2.4
DongpuR	201503	2.13
DongpuR	201504	1.15
DongpuR	201505	2.43
DongpuR	201506	3.53
DongpuR	201507	3.8
DongpuR	201508	7.9
DongpuR	201509	1.15
DongpuR	201510	4.05
DongpuR	201511	9.87
DongpuR	201512	9.87
DongpuR	201601	11.01
DongpuR	201602	9.25
DongpuR	201603	7.02
DongpuR	201604	1.8
DongpuR	201605	6.1
DongpuR	201606	16.05
DongpuR	201607	10.2
DongpuR	201608	8.9
DongpuR	201609	10.9
DongpuR	201610	2.8
DongpuR	201611	5.1
DongpuR	201612	10.7
ChaoL	200701	7.56833
ChaoL	200702	7.13
ChaoL	200703	6.155
ChaoL	200704	23.7533
ChaoL	200705	10.7883
ChaoL	200706	19.1483
ChaoL	200707	7.74
ChaoL	200708	32.7017
ChaoL	200709	25.98
ChaoL	200710	24.0383
ChaoL	200711	12.5717
ChaoL	200712	5.315
ChaoL	200801	16.3983
ChaoL	200802	8.22833
ChaoL	200803	5.16667
ChaoL	200804	4.83333
ChaoL	200805	12.3333
ChaoL	200806	25.1667
ChaoL	200807	29.3967
ChaoL	200808	30.8183
ChaoL	200809	51.045
ChaoL	200810	20.2583
ChaoL	200811	20.295
ChaoL	200812	10.4567
ChaoL	200901	8.82
ChaoL	200902	6.19833
ChaoL	200903	5.41833
ChaoL	200904	4.94
ChaoL	200905	6.5
ChaoL	200906	31.45
ChaoL	200907	26.5
ChaoL	200908	29.8
ChaoL	200909	29.0333
ChaoL	200910	19.0167
ChaoL	200911	12.7833
ChaoL	200912	9.95
ChaoL	201001	4.9
ChaoL	201002	5.3
ChaoL	201003	8.5
ChaoL	201004	14.8333
ChaoL	201005	17.1667
ChaoL	201006	17.6667
ChaoL	201007	8.18333
ChaoL	201008	25.895
ChaoL	201009	11.1567
ChaoL	201010	17.5483
ChaoL	201011	8.23667
ChaoL	201012	2.24833
ChaoL	201101	7.31667
ChaoL	201102	5.8
ChaoL	201103	11.8
ChaoL	201104	12.3383
ChaoL	201105	18.3367
ChaoL	201106	8.36833
ChaoL	201107	14.0483
ChaoL	201108	40.9617
ChaoL	201109	20.8917
ChaoL	201110	9.02167
ChaoL	201111	11.5817
ChaoL	201112	8.49833
ChaoL	201201	19.0483
ChaoL	201202	22.5817
ChaoL	201203	20.4717
ChaoL	201204	4.15167
ChaoL	201205	21.3517
ChaoL	201206	10.8567
ChaoL	201207	16.4367
ChaoL	201208	20.0017
ChaoL	201209	13.0217
ChaoL	201210	16.3567
ChaoL	201211	37.2667
ChaoL	201212	11.1283
ChaoL	201401	15.09
ChaoL	201402	22.2233
ChaoL	201403	19.54
ChaoL	201404	3.08
ChaoL	201405	10.0717
ChaoL	201406	10.0333
ChaoL	201407	19.22
ChaoL	201408	10.441
ChaoL	201409	23.3617
ChaoL	201410	6.46667
ChaoL	201411	31.4533
ChaoL	201412	4.47833
ChaoL	201501	37.3067
ChaoL	201502	18.0583
ChaoL	201503	12.04
ChaoL	201504	8.00833
ChaoL	201505	5.515
ChaoL	201506	3.62333
ChaoL	201507	9.04667
ChaoL	201508	5.10167
ChaoL	201509	3.77
ChaoL	201510	2.88
ChaoL	201511	4.50167
ChaoL	201512	2.71
ChaoL	201601	9.81667
ChaoL	201602	16.6333
ChaoL	201603	9.40333
ChaoL	201604	9.50833
ChaoL	201605	7.045
ChaoL	201606	3.93167
ChaoL	201607	4.82667
ChaoL	201608	7.83
ChaoL	201609	5.45833
ChaoL	201610	2.53333
ChaoL	201611	2.37
ChaoL	201612	7.245
DanjiangkouR	200701	1.65
DanjiangkouR	200702	1.65
DanjiangkouR	200703	2.1
DanjiangkouR	200704	1.385
DanjiangkouR	200705	1.725
DanjiangkouR	200706	1.65
DanjiangkouR	200707	1.65
DanjiangkouR	200708	1.65
DanjiangkouR	200709	1.7025
DanjiangkouR	200710	1.385
DanjiangkouR	200711	1.59
DanjiangkouR	200712	1.385
DanjiangkouR	200801	1.385
DanjiangkouR	200802	1.385
DanjiangkouR	200803	1.385
DanjiangkouR	200804	1.5
DanjiangkouR	200805	1.635
DanjiangkouR	200806	1.67
DanjiangkouR	200807	1.8425
DanjiangkouR	200808	1.84
DanjiangkouR	200809	1.635
DanjiangkouR	200810	1.885
DanjiangkouR	200811	1.84
DanjiangkouR	200812	1.385
DanjiangkouR	200901	1.635
DanjiangkouR	200902	1.885
DanjiangkouR	200903	1.25
DanjiangkouR	200904	1.635
DanjiangkouR	200905	1.885
DanjiangkouR	200906	2.09
DanjiangkouR	200907	9.07
DanjiangkouR	200908	1.3725
DanjiangkouR	200909	1.165
DanjiangkouR	200910	1.19
DanjiangkouR	200911	1.0275
DanjiangkouR	200912	9.1
DanjiangkouR	201001	9.1
DanjiangkouR	201002	9.35
DanjiangkouR	201003	1.135
DanjiangkouR	201004	1.2025
DanjiangkouR	201005	1.84
DanjiangkouR	201006	2.09
DanjiangkouR	201007	2.365
DanjiangkouR	201008	2.0475
DanjiangkouR	201009	1.635
DanjiangkouR	201010	1.84
DanjiangkouR	201011	1.84
DanjiangkouR	201012	1.9525
DanjiangkouR	201101	1.7025
DanjiangkouR	201102	1.635
DanjiangkouR	201103	1.635
DanjiangkouR	201104	1.635
DanjiangkouR	201105	1.385
DanjiangkouR	201106	1.84
DanjiangkouR	201107	1.84
DanjiangkouR	201108	2.0475
DanjiangkouR	201109	1.635
DanjiangkouR	201110	1.385
DanjiangkouR	201111	1.5
DanjiangkouR	201112	1.5675
DanjiangkouR	201201	1.3475
DanjiangkouR	201202	1.4325
DanjiangkouR	201203	1.4325
DanjiangkouR	201204	1.4325
DanjiangkouR	201205	1.1825
DanjiangkouR	201206	1.3875
DanjiangkouR	201207	1.4775
DanjiangkouR	201208	1.365
DanjiangkouR	201209	1.4325
DanjiangkouR	201210	1.1825
DanjiangkouR	201211	1.3875
DanjiangkouR	201212	1.2275
DanjiangkouR	201401	1.15908
DanjiangkouR	201402	1.20458
DanjiangkouR	201403	1.24975
DanjiangkouR	201404	1.20458
DanjiangkouR	201405	1.22717
DanjiangkouR	201406	1.61242
DanjiangkouR	201407	1.15942
DanjiangkouR	201408	1.27233
DanjiangkouR	201409	1.47717
DanjiangkouR	201410	1.22717
DanjiangkouR	201411	1.20458
DanjiangkouR	201412	1.11425
DanjiangkouR	201501	1.1825
DanjiangkouR	201502	1.1375
DanjiangkouR	201503	1.2045
DanjiangkouR	201504	1.24975
DanjiangkouR	201505	1.27225
DanjiangkouR	201506	1.24975
DanjiangkouR	201507	1.27225
DanjiangkouR	201508	1.24975
DanjiangkouR	201509	1.2825
DanjiangkouR	201510	1.4545
DanjiangkouR	201511	1.182
DanjiangkouR	201512	1.27225
DanjiangkouR	201601	1.2045
DanjiangkouR	201602	1.13675
DanjiangkouR	201603	1.182
DanjiangkouR	201604	1.47725
DanjiangkouR	201605	4.8675
DanjiangkouR	201606	5.0925
DanjiangkouR	201607	1.38675
DanjiangkouR	201608	0.83625
DanjiangkouR	201609	1.295
DanjiangkouR	201610	1.27225
DanjiangkouR	201611	1.1945
DanjiangkouR	201612	1.24825
Dianchi	200701	64.1111
Dianchi	200702	35.5556
Dianchi	200704	51.1111
Dianchi	200705	45.1111
Dianchi	200706	49.8889
Dianchi	200707	62.1111
Dianchi	200708	61.1111
Dianchi	200709	207
Dianchi	200710	67.1111
Dianchi	200711	83
Dianchi	200712	83
Dianchi	200801	54.8889
Dianchi	200802	19.6667
Dianchi	200803	28.6667
Dianchi	200804	56.3333
Dianchi	200805	42.5556
Dianchi	200806	63
Dianchi	200807	65.6667
Dianchi	200808	60
Dianchi	200809	76.5556
Dianchi	200810	66.5556
Dianchi	200811	130.889
Dianchi	200812	98.6667
Dianchi	200901	66.5556
Dianchi	200902	59.1111
Dianchi	200903	63.7778
Dianchi	200904	62.4444
Dianchi	200905	60
Dianchi	200906	69.4444
Dianchi	200907	80.7778
Dianchi	200908	119.667
Dianchi	200909	153.889
Dianchi	200910	159.889
Dianchi	200911	89
Dianchi	200912	44.2222
Dianchi	201001	38.1111
Dianchi	201002	42.4444
Dianchi	201003	70.6667
Dianchi	201004	79.3333
Dianchi	201005	115.111
Dianchi	201006	100.667
Dianchi	201007	106.667
Dianchi	201008	98
Dianchi	201009	88.2222
Dianchi	201010	69.7778
Dianchi	201011	110.556
Dianchi	201012	115
Dianchi	201101	73.8889
Dianchi	201102	38
Dianchi	201103	52.6667
Dianchi	201104	58
Dianchi	201105	86.6667
Dianchi	201106	67.8889
Dianchi	201107	125.333
Dianchi	201108	125.333
Dianchi	201109	97.8889
Dianchi	201110	79.3333
Dianchi	201111	83.4444
Dianchi	201112	67.4444
Dianchi	201201	49.8889
Dianchi	201202	80.8889
Dianchi	201203	72.2222
Dianchi	201204	83.3333
Dianchi	201205	118.667
Dianchi	201206	95.1111
Dianchi	201207	100.889
Dianchi	201208	103.333
Dianchi	201209	126.222
Dianchi	201210	129.667
Dianchi	201211	120.444
Dianchi	201212	39.1111
Dianchi	201401	56.1111
Dianchi	201402	34.4444
Dianchi	201403	55.5556
Dianchi	201404	36
Dianchi	201405	85.2222
Dianchi	201406	177.444
Dianchi	201407	128.556
Dianchi	201408	161.111
Dianchi	201409	107.889
Dianchi	201410	70.6667
Dianchi	201411	51.3333
Dianchi	201412	48.6667
Dianchi	201501	68.2222
Dianchi	201502	48.8889
Dianchi	201503	67.6667
Dianchi	201504	59.5556
Dianchi	201505	73.1111
Dianchi	201506	59.7778
Dianchi	201507	62.3333
Dianchi	201508	55.5556
Dianchi	201509	76.7778
Dianchi	201510	82
Dianchi	201511	75.6667
Dianchi	201512	50.7778
Dianchi	201601	30.5556
Dianchi	201602	30.2222
Dianchi	201603	20.6667
Dianchi	201604	32.4444
Dianchi	201605	85.8889
Dianchi	201606	72.1111
Dianchi	201607	113.778
Dianchi	201608	159.111
Dianchi	201609	96.8889
Dianchi	201610	73.7778
Dianchi	201611	48.2222
Dianchi	201612	65.6667
DongtingL	200701	1.38833
DongtingL	200702	2.11667
DongtingL	200703	1.6375
DongtingL	200704	0.7725
DongtingL	200705	1.48083
DongtingL	200706	0.705833
DongtingL	200707	1.29833
DongtingL	200708	2.34583
DongtingL	200709	1.13833
DongtingL	200710	0.500833
DongtingL	200711	1.45667
DongtingL	200712	4.43222
DongtingL	200801	1.375
DongtingL	200802	2.79083
DongtingL	200803	3.34417
DongtingL	200804	1.70111
DongtingL	200805	1.68417
DongtingL	200806	0.840833
DongtingL	200807	1.22833
DongtingL	200808	1.61417
DongtingL	200809	1.77417
DongtingL	200810	1.32
DongtingL	200811	0.568333
DongtingL	200812	1.92
DongtingL	200901	4.09583
DongtingL	200902	3.27167
DongtingL	200903	4.455
DongtingL	200904	2.085
DongtingL	200905	4.71083
DongtingL	200906	2.06417
DongtingL	200907	1.78
DongtingL	200908	1.78
DongtingL	200909	2.89417
DongtingL	200910	5.58083
DongtingL	200911	11.585
DongtingL	200912	5.15083
DongtingL	201001	6.13917
DongtingL	201002	9.74
DongtingL	201003	4.8275
DongtingL	201004	4.20333
DongtingL	201005	8.5275
DongtingL	201006	6.43667
DongtingL	201007	10.4492
DongtingL	201008	6.98583
DongtingL	201009	8.265
DongtingL	201010	2.4175
DongtingL	201011	3.91
DongtingL	201012	5.01167
DongtingL	201101	2.43
DongtingL	201102	4.2775
DongtingL	201103	3.96167
DongtingL	201104	2.97167
DongtingL	201105	5.9325
DongtingL	201106	1.9625
DongtingL	201107	4.0325
DongtingL	201108	3.11417
DongtingL	201109	3.67083
DongtingL	201110	2.7225
DongtingL	201111	3.12167
DongtingL	201112	2.06167
DongtingL	201201	2.8775
DongtingL	201202	3.2075
DongtingL	201203	2.3
DongtingL	201204	2.055
DongtingL	201205	2.37
DongtingL	201206	3.36
DongtingL	201207	3.29
DongtingL	201208	2.1875
DongtingL	201209	2.175
DongtingL	201210	2.8075
DongtingL	201211	1.0175
DongtingL	201212	3.555
DongtingL	201401	1.2575
DongtingL	201402	0.62
DongtingL	201403	1.60168
DongtingL	201404	1.3975
DongtingL	201405	0.683325
DongtingL	201406	1.76085
DongtingL	201407	1.79332
DongtingL	201408	4.22
DongtingL	201409	1.875
DongtingL	201410	1.07085
DongtingL	201411	1.24168
DongtingL	201412	0.82
DongtingL	201501	1.995
DongtingL	201502	1.73917
DongtingL	201503	3.31168
DongtingL	201504	2.37833
DongtingL	201505	2.39753
DongtingL	201506	1.835
DongtingL	201507	2.49
DongtingL	201508	1.39003
DongtingL	201509	1.41415
DongtingL	201510	3.2775
DongtingL	201511	1.36835
DongtingL	201512	2.10248
DongtingL	201601	1.554
DongtingL	201602	1.33
DongtingL	201603	8.24075
DongtingL	201604	2.9975
DongtingL	201605	1.96825
DongtingL	201606	3.29175
DongtingL	201607	2.59165
DongtingL	201608	4.27082
DongtingL	201609	4.70083
DongtingL	201610	2.91228
DongtingL	201611	1.7833
DongtingL	201612	2.21265
PoyangL	200704	3.975
PoyangL	200708	4.2
PoyangL	200712	3.325
PoyangL	200803	5.925
PoyangL	200809	4.95
PoyangL	200811	8.91
PoyangL	200901	5.8175
PoyangL	200903	9.57
PoyangL	200904	9.03
PoyangL	200905	9.2525
PoyangL	200906	8.995
PoyangL	200907	7.905
PoyangL	200908	5.9625
PoyangL	200909	6.31
PoyangL	200910	7.7175
PoyangL	200911	3.9125
PoyangL	200912	3.1225
PoyangL	201001	2.6025
PoyangL	201002	2.755
PoyangL	201003	4.3225
PoyangL	201004	3.4525
PoyangL	201005	6.5625
PoyangL	201006	4.7775
PoyangL	201007	7.23
PoyangL	201008	5.6975
PoyangL	201009	7.5225
PoyangL	201010	5.4525
PoyangL	201011	5.6275
PoyangL	201012	3.9325
PoyangL	201101	4.395
PoyangL	201102	7.245
PoyangL	201103	1.83
PoyangL	201104	2.1125
PoyangL	201105	3.77
PoyangL	201106	4.2525
PoyangL	201107	7.7575
PoyangL	201108	4.7225
PoyangL	201109	4.6575
PoyangL	201110	3.0975
PoyangL	201111	3.13
PoyangL	201112	4.115
PoyangL	201201	4.4
PoyangL	201202	3.94
PoyangL	201203	2.279
PoyangL	201204	1.395
PoyangL	201205	6.7975
PoyangL	201206	5.175
PoyangL	201207	3.07
PoyangL	201208	2.4
PoyangL	201209	3.18
PoyangL	201210	8.985
PoyangL	201211	3.61
PoyangL	201212	4.9225
PoyangL	201401	2.9425
PoyangL	201402	2.7475
PoyangL	201403	2.1725
PoyangL	201404	2.0825
PoyangL	201405	2.6475
PoyangL	201406	2.3525
PoyangL	201407	3.6175
PoyangL	201408	2.5725
PoyangL	201409	2.06
PoyangL	201410	3.04
PoyangL	201411	2.07
PoyangL	201412	2.225
PoyangL	201501	2.2325
PoyangL	201502	2.1725
PoyangL	201503	1.9475
PoyangL	201504	1.7825
PoyangL	201505	2.55
PoyangL	201506	2.03
PoyangL	201507	2.2675
PoyangL	201508	3.14
PoyangL	201509	3.5025
PoyangL	201510	3.805
PoyangL	201511	2.545
PoyangL	201512	2.845
PoyangL	201601	2.4
PoyangL	201602	3.1
PoyangL	201603	2.625
PoyangL	201604	3.4
PoyangL	201605	2.5
PoyangL	201606	2.525
PoyangL	201607	2.35
PoyangL	201608	2.925
PoyangL	201609	2.575
PoyangL	201610	2.96
PoyangL	201611	2.375
PoyangL	201612	2.97
TaiL	200701	15.125
TaiL	200702	12.875
TaiL	200703	19.875
TaiL	200704	14
TaiL	200705	63.25
TaiL	200706	28
TaiL	200707	31.5
TaiL	200708	20.625
TaiL	200709	25.875
TaiL	200710	19.3875
TaiL	200711	83.625
TaiL	200712	23.625
TaiL	200801	31.8333
TaiL	200802	5.85714
TaiL	200803	14.2857
TaiL	200804	15.5714
TaiL	200805	14.8571
TaiL	200806	12.7143
TaiL	200807	28.5714
TaiL	200808	41.7143
TaiL	200809	26
TaiL	200810	66.2857
TaiL	200811	70.8571
TaiL	200812	22.7143
TaiL	200901	7.75
TaiL	200902	10
TaiL	200903	5.625
TaiL	200904	12
TaiL	200905	23
TaiL	200906	11.75
TaiL	200907	61.875
TaiL	200908	21.25
TaiL	200909	22.375
TaiL	200910	23.5
TaiL	200911	6.875
TaiL	200912	4.5
TaiL	201001	6.5
TaiL	201002	13.125
TaiL	201003	7.25
TaiL	201004	7.625
TaiL	201005	17.5
TaiL	201006	12.625
TaiL	201007	15.375
TaiL	201008	20.125
TaiL	201009	58.375
TaiL	201010	42.75
TaiL	201011	20.25
TaiL	201012	20.5
TaiL	201101	9.625
TaiL	201102	9.125
TaiL	201103	17
TaiL	201104	15.25
TaiL	201105	10.75
TaiL	201106	8.25
TaiL	201107	10.625
TaiL	201108	32.625
TaiL	201109	46.5
TaiL	201110	47.25
TaiL	201111	20.125
TaiL	201112	23.75
TaiL	201201	16.5
TaiL	201202	14.625
TaiL	201203	12
TaiL	201204	16.125
TaiL	201205	24.625
TaiL	201206	28.75
TaiL	201207	16.5
TaiL	201208	26.375
TaiL	201209	24.3125
TaiL	201210	51.5
TaiL	201211	24.875
TaiL	201212	14
TaiL	201401	22.25
TaiL	201402	14.5
TaiL	201403	17.25
TaiL	201404	17.625
TaiL	201405	18
TaiL	201406	13.5
TaiL	201407	17.625
TaiL	201408	14.375
TaiL	201409	15.125
TaiL	201410	25.75
TaiL	201411	29.25
TaiL	201412	20.75
TaiL	201501	13.5
TaiL	201502	8.375
TaiL	201503	13.75
TaiL	201504	15.25
TaiL	201505	5
TaiL	201506	41.375
TaiL	201507	53.5
TaiL	201508	18.625
TaiL	201509	33.25
TaiL	201510	19.125
TaiL	201511	63.25
TaiL	201512	18
TaiL	201601	4.875
TaiL	201602	4.75
TaiL	201603	15.5
TaiL	201604	10.875
TaiL	201605	8.375
TaiL	201606	8.125
TaiL	201607	8.65
TaiL	201608	7.7875
TaiL	201609	8.3875
TaiL	201610	9.54
TaiL	201611	27.11
TaiL	201612	35.3125
SongtaoR	201201	2
SongtaoR	201203	2
SongtaoR	201204	3
SongtaoR	201206	9
SongtaoR	201207	6
SongtaoR	201208	5
SongtaoR	201209	4
SongtaoR	201210	6
SongtaoR	201211	5
SongtaoR	201212	5
SongtaoR	201401	1
SongtaoR	201402	1.5
SongtaoR	201403	1.4
SongtaoR	201404	2.2
SongtaoR	201405	1.7
SongtaoR	201406	2
SongtaoR	201407	2.6
SongtaoR	201408	2.3
SongtaoR	201409	1.3
SongtaoR	201410	2.9
SongtaoR	201411	3.9
SongtaoR	201412	3.2
SongtaoR	201501	1.8
SongtaoR	201502	1.4
SongtaoR	201503	0.7
SongtaoR	201504	1.6
SongtaoR	201505	1.1
SongtaoR	201506	1.3
SongtaoR	201507	1.6
SongtaoR	201508	2.2
SongtaoR	201509	1.5
SongtaoR	201510	3.4
SongtaoR	201511	3.5
SongtaoR	201512	2.9
SongtaoR	201601	2.1
SongtaoR	201602	2.6
SongtaoR	201603	1.9
SongtaoR	201604	1.7
SongtaoR	201605	1.6
SongtaoR	201606	1.7
SongtaoR	201607	1.6
SongtaoR	201608	2
SongtaoR	201609	3.2
SongtaoR	201610	2.9
SongtaoR	201611	0.9
SongtaoR	201612	1.3
DaguangbaR	201202	5
DaguangbaR	201203	6
DaguangbaR	201204	5
DaguangbaR	201205	8
DaguangbaR	201206	6
DaguangbaR	201207	9
DaguangbaR	201208	10
DaguangbaR	201209	6
DaguangbaR	201210	6
DaguangbaR	201211	4
DaguangbaR	201212	20
DaguangbaR	201401	3.6
DaguangbaR	201402	3.9
DaguangbaR	201403	4
DaguangbaR	201404	1.7
DaguangbaR	201405	2
DaguangbaR	201406	5.3
DaguangbaR	201407	3.1
DaguangbaR	201408	3.6
DaguangbaR	201409	14.7
DaguangbaR	201410	2.7
DaguangbaR	201411	7.9
DaguangbaR	201412	7.3
DaguangbaR	201501	2
DaguangbaR	201502	4
DaguangbaR	201503	1
DaguangbaR	201504	2.8
DaguangbaR	201505	2.9
DaguangbaR	201506	7.2
DaguangbaR	201507	1.5
DaguangbaR	201508	3.2
DaguangbaR	201509	3.2
DaguangbaR	201510	3.6
DaguangbaR	201511	3.2
DaguangbaR	201512	1.3
DaguangbaR	201601	4.6
DaguangbaR	201602	1.4
DaguangbaR	201603	2.2
DaguangbaR	201604	2.3
DaguangbaR	201605	2
DaguangbaR	201606	2.1
DaguangbaR	201607	1.6
DaguangbaR	201608	1.3
DaguangbaR	201609	0.8
DaguangbaR	201610	1.2
DaguangbaR	201611	1.1
DaguangbaR	201612	1.8
MiyunR	200701	5.07
MiyunR	200702	4.18
MiyunR	200703	5.02
MiyunR	200704	5.36
MiyunR	200705	3.08
MiyunR	200706	2.12
MiyunR	200707	3.71
MiyunR	200708	4.33
MiyunR	200709	8.33
MiyunR	200710	6.13
MiyunR	200711	3.97
MiyunR	200712	4
MiyunR	200801	3.29
MiyunR	200803	2.63
MiyunR	200804	4.02
MiyunR	200805	4.9
MiyunR	200806	6.19
MiyunR	200807	5.65
MiyunR	200808	3.85
MiyunR	200809	4.88
MiyunR	200810	3.88
MiyunR	200811	2.45
MiyunR	200812	2.53
MiyunR	200901	2.53
MiyunR	200902	2.53
MiyunR	200903	2.53
MiyunR	200904	1.44
MiyunR	200905	2.45
MiyunR	200906	2.45
MiyunR	200907	2.22
MiyunR	200908	3.76
MiyunR	200909	3.46
MiyunR	200910	7.3
MiyunR	200911	2.92
MiyunR	200912	3.69
MiyunR	201004	3.13
MiyunR	201005	3.5
MiyunR	201006	4.6
MiyunR	201007	2.3
MiyunR	201008	5.58
MiyunR	201009	3.15
MiyunR	201010	4.64
MiyunR	201011	1.053
MiyunR	201012	1.384
MiyunR	201101	1.88
MiyunR	201102	1.384
MiyunR	201103	2.63
MiyunR	201104	2.4
MiyunR	201105	1.33
MiyunR	201106	4.23
MiyunR	201107	3.36
MiyunR	201108	3.03
MiyunR	201109	4.76
MiyunR	201110	5.85
MiyunR	201111	8.08
MiyunR	201112	3.73
MiyunR	201201	6.1
MiyunR	201202	4.64
MiyunR	201203	4.98
MiyunR	201204	2.07
MiyunR	201205	3.61
MiyunR	201206	5
MiyunR	201207	3.21
MiyunR	201208	5.88
MiyunR	201209	4.27
MiyunR	201210	6.47
MiyunR	201211	3.83
MiyunR	201212	5.62
MiyunR	201501	5.9
MiyunR	201502	5.24
MiyunR	201503	3.62
MiyunR	201504	4.04
MiyunR	201505	5.66
MiyunR	201506	6.28
MiyunR	201507	2.78
MiyunR	201508	4.23
MiyunR	201509	5.99
MiyunR	201510	5.68
MiyunR	201511	6.62
MiyunR	201512	4.7
MiyunR	201601	6.53
MiyunR	201602	7.46
MiyunR	201603	3.6
MiyunR	201604	4.56
MiyunR	201605	5.72
MiyunR	201606	4.17
MiyunR	201607	6.15
MiyunR	201608	3.24
MiyunR	201609	5.87
MiyunR	201610	2.8
MiyunR	201611	1.66
MiyunR	201612	4.43
Baiyangdian	200701	33.62
Baiyangdian	200702	57.125
Baiyangdian	200703	16.38
Baiyangdian	200704	11.92
Baiyangdian	200705	18.48
Baiyangdian	200706	27.28
Baiyangdian	200707	47.14
Baiyangdian	200708	48.825
Baiyangdian	200709	82.1
Baiyangdian	200710	67.85
Baiyangdian	200711	24.375
Baiyangdian	200712	14.35
Baiyangdian	200801	5.4
Baiyangdian	200802	3.13333
Baiyangdian	200803	4.34
Baiyangdian	200804	4.7
Baiyangdian	200805	17.94
Baiyangdian	200806	65.07
Baiyangdian	200807	42.76
Baiyangdian	200808	28.5
Baiyangdian	200809	61.18
Baiyangdian	200810	24.06
Baiyangdian	200811	14.1
Baiyangdian	200812	47.96
Baiyangdian	200901	7.7
Baiyangdian	200902	6.6
Baiyangdian	200903	1.98
Baiyangdian	200904	4.56
Baiyangdian	200905	5.4
Baiyangdian	200906	5
Baiyangdian	200907	15.02
Baiyangdian	200908	2.02
Baiyangdian	200909	3.296
Baiyangdian	200910	7.1
Baiyangdian	200911	12.24
Baiyangdian	200912	8.08
Baiyangdian	201001	2.85
Baiyangdian	201002	2.4
Baiyangdian	201003	4.96667
Baiyangdian	201004	10.14
Baiyangdian	201005	10.76
Baiyangdian	201006	4.22
Baiyangdian	201007	2.96
Baiyangdian	201008	6.46
Baiyangdian	201009	3.24
Baiyangdian	201010	3.88
Baiyangdian	201011	4.04
Baiyangdian	201012	4.28
Baiyangdian	201101	1.93333
Baiyangdian	201102	2.5
Baiyangdian	201103	3.1
Baiyangdian	201104	2.54
Baiyangdian	201105	4.4
Baiyangdian	201106	1.52
Baiyangdian	201107	4.1
Baiyangdian	201108	2.66
Baiyangdian	201109	2.26
Baiyangdian	201110	2.28
Baiyangdian	201111	2.62
Baiyangdian	201112	2.28
Baiyangdian	201202	2.28
Baiyangdian	201203	1.72
Baiyangdian	201204	2.32
Baiyangdian	201205	2.14
Baiyangdian	201206	6.12
Baiyangdian	201207	4.94
Baiyangdian	201208	2.8
Baiyangdian	201209	21.82
Baiyangdian	201210	21.82
Baiyangdian	201211	2.02
Baiyangdian	201212	4.26
Baiyangdian	201403	1.994
Baiyangdian	201404	1.886
Baiyangdian	201405	2.226
Baiyangdian	201406	2.128
Baiyangdian	201407	2.008
Baiyangdian	201408	4.33
Baiyangdian	201409	3.822
Baiyangdian	201410	3.152
Baiyangdian	201411	3.034
Baiyangdian	201412	2.688
Baiyangdian	201501	2.65
Baiyangdian	201503	2.27
Baiyangdian	201504	2.1
Baiyangdian	201505	1.916
Baiyangdian	201506	1.772
Baiyangdian	201507	2.022
Baiyangdian	201508	3.502
Baiyangdian	201509	3.764
Baiyangdian	201510	3.066
Baiyangdian	201511	2.866
Baiyangdian	201512	2.49333
Baiyangdian	201602	2.11
Baiyangdian	201603	2.042
Baiyangdian	201604	2.088
Baiyangdian	201605	1.936
Baiyangdian	201606	1.942
Baiyangdian	201607	1.896
Baiyangdian	201608	1.874
Baiyangdian	201609	1.946
Baiyangdian	201610	1.954
Baiyangdian	201611	1.98
Baiyangdian	201612	2.058
YuqiaoR	200703	1.01
YuqiaoR	200704	1.47
YuqiaoR	200705	1.35
YuqiaoR	200706	4.99
YuqiaoR	200707	5.4
YuqiaoR	200708	17.9
YuqiaoR	200709	11.8
YuqiaoR	200710	10.1
YuqiaoR	200711	1.5
YuqiaoR	200804	1.11
[truncated: 1,203 more rows]
