# Supplementary material for: Spatiotemporal changes in chlorophyll-a concentration in China's lakes and its driving factors
Source: Royal Society of Chemistry journal article supplement (doi:10.1039/d4em00731j), 2025-01-01
Supplement: d4em00731j3.xlsx [file d4em00731j3.xlsx]

## Sheet: S3
LakeName	Data	Chla(mg/L)	DO(mg/L)	CODMn(mg/L)	Temperature(mg/L)	pH	BOD(mg/L)	NH3N(mg/L)	TN(mg/L)	TP(mg/L)
BailianheR	201201	0.0004	7.6	1.1	10.5	7.6	2	0.3	0.59	0.03
BailianheR	201202	0.00066	7.8	1.7	7	7.6	2	0.08	0.49	0.05
BailianheR	201203	0.00047	7.8	1.3	9	7.6	2	0.14	0.47	0.03
BailianheR	201204	0.00057	7.2	1.8	18	7.6	2	0.2	0.45	0.04
BailianheR	201205	0.0006	7	2	20	7.5	2	0.18	0.44	0.04
BailianheR	201206	0.00057	7	2.1	25	7.6		0.15	0.46	0.04
BailianheR	201207	0.00056	7.3	2.1	27.5	7.4		0.09	0.29	0.03
BailianheR	201208	0.00052	7.1	2	28	7.5		0.13	0.3	0.04
BailianheR	201209	0.0006	6.8	2.6	27.8	7.5		0.21	0.56	0.03
BailianheR	201210	0.00055	7.5	2.4	23.5	7.5	2	0.18	0.51	0.03
BailianheR	201211	0.00046	8.8	2.2	14.5	7.4	2	0.14	0.36	0.03
BailianheR	201212	0.00048	8.7	2	6.5	7.4		0.18	0.5	0.03
BailianheR	201401	0.00046	8	1.7	6	7.8	2	0.16	0.5	0.03
BailianheR	201402	0.00046	8	1.9	6.1	7.82	1.9	0.19	0.52	0.03
BailianheR	201403	0.00045	8.4	1.9	10.1	7.6	1.9	0.17	0.55	0.03
BailianheR	201404	0.00046	7.9	2.1	16.8	7.72	1.8	0.22	0.59	0.03
BailianheR	201405	0.00036	6.55	2.51	17.2	7.72	1.9	0.144	0.59	0.02
BailianheR	201406	0.00044	6.73	2.1	28	7.62	1.5	0.111	0.49	0.05
BailianheR	201407	0.00123	7.43	2.29	28	7.43	2.8	0.289	1	0.03
BailianheR	201408	0.00133	7.3	2	28	7.43	2.6	0.147	0.85	0.013
BailianheR	201409	0.00654	6.88	3.8	25	7.41	3	0.095	0.97	0.035
BailianheR	201410	0.00333	7.4	2.5	19.5	7.51	2.8	0.188	0.78	0.015
BailianheR	201411	0.00278	8.01	1.68	15	7.24	2.8	0.1	0.5	0.014
BailianheR	201412	0.0003	6.05	2.5	3	8.06	2	0.387	1	0.03
BailianheR	201501	0.0013	7.52	2.9	3	7.96	1.6	0.079	1	0.02
BailianheR	201502	0.0018	7.4	1.9	9.8	7.25	1.9	0.25	0.57	0.02
BailianheR	201503	0.00617	8.4	2.5	10.1	7.12	2.4	0.063	0.93	0.024
BailianheR	201504	0.0007	7.91	3.6	17	7.09	3.3	0.115	0.84	0.036
BailianheR	201505	0.0027	7.6	3.5	23.5	7.03	2.6	0.128	0.59	0.018
BailianheR	201506	0.0007	6.58	3.2	28.2	6.98	1.5	0.121	0.36	0.01
BailianheR	201507	0.0027	7.24	3.6	28.5	7.21	3.5	0.094	0.49	0.042
BailianheR	201508	0.0048	7.3	2.8	32	6.98	2.6	0.032	0.26	0.038
BailianheR	201509	0.0105	5.4	2.8	28	7.03	2.7	0.068	0.38	0.025
BailianheR	201510	0.0046	6.2	2.5	24	6.99	1.6	0.054	0.12	0.034
BailianheR	201511	0.0031	6.6	2.3	19	7.09	2.2	0.029	0.4	0.023
BailianheR	201512	0.0014	7.9	2.3	8.4	7.18	2.2	0.102	0.44	0.021
BailianheR	201601	0.0012	6.5	2.4	10	7.1	2.2	0.104	0.895	0.024
BailianheR	201602	0.0017	7.7	1.2	3	7.1	1.7	0.029	0.6	0.038
BailianheR	201603	0.00525	10.4	1.12	10	8.4	1.5	0.075	0.2	0.022
BailianheR	201604	0.00445	9.1	1.76	14	6.7	1.5	0.079	1.29	0.014
BailianheR	201605	0.00604	12.4	3.36	20	8.7	0.8	0.154	1.84	0.032
BailianheR	201606	0.00573	7.1	2.2	23	8.6	3	0.117	0.74	0.007
BailianheR	201609	0.008	6.7	2.4	23	7.06	2.2	0.31	0.44	0.05
CaiziL	201201	0.00404	8.2	4.73	6	7.65	2.2	0.165	1.58	0.13
CaiziL	201202	0.00228	10	4.9	7.5	7.07		0.149	1.15	0.076
CaiziL	201203	0.00146	8	3.66	9	7.44	2	0.406	0.63	0.077
CaiziL	201204	0.00224	8	3.66	16.2	7.8	2	0.158	0.93	0.079
CaiziL	201205	0.00212	7.2	4.12	17.8	8	2	0.554	1.1	0.054
CaiziL	201206	0.0023	6	5.64	24.1	7.85	1	0.066	0.953	0.042
CaiziL	201207	0.00307	7	5.16	23.7	7.98	2	0.174	0.79	0.045
CaiziL	201208	0.0059	7.5	5.44	28.7	8.02	3.5	0.112	0.745	0.042
CaiziL	201209	0.00409	6.2	3.55	25.9	7.12	2	0.111	0.539	0.039
CaiziL	201210	0.00263	8.21	4.38	22.1	7.18	2.3	0.137	0.686	0.04
CaiziL	201211	0.00425	10.07	4.76	10.3	7.61	2.3	0.272	0.766	0.047
CaiziL	201212	0.00214	11.67	4.14	6.7	7.56	2	0.09	0.95	0.048
CaiziL	201401	0.00171	13.44	3.7	3	8.2	2.2	0.174	1	0.099
CaiziL	201402	0.00156	13.08	2.71	1.3	8.38	2.1	0.398	1.23	0.05
CaiziL	201403	0.00221	10.46	3.32	6.7	7.55	1	0.436	1.79	0.044
CaiziL	201404	0.00404	8.21	3.65	12.9	7.28	2.8	0.148	1.22	0.066
CaiziL	201405	0.00202	7.25	4.62	19	7.11	1	0.114	0.919	0.048
CaiziL	201406	0.00209	5.28	4.46	22.8	7.13	1	0.117	1.11	0.13
CaiziL	201407	0.00189	6.43	5	23.9	7.53	3	0.34	0.56	0.052
CaiziL	201408	0.00233	7.01	4.74	29.1	7.67	1	0.077	0.55	0.087
CaiziL	201409	0.0017	6.5	4.77	24.6	6.62	2.5	0.106	1.57	0.094
CaiziL	201410	0.00202	5.72	4.08	21.3	6.67	3	0.144	0.88	0.05
CaiziL	201411	0.00213	5.75	4.98	16	6.58	2.2	0.187	0.9	0.076
CaiziL	201412	0.00236	10.4	4.41	7.7	6.95	1	0.127	1.41	0.059
CaiziL	201501	0.00119	10.56	4.74	5.6	7.85	2.1	0.548	1.1	0.074
CaiziL	201502	0.00232	9.64	3.14	4.5	7.48	2.6	0.308	1.34	0.074
CaiziL	201503	0.00188	10.85	4.78	5.1	7.52	2.8	0.33	1.09	0.055
CaiziL	201504	0.00266	11.14	4.78	5	8.03	0.4	0.275	0.447	0.012
CaiziL	201505	0.00286	6.8	3.05	22.6	8.01	1.6	0.689	0.566	0.024
CaiziL	201506	0.00188	7.67	4.08	25.9	7.34	1.6	0.407	0.542	0.042
CaiziL	201507	0.00212	7.29	3.84	21.6	6.89	1.8	0.57	0.385	0.068
CaiziL	201508	0.00231	7.51	4.54	22	6.95	1	0.433	0.49	0.031
CaiziL	201509	0.00272	7.52	4.2	22	6.65	1	0.485	0.6	0.024
CaiziL	201510	0.00497	5.6	3.96	17.6	7.22	1	0.537	0.569	0.042
CaiziL	201511	0.00634	7.25	4.16	12.7	6.83	1	0.729	0.715	0.033
CaiziL	201512	0.00814	10.05	3.27	8.2	6.95	1	0.623	0.647	0.037
CaiziL	201601	0.00424	8.1	3.54	11.2	7.2	1	0.647	0.636	0.034
CaiziL	201602	0.00174	7.2	3.47	5	7.1	0.6	0.477	0.6	0.033
CaiziL	201603	0.00116	8.2	2.45	10.2	7	0.6	0.36	0.558	0.034
CaiziL	201604	0.00173	7.8	2.37	13.8	7.6	0.7	0.207	0.976	0.015
CaiziL	201605	0.00129	6.5	1.8	19.3	7.4	0.7	0.732	0.668	0.018
CaiziL	201606	0.0016	8.9	3.51	22.8	6.9	0.7	0.313	0.762	0.015
CaiziL	201607	0.00181	7.1	4.16	17.4	6.94	0.7	0.18	0.851	0.036
CaiziL	201608	0.00209	7.41	3.8	30.6	7.37	0.7	0.314	0.574	0.034
CaiziL	201609	0.00177	8.48	3.8	27	7.2	0.7	0.497	0.751	0.04
CaiziL	201610	0.001806	7.72	3.96	19.8	6.92	0.8	0.565	0.668	0.003
CaiziL	201611	0.001767	7.25	4.21	13.2	7.08	1.3	0.293	0.48	0.036
CaiziL	201612	0.002138	11.12	3.88	9.7	6.78	0.8	0.738	0.751	0.034
Chenghai	201201	0.011	7.2	4.2	13	9.24		0.07	0.7	0.03
Chenghai	201202	0.016	8.4	3.6	12.5	9.18		0.08	0.4	0.02
Chenghai	201203	0.012	7.7	3.8	11	9.31		0.16	0.72	0.02
Chenghai	201204	0.008	7.9	3.4	13.5	9.27		0.11	0.5	0.02
Chenghai	201205	0.008	8	3.7	19.5	9.14		0.205	0.8	0.02
Chenghai	201206	0.008	6.5	3.81	23	9.16		0.16	0.77	0.01
Chenghai	201207	0.006	6	4.1	24.5	9.08		0.125	0.64	0.02
Chenghai	201208	0.005	8.3	4	24	9.25		0.17	0.63	0.01
Chenghai	201209	0.006	5.9	4.4	22.5	9.09		0.15	0.66	0.01
Chenghai	201210	0.006	6	3.8	23.5	9.24		0.19	0.68	0.01
Chenghai	201211	0.008	6	3.1	20.5			0.13	0.55	0.01
Chenghai	201212	0.006	4.7	3.4	15	9.23		0.13	0.61	0.02
Chenghai	201401	0.011	8.2	3.9	12	9.3		0.04	0.8	0.04
Chenghai	201402	0.011	7.3	4.2	14	9.34		0.08	0.74	0.04
Chenghai	201403	0.011	7.2	4	15	9.36		0.22	0.62	0.03
Chenghai	201404	0.01	7	4.3	17	9.25		0.33	0.59	0.03
Chenghai	201405	0.015	8	3.8	20	9.19		0.15	0.54	0.04
Chenghai	201406	0.004	7.7	4	22	9.32		0.19	0.62	0.02
Chenghai	201407	0.007	5.8	5	27	9.31		0.18	0.59	0.03
Chenghai	201408	0.006	5.4	4.7	25	9.33		0.14	0.56	0.02
Chenghai	201409	0.006	6.7	4.6	23	9.33		0.11	0.42	0.02
Chenghai	201410	0.005	6.1	3.9	26	9.34		0.09	0.67	0.01
Chenghai	201411	0.005	5.4	3.6	22	9.29		0.06	0.5	0.02
Chenghai	201412	0.005	5.8	3.9	17	9.23		0.15	0.57	0.04
Chenghai	201501	0.013	7.8	4	12	9.2	0.7	0.15	0.69	0.04
Chenghai	201502	0.011	8.2	3	14	9.28	0.6	0.08	0.68	0.05
Chenghai	201503	0.007	7.8	3	14	9.27	2	0.09	0.74	0.05
Chenghai	201504	0.007	8	3.6	17	9.19	1.4	0.08	0.75	0.05
Chenghai	201505	0.0005	7.8	4.7	20	9.21	0.8	0.07	0.7	0.05
Chenghai	201506	0.002	6.9	4.7	23	9.16	1.3	0.14	0.71	0.05
Chenghai	201507	0.001	7.2	4.3	25	9.16	0.9	0.04	0.72	0.04
Chenghai	201508	0.0028	6.9	4.2	25	9.23	1.2	0.08	0.87	0.04
Chenghai	201509	0.004	7.9	4.2	24	9.32	1.4	0.14	0.71	0.02
Chenghai	201510	0.003	5.2	4.9	23	9.27	0.9	0.18	0.87	0.04
Chenghai	201511	0.002	5	4.5	20	9.27	1.6	0.09	0.77	0.04
Chenghai	201512	0.006	7	5	18	9.32	1.4	0.15	0.76	0.05
Chenghai	201601	0.003	6.6	4.5	14.8	9.3	1.3	0.14	0.69	0.04
Chenghai	201602	0.007	8.2	4.7	11.5	9.3	1.8	0.13	0.73	0.05
Chenghai	201603	0.003	8	5	14.5	9.3	1.3	0.1	0.79	0.04
Chenghai	201604	0.007	7.6	5.1	15.5	9.2	1	0.11	0.61	0.05
Chenghai	201605	0.008	7.5	5.3	19.5	9.2	1.5	0.08	0.71	0.05
Chenghai	201606	0.007	7.7	4.2	22	9.2	1.2	0.08	0.73	0.02
Chenghai	201607	0.005	8.2	4.2	25.4	9.27	2.8	0.11	0.77	0.03
Chenghai	201608	0.004	8.2	4.3	24.8	9.26	1.1	0.076	0.77	0.04
Chenghai	201609	0.004	6.5	4.3	26.8	9.29	0.9	0.081	0.77	0.005
Chenghai	201610	0.005	7.4	5.1	23.9	9.26	1.4	0.16	0.89	0.02
Chenghai	201611	0.005	5.7	4.9	22.4	9.23	1	0.15	0.83	0.04
Chenghai	201612	0.005	4.4	5.5	18.9	9.18	1.2	0.14	0.9	0.03
DianshanL	201201	0.00112	11.2	4.68	5.5	7.4	2.87	2.16	4.96	0.253
DianshanL	201202	0.00542	9.41	4.3	5.4	7.46	3.12	1.52	4.7	0.11
DianshanL	201203	0.0069	8.35	4.33	6.7	7.46	3.48	2.44	5.56	0.254
DianshanL	201204	0.0176	7.36	5.9	16.6	7.63	4.53	1.66	4.13	0.199
DianshanL	201205	0.00268	6.3	4.93	22.3	7.42	4.6	2.21	4.59	0.235
DianshanL	201206	0.00483	6.44	4.55	23.6	7.65	3.68	1.01	3.14	0.196
DianshanL	201207	0.0115	6.36	6.04	30.6	7.52	3.46	0.78	3.32	0.214
DianshanL	201208	0.00464	5.26	5.95	31.4	7.3	3.08	0.62	3.2	0.278
DianshanL	201209	0.00422	5.5	5.42	26.6	7.6	3.16	0.52	2.26	0.21
DianshanL	201210	0.0111	5.36	5.6	23.2	7.4	2.9	0.94	3.08	0.266
DianshanL	201211	0.00417	4.44	4.96	18.2	7.24	2.75	1.69	3.94	0.224
DianshanL	201212	0.00549	9.46	4.12	10.5	7.54	2.34	0.92	3.64	0.384
DianshanL	201401	0.0039	10.92	4.14	5.8	7.72	3.4	1.56	3.98	0.097
DianshanL	201402	0.00394	10.65	4.2	5.7	7.91	3.12	1.51	4.18	0.1
DianshanL	201403	0.00333	7.92	3.78	10.1	7.52	2.63	1.8	5.31	0.13
DianshanL	201404	0.00398	10.15	4	17.7	7.78	2.96	1.23	3.99	0.088
DianshanL	201405	0.00553	6.96	4.13	22.4	7.7	3.04	1.17	3.78	0.1
DianshanL	201406	0.00398	4.75	4	25.1	7.68	2.58	1.42	3.85	0.12
DianshanL	201407	0.00815	5.85	3.3	24.9	7.66	3.02	0.81	4.06	0.12
DianshanL	201408	0.021	9.68	5.82	32.9	8.1	4.81	0.3	2.525	0.154
DianshanL	201409	0.00248	4.5	4.56	27.4	7.72	2.9	0.87	2.62	0.194
DianshanL	201410	0.00402	5.2	3.34	22.4	7.68	2.48	0.34	2.06	0.085
DianshanL	201411	0.00616	6.93	3.69	18.1	7.86	2.88	0.62	2.76	0.142
DianshanL	201412	0.00275	9.14	3.85	12.4	7.64	2.52	0.98	2.15	0.11
DianshanL	201501	0.0105	10.71	4.56	7.2	7.66	3.04	1.32	3.78	0.115
DianshanL	201502	0.005	7.84	4.65	6.4	7.54	3.15	1.17	4.43	0.161
DianshanL	201503	0.0073	6.69	3.8	8.6	7.71	2.76	0.12	3.38	0.115
DianshanL	201504	0.0061	7.18	3.96	13.8	7.84	2.24	0.68	3.35	0.094
DianshanL	201505	0.0146	4.43	4.48	21.7	7.87	2.62	0.86	2.98	0.133
DianshanL	201506	0.0051	6.08	4.28	23.8	7.71	2.18	0.86	2.98	0.153
DianshanL	201507	0.0044	2.25	4.34	25.4	7.53	2.52	1.6	3.77	0.186
DianshanL	201508	0.0108	7.23	4.84	32.9	8.07	3.08	0.28	1.56	0.24
DianshanL	201509	0.016	7.92	4.75	29	8.06	2.93	0.3	1.92	0.13
DianshanL	201510	0.0062	5.32	4.25	21.6	7.65	2.2	0.96	2.72	0.16
DianshanL	201511	0.0049	7.97	3.74	11.8	7.6	2.44	1.14	3.1	0.09
DianshanL	201601	0.0118	8.2	3.79	9.8	7.7	2.71	0.82	3.1	0.093
DianshanL	201602	0.00643	10.3	4.38	4.2	7.7	2.83	1.32	3.66	0.084
DianshanL	201603	0.0125	8.2	4.84	10.2	7.6	2.86	1.05	3.27	0.08
DianshanL	201604	0.0121	7.3	3.98	15.9	8	2.8	1.06	3.64	0.078
DianshanL	201605	0.0142	9.2	5.34	22	8.4	3.3	0.32	2.54	0.086
DianshanL	201606	0.00624	7.8	3.55	23	8	2.06	0.92	2.37	0.158
DianshanL	201607	0.0148	4.96	4.08	28.1	8.01	2.39	1.14	2.9	0.099
DianshanL	201608	0.0189	6.82	4.62	31.5	8.26	2.22	0.23	0.91	0.23
DianshanL	201609	0.0228	5.7	5	28.2	8.18	2.36	0.27	1.48	0.217
DianshanL	201610	0.00487	6.39	3.86	21	7.71	2.22	0.49	1.98	0.125
DianshanL	201611	0.0112	7.25	3.49	17.5	7.46	2.42	0.88	2.28	0.152
DianshanL	201612	0.0042	6.96	3.56	11.2	7.42	2.34	0.96	2.44	0.13
DongjiangR	201208	0.00321	7.03	1	14	7.24	0.95	0.1235	0.146	0.005
DongjiangR	201209	0.003195	7.2	1	12.35	7.255	0.635	0.1175	0.278	0.005
DongjiangR	201210	0.00325	7.385	0.75	18	7.165	0.63	0.134	0.145	0.005
DongjiangR	201211	0.003305	7.22	0.7	8.5	7.15	0.75	0.103	0.1645	0.005
DongjiangR	201212	0.003305	6.925	0.75	8	7.08	0.53	0.1235	0.1675	0.005
DongjiangR	201401	0.0031	8.48167	0.65	7	7.39833	0.865	0.0346667	0.025	0.005
DongjiangR	201402	0.002905	8.12833	0.55	6	7.16167	0.938333	0.02575	0.025	0.005
DongjiangR	201403	0.00256667	9.15333	0.6	7	7.51	0.638333	0.117333	0.616833	0.005
DongjiangR	201404	0.00217667	8.28	0.65	9.5	6.805	0.636333	0.163333	1.0035	0.005
DongjiangR	201405	0.00181333	8.545	0.425	8	7.12	0.558333	0.041	0.923333	0.005
DongjiangR	201406	0.001575	8.33167	0.65	7.5	6.955	0.616667	0.1085	0.962833	0.005
DongjiangR	201407	0.00222833	8.55333	0.75	12.5	7.095	0.638333	0.0753333	1.06033	0.005
DongjiangR	201408	0.00192333	8.835	0.6	20	6.87	0.615	0.0496667	1.09283	0.005
DongjiangR	201409	0.00192833	8.32667	0.6	17.5	7.13667	0.67	0.041	1.47283	0.005
DongjiangR	201410	0.001885	8.18167	0.8	15	6.865	0.68	0.046	0.911833	0.005
DongjiangR	201411	0.0021	8.505	0.7		6.82	0.561667	0.06	0.952833	0.005
DongjiangR	201412	0.00202167	9.1	0.475	15	6.905	0.725	0.149667	0.999333	0.005
DongjiangR	201501	0.00246	8.53	0.7	10.15	6.9	0.59	0.059	1.15	0.005
DongjiangR	201502	0.0024733	9.04	0.7	2	6.865	0.655	0.1005	1.206	0.005
DongjiangR	201503	0.0019783	9.18	0.565	8.35	6.93	0.115	0.013	1.017	0.005
DongjiangR	201504	0.00198	8.295	0.68	12	6.87	0.815	0.198	0.401	0.005
DongjiangR	201505	0.00205835	7.945	0.81	12.5	6.885	1.055	0.3155	0.5735	0.005
DongjiangR	201506	0.00263165	8.49	0.75	12	6.995	0.65	0.368	0.6555	0.005
DongjiangR	201507	0.00219335	7.25	0.95	8	7.105	0.885	0.236	0.937	0.005
DongjiangR	201508	0.00199	7.915	0.65	20	7.27	0.915	0.3105	0.9315	0.005
DongjiangR	201509	0.00220835	6.96	0.865	18.5	7.19	0.9	0.308	0.8665	0.005
DongjiangR	201510	0.0023083	7.31	0.75	16.95	7.19	1	0.3615	0.6665	0.003
DongjiangR	201511	0.00241835	7.17	0.7	20.5	7.185	0.9	0.3995	0.81	0.005
DongjiangR	201512	0.00226835	7.57	0.665	15	7.18	0.8	0.342	0.665	0.005
DongjiangR	201601	0.0023965	7.55	0.5	12.5	7.2	0.85	0.3695	0.6735	0.005
DongjiangR	201602	0.002157	7.75	0.375	7.9	7.15	0.8	0.292	0.63	0.005
DongjiangR	201603	0.0021465	7.55	0.25	10	7.1	0.85	0.2635	0.5	0.005
DongjiangR	201604	0.0021965	7.6	0.5	10	7.4	1.035	0.108	0.51	0.003
DongjiangR	201605	0.001797	7.65	0.25	14.5	7.15	0.885	0.065	0.1965	0.0085
DongjiangR	201606	0.00164	7.65	0.25	14.65	7.2	0.8	0.098	0.21	0.0085
DongjiangR	201607	0.0021617	7.6	0.6	18	7.88	0.9	0.08	0.217	0.008
DongjiangR	201608	0.00193	8.79	0.6	25.2	8.565	2.15	0.0755	0.2135	0.0075
DongjiangR	201609	0.00234665	7.865	0.5	28.55	7.205	1.435	0.0965	0.2335	0.008
DongjiangR	201610	0.00211	7.715	0.5	24.5	7.795	1.335	0.1305	0.761	0.008
DongjiangR	201611	0.0059317	7.515	0.25	21.8	7.515	1.485	0.0605	0.8485	0.0085
DongjiangR	201612	0.002305	7.5	0.5	18.5	7.61	1.165	0.0305	0.18	0.009
FuxianL	201201	0.0025	7.6	0.84	14.5	8.5		0.042	0.15
FuxianL	201202	0.00367	7.8	0.69	13	8.19		0.059	0.16
FuxianL	201203	0.00341	7.9	0.82	13.5	8.23		0.046	0.13
FuxianL	201204	0.001	8.1	0.98	16.5	8.36		0.043	0.17
FuxianL	201205	0.00091	7.8	0.98	17.5	8.43		0.044	0.14
FuxianL	201206	0.00137	7.8	1.14	22	8.55	1	0.042	0.16	0.005
FuxianL	201207	0.00152	7.8	1.06	21.8	8.64	1	0.043	0.18	0.005
FuxianL	201208	0.00142	7.8	0.93	22.8	8.57	1	0.048	0.17	0.005
FuxianL	201209	0.0015	7.9	0.97	22.3	8.7	1	0.045	0.14	0.005
FuxianL	201210	0.00169	7.8	0.93	20.5	8.72	1	0.055	0.16	0.005
FuxianL	201211	0.00226	7.7	1.07	18.5	8.59	1	0.041	0.16	0.005
FuxianL	201212	0.00169	7.8	0.91	16.3	8.57		0.044	0.16
FuxianL	201401	0.00193	7.7	1.08	15	8.46	1	0.04	0.16	0.005
FuxianL	201402	0.00367	8	1.13	14.3	8.43	1	0.044	0.16	0.005
FuxianL	201403	0.00256	7.5	1.06	14.8	8.32	1	0.044	0.14	0.005
FuxianL	201404	0.00154	8	1.16	15.5	8.56	1	0.046	0.15	0.005
FuxianL	201405	0.00173	7.8	1.37	18.3	8.63	0.58	0.046	0.15	0.005
FuxianL	201406	0.00107	7	1.67	23.5	8.65	0.6	0.038	0.18	0.005
FuxianL	201407	0.00176	7.5	1.47	23	8.78	0.6	0.042	0.16	0.005
FuxianL	201408	0.00267	7.8	1.49	23.5	8.84	0.6	0.038	0.16	0.005
FuxianL	201409	0.00215	7.5	1.46	23.5	8.84	0.8	0.061	0.15	0.005
FuxianL	201410	0.00272	7.5	1.52	19.8	8.73	0.9	0.044	0.12	0.005
FuxianL	201411	0.00236	7.9	1.47	18.8	8.7	0.7	0.051	0.16	0.005
FuxianL	201412	0.00168	7.5	1.86	15.8	8.65	1	0.037	0.16	0.005
FuxianL	201501	0.0014	7.5	1.2	13	8.52	1.1	0.041	0.18	0.005
FuxianL	201502	0.0022	7.6	1.52	13	8.44	1.1	0.043	0.17	0.005
FuxianL	201503	0.0038	8.4	1.48	14.8	8.44	0.8	0.046	0.14	0.005
FuxianL	201504	0.0038	8.4	1.69	17	8.63	1.4	0.049	0.15	0.005
FuxianL	201505	0.002	8.1	1.62	18.8	8.74	1.3	0.042	0.16	0.005
FuxianL	201506	0.002	7.5	1.33	21.5	8.78	1	0.05	0.18	0.005
FuxianL	201507	0.0025	7.6	1.63	23.5	8.87	1.1	0.061	0.17	0.005
FuxianL	201508	0.0021	7.6	1.51	22.5	8.87	0.9	0.077	0.16	0.005
FuxianL	201509	0.0027	7.7	1.64	23.3	8.89	0.9	0.055	0.15	0.005
FuxianL	201510	0.0023	7.6	1.69	22.3	8.64	1.2	0.044	0.18	0.005
FuxianL	201511	0.0025	7.9	1.38	19.3	8.83	1.2	0.058	0.19	0.005
FuxianL	201512	0.0032	7.6	1.47	17.8	8.88	0.9	0.06	0.2	0.005
FuxianL	201601	0.0023	7.6	1.25	14.3	8.7	1	0.058	0.19	0.005
FuxianL	201602	0.0017	7.5	1.2	13	8.4	0.9	0.048	0.185	0.005
FuxianL	201603	0.0039	7.7	1.37	13.8	8.5	0.7	0.06	0.19	0.005
FuxianL	201604	0.0039	8.7	1.37	16.5	8.7	1.3	0.06	0.17	0.005
FuxianL	201605	0.0016	7.8	1.44	18.5	8.6	0.6	0.052	0.15	0.005
FuxianL	201606	0.0024	7.6	1.45	21.8	8.8	0.9	0.058	0.15	0.005
FuxianL	201607	0.0015	7.5	1.62	22.8	8.93	0.9	0.058	0.17	0.005
FuxianL	201608	0.0016	7.5	1.2	24	8.82	0.8	0.051	0.16	0.005
FuxianL	201609	0.0022	7.8	1.33	23.8	8.83	0.7	0.044	0.19	0.005
FuxianL	201610	0.0019	7.5	1.36	21.6	8.82	0.8	0.056	0.16	0.005
FuxianL	201611	0.0023	7.6	1.45	20.6	8.75	0.8	0.071	0.15	0.005
FuxianL	201612	0.0025	7.5	1.47	17.5	8.68	1.1	0.051	0.19	0.005
FutouL	201201	0.0153	10.265	3.36	7.45	7.815	2.425	0.155	0.415	0.0195
FutouL	201202	0.0094	10.965	3.475	3.7	7.75	2.4	0.1945	0.425	0.0105
FutouL	201203	0.0086	9.26	3.37	6.7	7.94	2.335	0.1825	0.38	0.022
FutouL	201204	0.0096	8.785	3.485	17.3	8.09	2.405	0.1355	0.365	0.0205
FutouL	201205	0.01055	8.565	3.5	24.5	7.88	2.75	0.17	0.445	0.023
FutouL	201206	0.0097	8.125	3.595	24.05	7.825	2.755	0.1965	0.45	0.023
FutouL	201207	0.0111	8.33	3.575	30.3	7.88	2.55	0.1785	0.415	0.024
FutouL	201208	0.0115	8.395	3.84	30.6	7.895	2.57	0.2035	0.42	0.023
FutouL	201209	0.01055	7.5	3.45	28.25	7.745	2.15	0.2665	0.435	0.0225
FutouL	201210	0.0101	8.27	3.2	24.15	7.865	2.1	0.146	0.4	0.0165
FutouL	201211	0.01495	9.465	3.55	16.9	7.98	1.6	0.2655	0.445	0.021
FutouL	201212	0.01495	9.655	3.45	10.85	7.965	2.45	0.269	0.43	0.0225
FutouL	201401	0.009575	9.525	3.25	10.2	7.735	2.1	0.309	0.487	0.024
FutouL	201402	0.00836	10.775	3.4	5.9	7.88	2.3	0.2955	0.44	0.022
FutouL	201403	0.00937	9.475	3.15	9.5	7.835	2.1	0.3115	0.459	0.023
FutouL	201404	0.010005	8.385	3.25	21.45	7.77	2.1	0.3125	0.468	0.022
FutouL	201405	0.0082	8.875	3.2	23.2	7.76	2.05	0.269	0.448	0.0215
FutouL	201406	0.009945	9.175	3.25	22.6	7.985	2.25	0.1875	0.453	0.022
FutouL	201407	0.01045	8.56	3.7	25.9	7.76	2.4	0.282	0.474	0.024
FutouL	201408	0.009495	8.57	3.75	31.35	7.69	2.15	0.272	0.4835	0.024
FutouL	201409	0.0091	8.57	3.35	28	7.785	2.15	0.1705	0.449	0.0225
FutouL	201410	0.01	9.35	3.4	23.55	7.735	2.5	0.217	0.433	0.0235
FutouL	201411	0.00968	9.445	3.45	18.2	7.735	2.9	0.189	0.3915	0.022
FutouL	201412	0.0105	10.27	3.5	12.75	7.92	1.95	0.3025	0.482	0.0225
FutouL	201501	0.011925	10.665	3.4	10.85	7.74	2.7	0.273	0.427	0.0235
FutouL	201502	0.01411	11.215	3.45	8.05	7.815	2.6	0.302	0.479	0.03
FutouL	201503	0.01364	10.45	3.55	12	7.875	2.7	0.2615	0.492	0.0355
FutouL	201504	0.01243	9.22	3.3	17	7.735	2.5	0.205	0.4495	0.0355
FutouL	201505	0.01078	8.855	3.25	21.95	7.895	1.95	0.214	0.439	0.0225
FutouL	201506	0.012615	8.42	3.6	25.15	7.885	2.8	0.2	0.4515	0.0355
FutouL	201507	0.010295	8.095	3.4	32.3	7.865	2.7	0.2145	0.4695	0.0225
FutouL	201508	0.012735	8.47	3.15	31.25	7.685	3.05	0.2505	0.453	0.032
FutouL	201509	0.01449	8.415	3.45	29.2	7.905	2.5	0.263	0.482	0.0365
FutouL	201510	0.00997	8.685	3.4	21.25	7.85	2.1	0.3345	0.7995	0.04
FutouL	201511	0.01462	9.635	3.95	16.7	7.705	2.8	0.394	0.7335	0.054
FutouL	201512	0.01327	10.27	4.2	9.75	7.885	2.8	0.3605	0.84	0.044
FutouL	201601	0.011805	9.8	4.6	8.4	7.9	2.9	0.42	0.8025	0.0405
FutouL	201602	0.01222	11.15	4.45	8.25	7.95	2.9	0.4225	0.666	0.039
FutouL	201603	0.009775	8.8	4.15	12.3	7.9	1.95	0.263	0.5635	0.0365
FutouL	201604	0.01169	9.15	3.4	19.25	8.05	2.35	0.292	0.5935	0.0365
FutouL	201605	0.01429	9.5	3.7	24.15	8	2.2	0.136	0.5105	0.0285
FutouL	201606	0.01545	9.65	3.5	28	8	2.4	0.149	0.375	0.022
FutouL	201608	0.01373	8.655	3.8	29.3	7.885	2.75	0.2245	0.475	0.033
FutouL	201609	0.012005	8.57	3.55	26.55	7.965	2.05	0.1425	0.501	0.027
FutouL	201610	0.018035	9.105	3.65	24.2	7.7	2.7	0.1235	0.58	0.0335
FutouL	201611	0.01744	10.05	4.25	16.2	8.16	2.9	0.4005	0.695	0.0515
FutouL	201612	0.015835	10.14	4.1	11.25	7.845	3.1	0.3695	0.691	0.0295
FushuiR	201201	0.0017	9.09	2.8	10.8	7.47	1	0.297	0.7	0.044
FushuiR	201202	0.01	11.21	4	9.3	8.14	1	0.27	0.96	0.034
FushuiR	201203	0.0098	9.3	4.1	9.3	8.2	1	0.273	0.86	0.035
FushuiR	201204	0.0112	10.33	3.3	18.4	8.39	1	0.102	0.89	0.046
FushuiR	201205	0.0114	10.17	3.5	22.3	8.44	3.7	0.132	0.95	0.045
FushuiR	201206	0.0114	9.97	3.3	23.3	8.21	3.7	0.193	0.97	0.047
FushuiR	201207	0.0052	9.4	3.1	30.6	8.09		0.252	0.93	0.042
FushuiR	201208	0.0055	9.19	3.5	30.4	7.13	2.3	0.218	0.92	0.044
FushuiR	201209	0.0051	9	3.3	28.4	7.01	2.1	0.202	0.95	0.041
FushuiR	201210	0.0052	9.05	3.2	23.5	7.11	2.3	0.212	0.88	0.035
FushuiR	201211	0.0253	8.34	2.6	18.5	8.16	1	0.137	0.75	0.045
FushuiR	201212	0.0248	8.88	2.5	10.5	8.07		0.126	0.72	0.041
FushuiR	201401	0.0136	8.3	4	7	7.4	2.2	0.102	0.47	0.024
FushuiR	201403	0.013	8.2	3.8	6	7.07	1.9	0.104	0.48	0.028
FushuiR	201405	0.0139	8.1	4	19	6.94	1.8	0.114	0.56	0.025
FushuiR	201408	0.0228	7.9	2.1	25	6.94	1.7	0.12	0.54	0.028
FushuiR	201411	0.0194	8.2	2.2	15	7.46	1.6	0.138	0.45	0.026
FushuiR	201501	0.0174	10.29	3.4	12.3	8.36	3.3	0.446	0.911	0.042
FushuiR	201502	0.0175	10.24	3.2	10.2	8.45	3.5	0.413	0.929	0.045
FushuiR	201503	0.0171	9.97	3.6	14.1	8.46	3.2	0.463	0.932	0.047
FushuiR	201504	0.0162	9.45	3	15.9	8.29	3	0.386	0.84	0.044
FushuiR	201505	0.0182	9.97	3.5	20.2	8.45	3.1	0.46	0.938	0.042
FushuiR	201506	0.0202	10.47	3.9	24.5	8.9	3.2	0.488	0.948	0.05
FushuiR	201507	0.0165	10.14	3.7	28.6	8.37	3.4	0.443	0.92	0.044
FushuiR	201508	0.0165	9.76	3.3	27.6	8.73	3.6	0.447	0.961	0.047
FushuiR	201509	0.0164	9.88	3.9	26.8	8.46	3.4	0.417	0.974	0.049
FushuiR	201510	0.0152	10.07	3.5	20.9	8.65	3.6	0.412	0.97	0.049
FushuiR	201511	0.0178	10.4	3.8	15.3	8.54	3.2	0.436	0.982	0.044
FushuiR	201512	0.0143	9.1	2.6	13.5	8.65	3.8	0.193	0.54	0.038
FushuiR	201601	0.00243	8.7	4.3	11.5	7.9	3.4	0.232	0.484	0.048
FushuiR	201602	0.00543	11.8	4.2	9.7	8.3	3.3	0.175	0.967	0.028
FushuiR	201603	0.00301	11.4	3.8	11.9	8.4	2.8	0.328	0.806	0.045
FushuiR	201604	0.00274	10.3	2.7	19.5	8.4	3.2	0.142	0.996	0.048
FushuiR	201605	0.00141	8.8	3.5	22.2	8.9	3	0.088	0.806	0.045
FushuiR	201606	0.00517	10.9	3.7	26.4	8.6	3.7	0.091	0.858	0.042
FushuiR	201608	0.01032	10.51	4.6	30.1	8.13	3.3	0.342	0.779	0.047
FushuiR	201609	0.0029	9.93	4.2	23.7	8.05	3	0.321	0.818	0.039
FushuiR	201610	0.00464	7.9	2.4	22.4	7.72	2.5	0.119	0.3	0.031
FushuiR	201611	0.00553	7.66	2.9	18.1	7.85	3	0.342	0.53	0.026
FushuiR	201612	0.00333	8.47	2.2	15.1	8.01	3.1	0.345	0.431	0.028
GeheyanR	201201	0.00223	7.66	1.3	12.2	8	0.93	0.08	0.42	0.02
GeheyanR	201202	0.00216	7.82	1.3	11.6	7.8	0.92	0.07	0.45	0.01
GeheyanR	201203	0.00123	8.94	1.4	11	8.1	0.4	0.06	0.43	0.02
GeheyanR	201204	0.00183	9.94	1.5	17	7.9	0.88	0.08	0.42	0.02
GeheyanR	201205	0.00201	8.29	1.5	21.5	8	0.65	0.04	0.42	0.02
GeheyanR	201206	0.00187	8.16	1.4	22	7.7	0.68	0.07	0.4	0.02
GeheyanR	201207	0.00108	7.92	1.3	29	8	0.64	0.1	0.39	0.012
GeheyanR	201208	0.00201	7.12	1.5	23.5	7.9	0.85	0.06	0.37	0.014
GeheyanR	201209	0.00155	7.98	1.7	22.5	8.1	0.72	0.08	0.38	0.02
GeheyanR	201210	0.00182	9.12	1.6	20	7.9	0.82	0.05	0.49	0.019
GeheyanR	201211	0.00151	8.13	1.5	21	8	0.89	0.06	0.42	0.023
GeheyanR	201212	0.0014	8.92	1.7	18.5	8	0.78	0.08	0.49	0.017
GeheyanR	201401	0.00221	7.21	1.2	11.6	7.8	0.64	0.05	0.35	0.018
GeheyanR	201402	0.00112	9.73	1.5	11	8	0.61	0.04	0.34	0.002
GeheyanR	201403	0.00121	8.99	1.1	11.5	8	0.56	0.06	0.32	0.009
GeheyanR	201404	0.00211	9.53	1.3	17.4	7.9	0.66	0.05	0.36	0.009
GeheyanR	201405	0.00197	8.65	1.2	18.9	8	0.83	0.04	0.34	0.008
GeheyanR	201406	0.00162	8.74	1.2	17.9	8	0.71	0.06	0.36	0.008
GeheyanR	201407	0.00188	8.34	1.3	24.3	8	0.88	0.06	0.84	0.019
GeheyanR	201408	0.00201	7.67	1.4	28.3	7.9	0.9	0.07	1.23	0.018
GeheyanR	201409	0.00205	7.77	1.5	21.6	8	0.92	0.09	1.85	0.019
GeheyanR	201410	0.00176	8.24	1.1	20.1	8.1	0.72	0.06	1.78	0.015
GeheyanR	201411	0.00187	7.64	1.3	12.1	8.1	0.88	0.06	1.97	0.016
GeheyanR	201412	0.00198	7.36	1.4	10.6	8	0.82	0.07	2.06	0.019
GeheyanR	201501	0.00157	8.12	2.2	13.5	7.2	0.7	0.05	2.17	0.02
GeheyanR	201502	0.0015	8.82	2.5	12.1	8	0.72	0.06	2.04	0.02
GeheyanR	201503	0.00156	9.02	1.9	12.4	8.1	0.74	0.03	1.45	0.013
GeheyanR	201504	0.0016	7.67	2.1	10.5	8.1	0.7	0.04	1.95	0.018
GeheyanR	201505	0.00156	9.67	2.1	21.1	8.1	0.8	0.04	1.39	0.018
GeheyanR	201506	0.00152	9.55	2.1	18.8	8	0.82	0.07	1.66	0.021
GeheyanR	201507	0.00254	9.24	1.7	25.6	8	0.71	0.06	2.08	0.012
GeheyanR	201508	0.00198	8.18	2.2	31.2	8	0.78	0.06	1.54	0.016
GeheyanR	201509	0.00194	8.75	1.78	27	7.3	0.68	0.1	1.67	0.02
GeheyanR	201510	0.00207	8.54	2.1	24.4	7.6	0.72	0.06	2.09	0.02
GeheyanR	201511	0.00328	7.48	2.28	19	7.7	0.68	0.07	1.41	0.021
GeheyanR	201512	0.00212	6.59	2	16.7	8.2	0.76	0.05	1.73	0.019
GeheyanR	201601	0.0026	8	2.17	14.4	7.9	0.74	0.08	2.16	0.019
GeheyanR	201602	0.00256	8.5	2.1	12.2	7.4	0.73	0.04	1.01	0.012
GeheyanR	201603	0.00159	10.8	2.35	14.1	7.7	0.65	0.07	1.27	0.005
GeheyanR	201604	0.00167	9.9	2.1	18.5	7.6	0.72	0.09	1.82	0.005
GeheyanR	201605	0.00164	8.8	2.16	22.5	7.4	0.72	0.09	1.79	0.017
GeheyanR	201606	0.0017	9.5	2	22.1	7.3	0.7	0.09	2.17	0.02
GeheyanR	201607	0.00146	9.12	2.1	23.7	7.5	0.72	0.1	2.82	0.022
GeheyanR	201608	0.00122	8.69	2.1	27.6	8.1	0.64	0.08	1.36	0.018
GeheyanR	201609	0.00206	8.33	1.8	26.4	8	0.96	0.07	1.65	0.005
GeheyanR	201610	0.00522	8.76	1.8	22.4	7.8	0.72	0.07	2.66	0.012
GeheyanR	201611	0.00197	6.59	1.7	21.7	7.8	1.03	0.08	2.25	0.021
HongL	201201	0.00288	8.13333	3.94667	5	7.58667	1.33333	0.2	0.431	0.012
HongL	201202	0.00488	8.46667	4.05333	8	7.52667	1.8	0.196667	0.474	0.00833333
HongL	201203	0.00175	8.13333	4.02667	6	7.48	1	0.206667	0.710333	0.0136667
HongL	201204	0.00209333	7.66667	4.18667	8	7.43667	1	0.216667	0.572	0.0106667
HongL	201205	0.00174	7.66667	4.61333	23	7.61667	1	0.236667	0.808667	0.00833333
HongL	201206	0.00346333	7.86667	3.52	24	7.82333	1.6	0.29	0.641667	0.00766667
HongL	201207	0.00370333	8.2	3.73333	30	7.53	1.33333	0.273333	0.557667	0.00833333
HongL	201208	0.00275333	8	3.76	34	7.25667	1.66667	0.263333	0.565	0.0106667
HongL	201209	0.00263	8.33333	3.81333	25	6.87667	1.4	0.15	0.544333	0.00766667
HongL	201210	0.00524333	7.93333	3.84	19	6.99333	1.8	0.163333	0.658667	0.0143333
HongL	201211	0.00359667	8.73333	3.81333	15	7.42333	2	0.193333	0.703667	0.005
HongL	201212	0.00339333	8.4	3.84	7	7.52	2.13333	0.186667	0.409333	0.0185
HongL	201401	0.00523667	8.86667	3.84	6.8	7.51333	2.06667	0.293333	0.477333	0.0103333
HongL	201402	0.00436667	8.2	3.84	5	7.40333	1.66667	0.22	0.651333	0.0143333
HongL	201403	0.00398667	8.06667	3.81333	9	7.28	1.4	0.303333	0.634667	0.024
HongL	201404	0.00163333	8	3.86667	15	8.10333	1.4	0.3	0.533	0.023
HongL	201405	0.00309333	7.93333	3.92	18	8.5	1.66667	0.266667	1.167	0.0216667
HongL	201406	0.0027	7.66667	3.84	29	8.46	1.26667	0.35	1.01267	0.017
HongL	201407	0.00313667	7.46667	3.92	34	8.56	1.33333	0.15	1.06133	0.015
HongL	201408	0.00200667	8	3.84	28	8.25	1.46667	0.186667	0.753333	0.0243333
HongL	201409	0.00109333	7.86667	3.86667	24	8.09	1.66667	0.343333	0.651	0.0223333
HongL	201410	0.00188667	8.2	3.84	20	8.18667	1.93333	0.306667	0.72	0.018
HongL	201411	0.00466	7.86667	3.78667	17	8.18333	1.73333	0.326667	0.808667	0.02
HongL	201412	0.00402667	8.13333	3.81333	10	8.19	2	0.283333	0.739667	0.013
HongL	201501	0.00341667	8.46667	3.76	13	8.16333	1.8	0.253333	1.82033	0.021
HongL	201502	0.00184667	8.73333	3.81333	9	8.05667	2.2	0.276667	1.31	0.024
HongL	201503	0.00279	8.53333	3.84	11	8.73333	1.6	0.296667	1.68667	0.0233333
HongL	201504	0.00315	7.8	3.86667	15	8.18667	1.13333	0.366667	1.33	0.0203333
HongL	201505	0.00278667	7.6	3.84	20	8.11667	1.2	0.2	0.733333	0.0213333
HongL	201506	0.00319333	7.33333	3.86667	24	8.15667	1.33333	0.207667	0.673333	0.023
HongL	201507	0.00259667	7.66667	3.84	25	7.92	1	0.135667	0.686667	0.0183333
HongL	201508	0.00267	8.13333	3.84	29	8.37667	1.8	0.366667	0.646667	0.018
HongL	201509	0.00144	7.8	3.78667	24	7.78	2.26667	0.286667	0.833333	0.0926667
HongL	201510	0.00367	7.93333	3.84	18	8.17333	2	0.5	1.01	0.0713333
HongL	201511	0.00349	8.66667	3.84	12	8.05	2.33333	0.74	1.60667	0.051
HongL	201512	0.00369	7.33333	3.49333	8	8.15667	1.66667	0.396667	1.04	0.0533333
HongL	201601	0.00343	8	3.44	6	8.2	1.8	0.516667	1.13333	0.027
HongL	201602	0.00159667	7.53333	3.04	4	8.13333	1.46667	0.713333	0.776667	0.01
HongL	201603	0.00236667	8.66667	3.62667	13.3333	8.1	1.73333	0.356667	0.746667	0.0223333
HongL	201604	0.00207	7.73333	2.45333	16	8.1	1.2	0.466667	0.7	0.04
HongL	201605	0.0025	8	3.14667	20	8.16667	1.06667	0.21	0.593333	0.019
HongL	201606	0.00229333	7.93333	3.70667	20	8.86667	1.3	0.263333	0.653333	0.047
HongL	201608	0.00137	7.73333	4.26667	30	8.21	2.13333	0.356667	0.57	0.0286667
HongL	201609	0.00150667	8.46667	4.96	25	7.66	2.46667	0.576667	0.68	0.0356667
HongL	201610	0.00258667	8.86667	6.18667	20	7.97	2.06667	0.61	0.72	0.0786667
HongL	201611	0.00275667	7.8	4.18667	10	8.14667	1.4	0.503333	0.66	0.062
HongL	201612	0.00258667	8.86667	6.18667	20	7.97	2.06667	0.61	0.72	0.0786667
HuanglongtanR	201201	0.00623	8.9	1.275	11	8.04	1.05	0.078	0.93	0.01
HuanglongtanR	201202	0.005795	7.3	1.43	6	7.845	0.97	0.235	1.815	0.01
HuanglongtanR	201203	0.00541	10	1.435	8.8	7.845	0.855	0.0865	1.025	0.01
HuanglongtanR	201204	0.00194	8.35	2.72	10.1	7.9	0.945	0.115	1.13	0.01
HuanglongtanR	201205	0.001135	11.35	1.55	20	8.58	0.865	0.0525	0.96	0.01
HuanglongtanR	201206	0.001365	9.7	1.365	23.5	8	0.985	0.076	0.615	0.01
HuanglongtanR	201207	0.001485	8.6	2.21	26	8.03	0.93	0.063	0.655	0.01
HuanglongtanR	201208	0.002225	7.5	2.525	31	8.01	0.95	0.12	0.82	0.01
HuanglongtanR	201209	0.00301	8.05	3.635	27.5	8.355	1.12	0.035	0.925	0.01
HuanglongtanR	201210	0.002955	7.65	3.005	23	8.11	0.99	0.095	1.45	0.01
HuanglongtanR	201211	0.00286	7.6	2.325	20.5	8.25	0.855	0.105	0.84	0.01
HuanglongtanR	201212	0.002315	7.2	2.235	14	8.195	1.1	0.06	0.875
HuanglongtanR	201401	0.000495	8.15	1.295	13	8.08	0.96	0.31	1.11	0.015
HuanglongtanR	201402	0.000495	8.9	1.47	9	8.135	0.645	0.35	1.05	0.01
HuanglongtanR	201403	0.001625	9.5	1.195	10	8.135	0.795	0.185	0.98	0.0165
HuanglongtanR	201404	0.00377	9.95	1.245	16.5	8.305	0.71	0.195	1.025	0.01
HuanglongtanR	201405	0.00294	9.1	1.015	21	8.265	0.845	0.135	0.875	0.0145
HuanglongtanR	201406	0.00182	10.45	1.135	22.5	8.7	0.88	0.075	0.805	0.0115
HuanglongtanR	201407	0.00104	9.1	1.15	29	8.585	0.975	0.05	0.675	0.011
HuanglongtanR	201408	0.002345	8.5	1.11	30	8.435	1.095	0.045	0.42	0.0115
HuanglongtanR	201409	0.000635	7.6	2.165	31	8.385	2.015	0.05	0.575	0.01
HuanglongtanR	201410	0.00106	7.85	1.145	23	7.89	0.85	0.055	1.105	0.01
HuanglongtanR	201411	0.002255	9.1	1.375	17	7.88	1.355	0.055	1.16	0.011
HuanglongtanR	201412	0.002105	8.3	1.5	10	6.39	0.795	0.15	1.325	0.023
HuanglongtanR	201501	0.00254	9.2	1.485	7	7.735	0.32	0.15	1.23	0.024
HuanglongtanR	201502	0.002465	9.775	1.36	5.3	7.485	1.16	0.175	1.975	0.0135
HuanglongtanR	201503	0.00216	9.05	1.415	11.1	8	1.39	0.105	1.23	0.023
HuanglongtanR	201504	0.00355	10.3	1.97	15.15	8.245	1.88	0.1	1.12	0.022
HuanglongtanR	201505	0.002955	8.7	1.605	22.25	8.23	0.87	0.025	1.35	0.0235
HuanglongtanR	201506	0.003215	8	1.245	24.05	7.94	0.27	0.025	1.11	0.01
HuanglongtanR	201507	0.0022	10.15	2.08	21	8.51	1.99	0.026	0.72	0.02
HuanglongtanR	201508	0.00136	8.2	1.22	31.8	8.57	0.5	0.025	0.665	0.02
HuanglongtanR	201509	0.001645	9.4	1.265	28.3	8.47	0.96	0.0315	0.645	0.01
HuanglongtanR	201510	0.00142	9.65	1.9	20	7.885	1.035	0.033	0.84	0.01
HuanglongtanR	201511	0.001285	6.85	1.42	20.85	8.12	0.5	0.025	0.96	0.02
HuanglongtanR	201512	0.001325	7.15	1.76	16.45	7.93	0.955	0.0265	0.815	0.015
HuanglongtanR	201601	0.001345	8.1	1.14	12.6	8.05	0.54	0.02125	0.775	0.0125
HuanglongtanR	201602	0.001345	11.35	1.235	2	8.1	1.035	0.035	0.875	0.005
HuanglongtanR	201603	0.00952	10.5	1.495	10.8	8	0.875	0.07	0.94	0.0125
HuanglongtanR	201604	0.005635	12.4	1.495	15.3	8.4	1.35	0.05	0.775	0.02
HuanglongtanR	201605	0.005665	9.9	1.09	19	8.7	0.69	0.01925	0.68	0.005
HuanglongtanR	201606	0.00182	7.85	1	21.25	7.85	0.25	0.0125	0.94	0.02
HuanglongtanR	201607	0.005475	8.05	0.987	21.7	8.055	0.6	0.026	0.9795	0.0125
HuanglongtanR	201608	0.00504	9.365	1.7	23.5	8.815	0.768	0.0895	1.115	0.02
HuanglongtanR	201609	0.0006755	8.2	1.22	24.6	7.875	0.25	0.0385	0.9905	0.02
HuanglongtanR	201610	0.0006495	8.29	1.195	23.5	7.575	0.886	0.0125	0.9745	0.02
HuanglongtanR	201611	0.000921	8.85	1.56	11	7.61	0.896	0.01975	1.17	0.02
HuanglongtanR	201612	0.000247	9.875	1.375	15.15	7.98	0.43	0.0975	1.455	0.017
LiangziL	201201	0.00650875	10.9375	2.80125	5.5	7.95875	1.8175	0.21475	0.28	0.013125
LiangziL	201202	0.0061725	11.6375	2.76875	5	7.71875	1.78375	0.2375	0.4105	0.013375
LiangziL	201203	0.00468375	10.7875	2.7375	7	7.935	1.49625	0.14	0.385875	0.018
LiangziL	201204	0.00532875	9.49125	2.63375	16	7.88875	1.6675	0.26975	0.39425	0.0175
LiangziL	201205	0.00477625	7.7125	2.6425	25	8.22625	1.625	0.160625	0.402125	0.015
LiangziL	201206	0.0054875	7.8525	2.76	25	8.08375	1.63	0.17525	0.4275	0.013
LiangziL	201207	0.00878	7.69	2.995	28	8.27125	1.9175	0.148375	0.402375	0.027125
LiangziL	201208	0.00851875	7.33375	3.40125	28.5	8.275	1.56	0.227	0.398	0.02
LiangziL	201209	0.00930375	7.45	3.99125	25.625	7.9925	1.375	0.199625	0.42075	0.019
LiangziL	201210	0.011875	8.3375	3.85625	23.075	8.1075	1.7625	0.147375	0.33125	0.024375
LiangziL	201211	0.0066525	9.375	3.51875	17.7125	8.08625	1.7125	0.216125	0.399125	0.0225
LiangziL	201212	0.00797625	10.05	3.2075	11.225	8.07	2.55	0.228	0.388	0.0162
LiangziL	201401	0.0058025	10.275	3.0375	7.4875	7.76875	1.9125	0.29225	0.45125	0.0225
LiangziL	201402	0.00525625	10.775	3.2125	4.9125	7.845	1.4375	0.25875	0.431125	0.016375
LiangziL	201403	0.00503625	10.375	3.2	12.0625	7.70625	1.525	0.254	0.41325	0.0185
LiangziL	201404	0.005258	8.6	2.7	19.0625	7.97125	1.75	0.166375	0.3995	0.017375
LiangziL	201405	0.0053475	8.3125	2.825	21.4875	7.86375	1.4875	0.207125	0.409375	0.0205
LiangziL	201406	0.005445	7.375	2.85	26.3375	7.99125	1.3	0.148	0.393875	0.0195
LiangziL	201407	0.00691125	7.05625	3	27.025	7.965	0.8875	0.1705	0.39675	0.0225
LiangziL	201408	0.00553375	6.725	2.975	30.5625	7.95375	1.1125	0.1695	0.433125	0.016
LiangziL	201409	0.0089775	6.8375	3.1125	25.9	7.94375	1.275	0.2495	0.431625	0.019375
LiangziL	201410	0.00850125	7.175	3.0375	24.15	7.9625	1.2	0.264875	0.453625	0.021625
LiangziL	201411	0.00728375	8.225	2.975	16.95	7.9175	1.25	0.185625	0.4585	0.019625
LiangziL	201412	0.007425	9.5625	3.0375	10.0375	7.80375	1.6375	0.239875	0.44325	0.0225
LiangziL	201501	0.0091625	10.4125	3.2375	9.95	7.89125	1.5875	0.292375	0.45125	0.022875
LiangziL	201502	0.0084775	9.975	3.125	5.4375	7.9125	1.675	0.2465	0.45575	0.023125
LiangziL	201503	0.00884375	9.4875	3.3	10.6375	7.73625	1.5125	0.2555	0.466875	0.022875
LiangziL	201504	0.0066325	9.2125	3.2875	19.4875	7.78125	1.275	0.227875	0.447625	0.02425
LiangziL	201505	0.00620625	7.975	3.2625	22.825	7.9225	0.9875	0.241625	0.421375	0.019
LiangziL	201506	0.0076075	7.675	3.2625	24.5375	7.865	1.4	0.2795	0.43575	0.02175
LiangziL	201507	0.0092275	6.6625	3.3125	28.5125	7.985	1.5625	0.219	0.444875	0.021625
LiangziL	201508	0.0099575	6.5375	3.35	33.725	7.97125	1.3	0.191875	0.4485	0.0205
LiangziL	201509	0.014925	7.2	4.425	28.5125	8.13	1.525	0.20875	0.699125	0.02675
LiangziL	201510	0.0073475	6.95	3.375	22.7875	8.08125	1.15	0.2305	0.465625	0.03175
LiangziL	201511	0.00778625	7.35	3.5875	15.2875	7.72875	1.3	0.314	0.4575	0.0365
LiangziL	201512	0.0075475	8.95	3.55	10.1875	8.0125	1.275	0.12475	0.45575	0.031
LiangziL	201601	0.00756625	10.05	3.2875	9.225	7.8375	1.475	0.13475	0.426875	0.024
LiangziL	201602	0.0077275	10.4125	3.6875	5.35	7.8	1.25	0.154375	0.4525	0.022625
LiangziL	201603	0.00737375	9.1	3.175	14.7	7.7375	1.6375	0.174375	0.464875	0.02775
LiangziL	201604	0.0078375	8.2	3.1625	17.7125	7.925	1.25	0.191125	0.421375	0.030625
LiangziL	201605	0.00675	7.6	2.975	21.5625	7.6125	0.975	0.130625	0.45975	0.016625
LiangziL	201606	0.0070375	7.575	3.0625	22.3	7.8	1.6125	0.06075	0.375875	0.021
LiangziL	201608	0.0095375	6.2875	3.8125	34.0625	8.1875	1.3875	0.093125	0.441375	0.024375
LiangziL	201609	0.0087375	6.825	3.5125	26.0125	8.19125	1.675	0.13875	0.452375	0.024625
LiangziL	201610	0.0129125	7.3	3.4625	21.6375	7.79	1.5875	0.102625	0.4625	0.024125
LiangziL	201611	0.010925	8.575	3.5125	12.8125	8.09875	1.6375	0.15	0.456625	0.028
LiangziL	201612	0.0105	10.0125	3.6	11.8375	7.8775	1.8	0.32825	0.469125	0.02125
LongganL	201201	0.00424	8.2	2.44	6	7.6	2	0.173	0.52	0.099
LongganL	201202	0.00224	9.9	4	7.5	6.8		0.191	0.86	0.103
LongganL	201203	0.0026	8	3.5	9	7.5	2	0.386	0.56	0.107
LongganL	201204	0.00295	8	2.3	15.7	7.93	2	0.488	1.27	0.086
LongganL	201205	0.00236	7	5.78	17.2	8.05	2.3	0.482	0.98	0.059
LongganL	201206	0.00177	6	2.04	25.4	7.58	1	0.169	0.976	0.049
LongganL	201207	0.00534	7	3.21	22.9	8.04	1	0.119	0.93	0.035
LongganL	201208	0.00358	7.34	2.47	28	7.89	2	0.093	0.706	0.034
LongganL	201209	0.00314	6.87	2.78	23.9	7.02	2.1	0.204	0.51	0.045
LongganL	201210	0.00293	8.35	3.91	21.5	6.59	2.3	0.106	0.794	0.047
LongganL	201211	0.00236	8.39	2.4	14.5	7.13	2.3	0.097	0.541	0.021
LongganL	201212	0.00077	9.56	2.02	11.5	7.12		0.053	0.765	0.039
LongganL	201401	0.00053	8.4	6	6.8	6.81	3.4	0.78	0.95	0.03
LongganL	201402	0.00053	8.3	5.3	5.7	6.8	3.3	0.77	0.94	0.03
LongganL	201403	0.00055	7.8	5.2	7.3	6.82	3.4	0.76	0.93	0.028
LongganL	201404	0.00041	7.8	5	18	6.8	3	0.7	0.9	0.026
LongganL	201405	0.0004	7.6	4.9	19	6.82	2.9	0.68	0.88	0.026
LongganL	201406	0.0005	7.48	5	25.4	7.81	3	0.12	0.51	0.023
LongganL	201407	0.00678	7.53	5.1	23.5	7.8	2.9	0.1	0.5	0.024
LongganL	201408	0.00676	7.43	5.7	26.1	7.82	3.1	0.12	0.49	0.038
LongganL	201409	0.0067	7.83	5.8	20.1	7.8	3	0.15	0.48	0.035
LongganL	201410	0.006	7.82	5.7	20.3	7.84	3.1	0.17	0.47	0.037
LongganL	201411	0.0059	7.94	5.4	18.2	7.84	3	0.14	0.43	0.034
LongganL	201412	0.0053	8.24	5.3	10.5	7.84	2.9	0.13	0.41	0.036
LongganL	201501	0.0165	11.66	2.72	7.4	7.7	2.89	0.456	0.657	0.047
LongganL	201502	0.00072	12.35	4.25	3.7	8.19	2.51	0.383	0.89	0.05
LongganL	201503	0.00591	14.43	1.71	8.5	7.94	3.64	0.283	1.52	0.076
LongganL	201504	0.00427	8.91	5.23	12	7.61	2.35	0.623	0.822	0.035
LongganL	201505	0.0155	11.73	5.99	25.6	8.02	2.04	0.325	0.638	0.081
LongganL	201506	0.0324	11.47	5.24	28.6	7.56	1.29	0.33	0.689	0.09
LongganL	201507	0.0433	13.12	3.98	34.3	8.05	1.23	0.147	0.849	0.098
LongganL	201508	0.00233	6.57	4.78	28.6	7.62	3.17	0.247	1.12	0.091
LongganL	201509	0.00919	6.69	5.73	28.9	7.61	1.5	0.287	0.457	0.077
LongganL	201510	0.0132	9.2	6.12	21.8	7.75	1.05	0.188	0.678	0.046
LongganL	201511	0.00715	9.54	6.36	14.8	7.93	1.84	0.196	0.889	0.054
LongganL	201512	0.0108	10.36	5.66	11.8	7.23	0.25	0.512	0.656	0.031
LongganL	201601	0.00952	12.7	4.97	13.1	7.4	2.27	0.256	0.969	0.085
LongganL	201602	0.00868	13.4	4.76	2.7	8	2.15	0.119	1.18	0.063
LongganL	201603	0.0258	10.9	6.29	11.3	7.9	3.05	0.134	0.776	0.076
LongganL	201604	0.00801	11.8	4.72	18.4	7.5	7.2	0.235	0.49	0.099
LongganL	201605	0.0309	11.3	5.79	25.1	8.2	5.54	0.213	0.776	0.031
LongganL	201606	0.0303	10.2	4.49	24.5	8.5	2.14	0.353	0.592	0.049
LongganL	201607	0.00916	6.97	2.8	31.3	8.21	1.43	0.258	0.78	0.04
LongganL	201608	0.00998	8.56	5.5	33.7	8.4	1.5	0.186	0.55	0.04
LongganL	201609	0.0125	9.05	5.1	29.4	7.38	3	0.204	1.01	0.05
LongganL	201610	0.0105	8.57	4.8	23.4	7.58	2.45	0.077	0.98	0.03
LongganL	201611	0.00941	11.14	5.5	17.3	7.62	1.6	0.494	1.19	0.07
LongganL	201612	0.0105	14.41	5.6	12	8.17	1.4	0.579	1.44	0.1
LuguL	201201	0.006	7.3	1	9.5	8.22	1	0.01	0.1	0.005
LuguL	201202	0.005	7.4	1	6	8.26	1	0.01	0.1	0.005
LuguL	201203	0.007	7.5	0.7	9.5	8.14	1	0.02	0.11	0.005
LuguL	201204	0.003	8.1	0.7	11	8.3	1	0.01	0.1	0.005
LuguL	201205	0.001	7.9	1.1	12	8.36	1	0.01	0.1	0.005
LuguL	201206	0.002	7.1	1.25	18	8.14	1	0.01	0.24	0.005
LuguL	201207	0.002	7.1	1.1	22	8.31	1	0.01	0.2	0.005
LuguL	201208	0.001	6.9	1	18	8.25	1	0.01	0.18	0.005
LuguL	201209	0.004	6.9	1.2	17.5	8.21	1	0.02	0.29	0.005
LuguL	201210	0.008064	8.1	12.1	17.5	8.8	6	0.292	3.59	0.079
LuguL	201211	0.003	6.9	0.7	13.5	8.18	1	0.01	0.11	0.005
LuguL	201212	0.0014481	7.9	15.79	14	8.55	6	0.111	5.38	0.038
LuguL	201401	0.003	7.3	1.1	11	8.66	1	0.0125	0.15	0.005
LuguL	201402	0.003	6.9	0.8	11	8.27	1	0.0125	0.15	0.005
LuguL	201403	0.002	7.8	0.9	11	8.55	1	0.0125	0.12	0.005
LuguL	201404	0.002	7.8	1	14	8.5	1	0.0125	0.14	0.005
LuguL	201405	0.004	7.8	0.9	15	8.28	1	0.0125	0.12	0.005
LuguL	201406	0.001	7.9	0.8	18	8.57	1	0.0125	0.12	0.005
LuguL	201407	0.002	6.8	1.4	17.5	8.52	1	0.0125	0.13	0.005
LuguL	201408	0.002	6.9	1.8	20	8.55	1	0.0125	0.12	0.005
LuguL	201409	0.002	6.9	1.8	17	8.48	1	0.0125	0.13	0.005
LuguL	201410	0.001	7.5	1.1	19	8.69	1	0.0125	0.16	0.005
LuguL	201411	0.001	7.1	0.8	16	8.5	1	0.0125	0.07	0.005
LuguL	201412	0.001	7.3	0.9	10	8.54	1	0.0125	0.12	0.005
LuguL	201501	0.002	7.2	0.9	11	8.29	0.25	0.0125	0.13	0.005
LuguL	201502	0.002	7.8	0.6	10	8.43	0.25	0.0125	0.09	0.005
LuguL	201503	0.004	7.4	0.6	10	8.03	0.25	0.0125	0.09	0.005
LuguL	201504	0.003	7.4	0.6	12	8.31	0.7	0.0125	0.11	0.005
LuguL	201505	0.0005	8.1	0.25	15	8.43	0.7	0.04	0.12	0.005
LuguL	201506	0.001	7.6	0.25	17	8.38	0.6	0.0125	0.09	0.005
LuguL	201507	0.001	7.2	0.25	13.5	8.3	0.25	0.05	0.09	0.005
LuguL	201508	0.0011	6.9	0.25	17	8.07	0.25	0.0125	0.1	0.005
LuguL	201509	0.001	6.9	0.6	19	8.37	0.25	0.0125	0.11	0.005
LuguL	201510	0.002	7	1.5	19	8.26	0.25	0.0125	0.12	0.005
LuguL	201511	0.001	7.3	0.9	17	8.65	0.25	0.0125	0.11	0.005
LuguL	201512	0.001	7.4	0.25	14	8.32	1	0.0125	0.12	0.005
LuguL	201601	0.001	6.6	0.25	10.5	8.4	0.25	0.0125	0.09	0.005
LuguL	201602	0.001	6.4	0.8	10.9	8.4	0.7	0.0125	0.1	0.005
LuguL	201603	0.002	7.6	0.8	9.2	8.3	0.8	0.0125	0.12	0.005
LuguL	201604	0.002	8	1	11.6	8.4	0.9	0.0125	0.114	0.005
LuguL	201605	0.001	7.4	1	15.5	8.5	0.8	0.04	0.12	0.005
LuguL	201606	0.002	7.4	1	16.5	8.3	0.25	0.0125	0.12	0.005
LuguL	201607	0.001	7	1.1	18.5	8.41	0.6	0.0125	0.12	0.005
LuguL	201608	0.001	7.1	1.3	23.5	8.55	0.8	0.0125	0.12	0.005
LuguL	201609	0.002	7.1	1.4	22.7	8.46	0.9	0.0125	0.12	0.005
LuguL	201610	0.002	7.1	1.2	19.5	8.42	1	0.0125	0.1	0.005
LuguL	201611	0.001	7.1	1.1	18.5	8.41	0.8	0.0125	0.1	0.005
LuguL	201612	0.002	7.1	1.6	14.6	8.47	0.6	0.026	0.11	0.005
NanyiL	201201	0.00746	11.85	3.8	6.25	7.76	3.05	0.6845	1.305	0.035
NanyiL	201202	0.00187	11.35	4.3	6	7.72	3.3	0.811	1.35	0.041
NanyiL	201203	0.00877	9.75	2.75	8.25	7.625	2.2	0.808	3.21	0.04
NanyiL	201204	0.008025	9.7	2.8	13.5	7.505	2.15	0.304	2.12	0.045
NanyiL	201205	0.00874	8.2	3.6	22.1	7.665	2.05	0.3225	1.105	0.028
NanyiL	201206	0.008345	8.55	4.1	23.25	6.975	2.15	0.3935	1.205	0.0445
NanyiL	201207	0.00634	7	3.6	27.25	7.59	2.95	0.493	1.725	0.042
NanyiL	201208	0.004815	6.15	3.85	29	7.55	1.95	0.4545	0.775	0.035
NanyiL	201209	0.007985	6.55	2.85	26	7.225	1	0.179	0.945	0.0285
NanyiL	201210	0.00727	7.95	3	21.8	7.565	1.8	0.1715	0.915	0.0415
NanyiL	201211	0.0032	8.25	3.15	18.9	7.035	2.4	0.231	1.11	0.0415
NanyiL	201212	0.007705	10.45	4.705	10.4	7.025	3.1	0.2125	1.365	0.04
NanyiL	201401	0.00805	12.85	3.35	4.75	7.4	3.55	0.223	1.125	0.06
NanyiL	201402	0.004315	12.55	3.25	4.5	7.2	3.45	0.191	1.78	0.07
NanyiL	201403	0.003155	10.55	3.5	8.25	7.45	3.1	0.5	2.335	0.0335
NanyiL	201404	0.00442	8.05	3.9	18	7.1	3.45	0.3415	2.385	0.04
NanyiL	201405	0.00872	8.5	2.4	20	7.4	2.35	0.2445	1.61	0.035
NanyiL	201406	0.001935	8.4	3.1	23.75	7.5	1.85	0.2195	1.56	0.04
NanyiL	201407	0.00785	7.6	3.1	24.4	7.5	3.4	0.21	2.025	0.035
NanyiL	201408	0.003485	8.3	4.5	32.75	7.5	1.9	0.1605	1.265	0.04
NanyiL	201409	0.00705	7.05	3.5	26.1	7.5	2.7	0.162	1.16	0.035
NanyiL	201410	0.004435	8.25	1.6	22	7.5	1.9	0.244	0.625	0.035
NanyiL	201411	0.00363	9.05	2.2	16.65	7.45	1.7	0.4185	1.87	0.04
NanyiL	201412	0.00544	11.8	3.2	8.75	7.5	2.95	0.274	1.975	0.035
NanyiL	201501	0.01255	14.25	3.4	5.9	7.65	2.15	0.36	1.7	0.0425
NanyiL	201502	0.00787	8.7	3.45	4.75	7.5	2.95	0.3225	2.85	0.041
NanyiL	201503	0.007	10.45	4.25	9.1	6.6	1.25	0.223	1.54	0.042
NanyiL	201504	0.003435	10.1	3.05	9.1	8.75	2.75	0.252	2.82	0.045
NanyiL	201505	0.005865	8.55	4.2	21.05	7.6	1.75	0.28	2.735	0.038
NanyiL	201506	0.00618	7.9	4.25	29.25	7.85	2.2	0.159	3.625	0.039
NanyiL	201507	0.005405	7.75	3.75	23	7.8	2.45	0.205	1.46	0.039
NanyiL	201508	0.002635	6.35	3.05	28.85	7.85	1.15	0.138	1.365	0.025
NanyiL	201509	0.00293	7.7	3.05	28.75	8.35	2.9	0.142	2.875	0.0455
NanyiL	201510	0.00404	10	3.4	25.15	7.7	2.15	0.158	1.26	0.044
NanyiL	201511	0.00437	11.2	2.45	14.75	7.65	2.15	0.483	3.22	0.0625
NanyiL	201512	0.00338	12.7	3.1	10	7.45	3.95	0.731	2.18	0.079
NanyiL	201601	0.004305	10.2	3.05	8.15	7.35	3.2	0.402	2.685	0.095
NanyiL	201602	0.00874	13.3	0.6	2	7.4	2.7	0.6265	2.295	0.14
NanyiL	201603	0.011155	10.5	0.95	13.75	8.05	3.5	0.4285	3.475	0.04
NanyiL	201604	0.0195	7	4.65	15.45	7.25	3.1	0.2255	1.07	0.025
NanyiL	201605	0.00081	6.35	1	19.65	7.25	1.35	0.2825	4.19	0.025
NanyiL	201606	0.0035	8.2	4.15	24.4	7.35	2.55	0.2905	3.395	0.025
NanyiL	201607	0.00136	9.55	3.1	23.25	7.095	1.35	0.5315	2.785	0.01
NanyiL	201608	0.0012295	6.4	3.3	32.25	6.895	2.25	0.1475	1.745	0.02
NanyiL	201609	0.011315	8.95	5.2	26.25	8.265	3.8	0.2135	2.165	0.035
NanyiL	201610	0.002625	7.6	4.5	20.75	7.65	1.05	0.2335	5.945	0.03
NanyiL	201611	0.006985	7.95	3.1	14.6	7.645	1.05	0.2035	4.745	0.045
NanyiL	201612	0.005245	7.2	3.3	9	6.97	2.25	0.382	4.455	0.03
ShengjinL	201207	0.00186	7.65	3.65	24	7.58		0.398	0.904	0.059
ShengjinL	201208	0.00192	7.61	3.84	20.9	7.9		0.428	0.79	0.051
ShengjinL	201209	0.00189	7.13	3.6	21.7	7.86		0.446	0.865	0.063
ShengjinL	201210	0.00192	6.17	3.68	23	7.66		0.452	0.795	0.067
ShengjinL	201211	0.00197	10.93	3.66	17.4	7.91		0.469	0.795	0.066
ShengjinL	201212	0.00184	10.32	3.61	8.2	8.1		0.478	0.789	0.067
ShengjinL	201401	0.00162	9.03	3.53	5.5	7.52		0.033	0.483	0.046
ShengjinL	201402	0.0016	8.09	3.52	3	7.81		0.045	0.483	0.038
ShengjinL	201403	0.00159	6.27	3.07	10.3	7.91		0.045	0.129	0.05
ShengjinL	201404	0.00157	7.26	3.15	19.7	7.88		0.087	0.276	0.044
ShengjinL	201405	0.00161	6.85	3.2	19.7	7.99		0.105	0.207	0.044
ShengjinL	201406	0.00159	8.92	3	24.4	7.91		0.114	0.242	0.04
ShengjinL	201407	0.00166	6.39	2.9	23.9	7.96		0.117	0.236	0.046
ShengjinL	201408	0.00172	7.54	3.1	23.4	8.16		0.135	0.235	0.043
ShengjinL	201409	0.00168	8.01	2.8	26.3	7.88		0.135	0.217	0.04
ShengjinL	201410	0.00156	6.42	2.6	24.2	7.86		0.15	0.218	0.042
ShengjinL	201411	0.00166	6.59	3	16.3	7.98		0.18	0.237	0.049
ShengjinL	201412	0.00174	9.08	2.9	13.9	7.94		0.2	0.233	0.061
ShengjinL	201501	0.00165	12.26	3.2	12.5	8.56		0.189	0.235	0.047
ShengjinL	201502	0.00165	10.11	2.9	4.7	8.36		0.231	0.506	0.04
ShengjinL	201503	0.00169	9.49	2.9	11.2	7.93		0.241	0.269	0.036
ShengjinL	201504	0.00167	8.62	2.8	17.5	8.24		0.247	0.385	0.04
ShengjinL	201505	0.0009	7.59	2.9	26.5	8.36		0.26	0.87	0.028
ShengjinL	201506	0.0027	8.39	3.2	20.1	7.05		0.201	0.88	0.042
ShengjinL	201507	0.0015	9.37	2.8	28.9	7.39		0.247	1.55	0.04
ShengjinL	201508	0.0016	8.32	3.3	32.5	7.55		0.211	0.954	0.037
ShengjinL	201509	0.0018	8.11	2.8	27	7.89		0.366	0.991	0.029
ShengjinL	201510	0.0016	7.21	3	17	8.03		0.437	0.963	0.045
ShengjinL	201511	0.0024	6.97	2.5	18.3	7.73		0.338	0.963	0.049
ShengjinL	201512	0.0024	8.34	2.8	9	8.02		0.095	0.982	0.037
ShengjinL	201601	0.0016	8	1.8	5	7.9		0.101	0.96	0.032
ShengjinL	201602	0.0005	6.5	1.5	8	7		0.11	0.95	0.048
ShengjinL	201603	0.00169	7	1.3	10.2	7		0.094	0.992	0.057
ShengjinL	201604	0.0005	6.6	2.8	11.9	6.5		0.104	0.973	0.048
ShengjinL	201605	0.0005	6.7	3.2	17.3	7.2		0.104	0.915	0.044
ShengjinL	201606	0.00167	6.7	1.7	15.4	7.2		0.217	0.963	0.024
ShengjinL	201607	0.0021	6.77	1.4	19.7	7.64		0.134	0.923	0.046
ShengjinL	201608	0.00179	6.77	1.2	26.2	7.19		0.206	0.999	0.028
ShengjinL	201609	0.00178	6.2	2.1	23.1	7.14		0.095	0.99	0.036
ShengjinL	201610	0.00175	6.79	2.21	19.5	7.09		0.131	0.99	0.04
ShengjinL	201611	0.00205	6.8	1.8	17	7.72		0.228	0.954	0.044
ShengjinL	201612	0.00216	6.54	3.7	14.5	6.92		0.118	0.952	0.04
TaipingL	201201	0.00329	12.3	2.02	8	8.07		0.065	0.566	0.027
TaipingL	201202	0.00134	10.7	1.9	8.7	7.78	2.1	0.073	0.48	0.02
TaipingL	201203	0.00236	11.2	1.9	8.3	8.1	1.7	0.048	0.37	0.02
TaipingL	201204	0.00282	9.4	1.7	14.5	7.42	1.3	0.031	0.55	0.02
TaipingL	201205	0.0049	9.9	1.6	20.5	7.18	1.8	0.031	0.81
TaipingL	201206	0.00537	9.3	1.6	24.4	8.85	1.5	0.029	0.82	0.01
TaipingL	201207	0.00208	9.5	1.7	30	8.38	0.9		1.39	0.01
TaipingL	201208	0.00077	10.3	1.9	29.5	8.55	0.5	0.04	1.27
TaipingL	201209	0.015	9.5	1.8	28.4	8.61			0.64	0.011
TaipingL	201210	0.00608	9.6	2.2	25.7	8.17			0.74	0.01
TaipingL	201211	0.0046	8.2	2.2	21.2	7.6		0.037	0.27	0.01
TaipingL	201212	0.00274	9.3	1.4	10.2	7.71	0.6		0.58	0.01
TaipingL	201401	0.00468	10.9	1.5	8.1	7.77	0.25	0.076	0.41	0.01
TaipingL	201402	0.00529	11	1.3	9.4	7.69	0.25	0.043	0.3	0.005
TaipingL	201403	0.002	10.5	1.9	12.8	7.63	0.25	0.089	0.57	0.005
TaipingL	201404	0.00148	9.5	2	16.7	7.9	0.25	0.144	0.95	0.005
TaipingL	201405	0.00595	8.9	1.8	20.3	8.52	0.25	0.226	1.01	0.01
TaipingL	201406	0.0097	8.4	1.8	23	8.67	0.25	0.089	0.86	0.01
TaipingL	201407	0.00646	8.1	1.9	25.5	8.64	0.6	0.076	1	0.005
TaipingL	201408	0.00689	7.1	1.8	30	8.82	0.5	0.108	0.98	0.005
TaipingL	201409	0.0109	8.9	1.8	28.6	8.6	0.25	0.086	0.71	0.005
TaipingL	201410	0.0167	9.5	1.7	23.4	8.59	0.5	0.087	0.69	0.02
TaipingL	201411	0.00136	10.2	1.5	18.5	8.83	0.25	0.01	0.62	0.005
TaipingL	201412	0.00176	11.9	2	17.7	8.03	0.25	0.073	0.65	0.005
TaipingL	201501	0.00375	12	1.6	9	7.63	0.25	0.043	0.46	0.005
TaipingL	201502	0.00137	11.6	2.7	6.3	7.41	0.25	0.032	0.77	0.005
TaipingL	201503	0.00137	12.5	1.4	13.3	7.49	0.25	0.147	0.85	0.005
TaipingL	201504	0.0038	10.1	1.3	16	7.37	1.2	0.354	0.98	0.005
TaipingL	201505	0.00967	11.7	1.6	19.3	7.93	1.3	0.176	0.88	0.01
TaipingL	201506	0.00877	9.8	1.6	27	7.81	1	0.119	0.84	0.005
TaipingL	201507	0.0134	9	1.6	27.7	7.21	1.7	0.094	0.64	0.005
TaipingL	201508	0.0086	8.8	2.2	31.4	7.84	1	0.092	0.54	0.012
TaipingL	201509	0.0086	9.3	1.3	29.9	7.36	0.25	0.153	0.85	0.01
TaipingL	201510	0.0051	9.3	1.6	20.5	8.13	0.25	0.113	0.54	0.005
TaipingL	201511	0.0051	10.9	2.2	19.1	8.13	0.25	0.207	0.83	0.005
TaipingL	201512	0.00176	9.8	1.4	11.5	8.07	0.25	0.162	0.64	0.005
TaipingL	201601	0.00189	9.8	0.8	14.2	7.7	0.5	0.098	0.98	0.005
TaipingL	201602	0.00332	11.8	0.9	4.7	7.9	0.5	0.318	0.97	0.005
TaipingL	201603	0.00663	12.9	0.7	12.5	8.3	0.25	0.044	0.93	0.005
TaipingL	201604	0.00392	10.9	0.8	16.3	7.9	0.7	0.086	0.98	0.005
TaipingL	201605	0.0177	9.4	1.9	23.7	8.8	3.2	0.104	2	0.005
TaipingL	201606	0.00414	9.2	1.2	25.8	8.3	0.25	0.042	1.55	0.03
TaipingL	201607	0.00839	9.4	1.2	26.1	7.99	0.25	0.048	1.16	0.012
TaipingL	201608	0.00213	8.7	1.6	34.2	8.86	1.2	0.057	0.76	0.015
TaipingL	201609	0.00367	8.9	1.7	30	8.6	1	0.03	0.58	0.011
TaipingL	201610	0.00552	8.9	1.4	23.9	7.88	1	0.058	0.69	0.005
TaipingL	201611	0.00483	6.9	1.3	19.8	7.73	0.9	0.07	0.69	0.019
TaipingL	201612	0.00202	8.4	1.3	15.6	7.82	1.4	0.048	1.05	0.005
WuchangL	201201	0.00425	8.2	2.96	6	7.84	2	0.201	1.02	0.079
WuchangL	201202	0.0037	10	3.36	7.5	7.12		0.222	0.72	0.054
WuchangL	201203	0.00188	8.1	2.78	9	7.6		0.158	0.75	0.106
WuchangL	201204	0.00135	8.1	2.42	16	7.87		0.252	0.6	0.061
WuchangL	201205	0.00117	7.2	2.77	17.5	8.13	2	0.342	0.86	0.051
WuchangL	201206	0.0026	6.1	3.34	26	7.55	1	0.105	0.715	0.04
WuchangL	201207	0.00454	7.2	3.76	23	7.66	1	0.129	0.873	0.046
WuchangL	201208	0.00431	8.02	5.5	28.1	8.1	4	0.115	0.922	0.047
WuchangL	201209	0.00306	6.02	4.97	24.1	6.82	1	0.135	0.353	0.042
WuchangL	201210	0.00236	8.06	4.37	22.8	7.19	2.3	0.166	0.882	0.041
WuchangL	201211	0.0012	8.27	4.03	14.5	7.1	2.2	0.262	0.663	0.044
WuchangL	201212	0.00117	8.1	2.33	9	7.21		0.106	0.709	0.045
WuchangL	201401	0.00171	9.32	3.3	6.9	7.81	2	0.232	0.547	0.045
WuchangL	201402	0.00242	12.65	2.4	4.5	7.25	1	0.248	0.72	0.042
WuchangL	201403	0.00167	9.3	2.27	11.2	7.66	1	0.412	1.04	0.047
WuchangL	201404	0.0021	9.6	2.64	16.7	7.5	2.1	0.045	0.75	0.035
WuchangL	201405	0.00366	8.7	2.35	20.9	7.5	1	0.085	0.384	0.029
WuchangL	201406	0.00286	7.2	2.42	26.6	7.5	1	0.106	0.616	0.021
WuchangL	201407	0.0021	10.5	3.24	27.5	7.6	2.9	0.314	0.46	0.037
WuchangL	201408	0.00231	8.6	3.37	32.1	7.8	2.6	0.069	0.88	0.055
WuchangL	201409	0.00181	7.5	3.2	24.5	7.8	3	0.074	0.56	0.042
WuchangL	201410	0.0018	6.5	4.54	24.9	7.5	2.5	0.131	1.11	0.053
WuchangL	201411	0.00234	6.32	4.21	20.3	7.43	2.3	0.07	0.85	0.038
WuchangL	201412	0.00215	6	4.66	12.8	7.21	2.3	0.962	1.46	0.04
WuchangL	201501	0.00193	11.8	2.66	9.3	7.18	3	0.195	0.9	0.028
WuchangL	201502	0.00211	10.6	3.4	4.1	7.56	2.8	0.258	0.72	0.075
WuchangL	201503	0.00167	9.21	2.01	12	8.1	2.5	0.118	1.16	0.03
WuchangL	201504	0.0017	6.78	3.12	12	7.22	2.81	0.456	0.88	0.11
WuchangL	201505	0.00236	5.7	4.36	16	7.07	1.75	0.399	1.22	0.005
WuchangL	201506	0.00266	5.71	2.82	25.4	6.97	0.49	0.122	0.226	0.041
WuchangL	201507	0.00263	7.57	3.2	26.3	6.96	2.98	0.538	0.74	0.115
WuchangL	201508	0.0021	5.98	3.87	30	8.41	2.2	0.283	1.31	0.042
WuchangL	201509	0.00293	5.96	2.43	27.1	7.75	2.05	0.312	0.572	0.052
WuchangL	201510	0.00519	8.99	2.66	26.3	7.37	2.11	0.175	1.58	0.023
WuchangL	201511	0.00185	7.55	2.35	10.2	7.73	2.06	0.25	0.535	0.023
WuchangL	201512	0.00636	5.39	3.37	11.5	7.59	2.88	0.124	1.39	0.035
WuchangL	201601	0.0045	7	2.35	10.9	6.7	1	0.081	0.563	0.017
WuchangL	201602	0.00126	5.9	1.33	4.1	6.2	1	0.277	0.441	0.03
WuchangL	201603	0.003	5.6	1.49	13.5	6.5	1	0.244	0.544	0.023
WuchangL	201604	0.00173	7.5	1.41	9.6	7	1	0.387	0.469	0.093
WuchangL	201605	0.00153	5.1	2.04	16.3	6.1	1	0.316	0.97	0.048
WuchangL	201606	0.00521	5.5	2.46	16.5	6.7	1	0.174	0.93	0.023
WuchangL	201607	0.00176	5.82	3.49	16.5	6.44	1	0.772	0.921	0.05
WuchangL	201608	0.011	5.39	3.65	21.4	7.45	2.32	0.413	0.398	0.0187
WuchangL	201609	0.008	5.38	2.1	23	8.26	1	0.385	0.646	0.0301
WuchangL	201610	0.0147	6.64	1.72	15.7	7.98	1	0.795	2.64	0.0259
WuchangL	201611	0.0027	5.3	2.47	14.1	8.3	1	0.39	2.26	0.0411
WuchangL	201612	0.00365	5.73	1.61	12.5	8.12	1	0.33	0.857	0.037
YangchengL	201201	0.0137	11.2	3.8	5.2	7.86	2.8	0.02	1.03	0.05
YangchengL	201202	0.0049	11.5	3.2	5.9	8.15	2.9	0.07	1.06	0.06
YangchengL	201203	0.0031	10.2	3	7.3	8.15	4	0.06	2.54	0.06
YangchengL	201204	0.0106	11.9	3.7	16.1	8.87	1.8	0.02	1.21	0.06
YangchengL	201205	0.0028	10.4	4.6	25	8.68	4	0.11	0.85	0.06
YangchengL	201206	0.0126	7.5	4.4	23	8.35	4.1	0.06	0.96	0.08
YangchengL	201207	0.0094	3.7	4.5	29.7	7.68	2.4	0.21	0.74	0.07
YangchengL	201208	0.0124	7	4.6	27.2	8.13	2	0.19	1.09	0.1
YangchengL	201209	0.0128	5.4	4	26.2	8.12	3.8	0.25	1.53	0.07
YangchengL	201210	0.0222	7.3	5	20.8	8	2	0.08	1.01	0.08
YangchengL	201211	0.0149	10.5	4.7	14.1	8.39	3.1	0.06	0.87	0.04
YangchengL	201212	0.0182	10.6	4.2	9.9	8.45	2.3	0.24	1.8	0.09
YangchengL	201401	0.0198	9.9	3.6	7	8.19	2.3	0.03	1.64	0.04
YangchengL	201402	0.0183	11.2	3.8	6.9	8.2	2.4	0.09	1.13	0.06
YangchengL	201403	0.0208	10.8	3.6	8.6	7.98	1.5	0.24	2.18	0.12
YangchengL	201404	0.0279	9.8	4	16	8.19	3	0.04	2.23	0.08
YangchengL	201405	0.0257	10.9	4.2	18.7	8.47	2.2	0.04	1.81	0.06
YangchengL	201406	0.0288	7.4	4.3	22.4	7.73	1.3	0.17	1.31	0.06
YangchengL	201407	0.032	7.9	4.5	25.1	8.16	1.6	0.05	0.92	0.05
YangchengL	201408	0.0355	9.3	4.3	30.5	8.43	2.5	0.08	0.8	0.02
YangchengL	201409	0.0219	5.8	3.8	26.1	7.64	1.1	0.17	1.18	0.03
YangchengL	201410	0.0202	10.1	4.2	21.3	7.76	2.1	0.03	0.87	0.07
YangchengL	201411	0.0138	8.5	4.3	17.4	7.68	1.6	0.3	1.23	0.04
YangchengL	201412	0.0148	9.5	4	13.2	7.98	1.6	0.17	1.38	0.08
YangchengL	201501	0.0228	16.3	5	6.2	8.72	3.5	0.06	2.17	0.1
YangchengL	201502	0.0191	13.5	4.4	5.3	8.87	4	0.06	0.88	0.02
YangchengL	201503	0.0193	9.8	3	7.6	8.05	1.6	0.08	1.36	0.02
YangchengL	201504	0.0186	12.9	3.6	19	7.85	2.4	0.04	1.34	0.04
YangchengL	201505	0.0222	9.9	4	21.1	8.43	2.9	0.03	1.08	0.1
YangchengL	201506	0.0183	6.8	4.4	24.1	8.01	2.4	0.07	0.73	0.02
YangchengL	201507	0.0195	7.8	3.5	24.6	7.86	1.7	0.36	1.18	0.02
YangchengL	201508	0.0151	7.4	4.6	32.9	8.08	3.8	0.08	0.73	0.09
YangchengL	201509	0.0183	7	4.5	27.3	8.03	3.2	0.06	0.72	0.07
YangchengL	201510	0.0188	7.2	4	20.9	7.67	1.2	0.14	0.76	0.04
YangchengL	201511	0.016	7.8	4.6	15.5	7.74	1.5	0.13	0.92	0.02
YangchengL	201512	0.0159	10.4	3.7	10.6	7.77	1.5	0.25	1.92	0.02
YangchengL	201601	0.0109	15.6	3.9	9.2	8.5	2	0.03	1.84	0.06
YangchengL	201602	0.0123	13	3.8	3.9	7.9	1.6	0.12	2.02	0.04
YangchengL	201603	0.0114	10.6	3.8	9.5	8.1	1	0.03	1.68	0.05
YangchengL	201604	0.0156	14.4	3.4	15.2	8.3	2.3	0.06	1.48	0.04
YangchengL	201605	0.0152	10	3.7	22.2	8.7	2.2	0.02	1.29	0.08
YangchengL	201606	0.00649	8.6	3.7	22.6	8.2	2.3	0.03	1.82	0.08
YangchengL	201607	0.012	8.5	3.5	26.7	7.78	2.2	0.11	1.84	0.04
YangchengL	201608	0.0136	6.3	6.4	31.1	7.98	3	0.03	0.79	0.1
YangchengL	201609	0.014	6.2	4.6	27.3	7.38	2.2	0.02	0.6	0.04
YangchengL	201610	0.0121	5.9	3.7	22.4	7.69	1	0.16	0.72	0.03
YangchengL	201611	0.0103	8.7	3.2	15.9	7.92	1.3	0.16	1.87	0.08
YangchengL	201612	0.0123	12.1	3.4	10.1	7.98	2.4	0.11	1.51	0.07
Yangzonghai	201201	0.016	8.03	2.9	12.6	8.48	1.33	0.107	0.68	0.037
Yangzonghai	201202	0.017	9.29	2.3	12.6	8.62	0.7	0.167	0.62	0.038
Yangzonghai	201203	0.009	7.12	2.6	14	8.46	1.1	0.143	0.74	0.027
Yangzonghai	201204	0.007	6.63	2.3	18.2	8.58	1.1	0.143	0.42	0.031
Yangzonghai	201205	0.017	8.58	2.8	18.8	8.2	1.8	0.159	0.88	0.042
Yangzonghai	201206	0.015	9.06	3.5	21.6	8.76	1.1	0.095	0.7	0.045
Yangzonghai	201207	0.01	7.58	6.5	23.4	8.76	1.5	0.101	0.45	0.037
Yangzonghai	201208	0.019	5.46	2.7	22.8	8.81	2.4	0.115	0.49	0.036
Yangzonghai	201209	0.025	5.28	3.2	23.1	8.66	1.6	0.143	0.71	0.042
Yangzonghai	201210	0.018	8.87	3.3	20.7	7.52	1.7	0.11	0.68	0.045
Yangzonghai	201211	0.014	6.76	2	19.6	8.43	1.8	0.101	0.5	0.039
Yangzonghai	201212	0.01	7.81	3	17.1	7.9	1	0.273	0.84	0.042
Yangzonghai	201401	0.015	9.01	2.5	16.2	7.96	1.6	0.08	0.81	0.041
Yangzonghai	201402	0.019	8.69	2.7	12.8	8.28	1.2	0.119	0.5	0.036
Yangzonghai	201403	0.01	9.04	3.4	14.6	8.22	1.4	0.162	0.98	0.036
Yangzonghai	201404	0.017	6.89	2	17.1	8.52	1.9	0.163	0.68	0.038
Yangzonghai	201405	0.009	8.99	3.7	17	8.02	1	0.189	0.5	0.036
Yangzonghai	201406	0.006	9.01	3.4	18.2	7.91	1.3	0.13	0.52	0.032
Yangzonghai	201407	0.011	6.6	3.7	24.1	8.16	1	0.146	0.5	0.03
Yangzonghai	201408	0.01	8.81	2.4	19.8	7.77	1.9	0.187	0.45	0.032
Yangzonghai	201409	0.012	8.63	2.1	24.2	8.5	2.1	0.192	0.44	0.03
Yangzonghai	201410	0.016	8.41	2.3	20.1	7.67	1.6	0.142	0.58	0.034
Yangzonghai	201411	0.012	8.72	2.1	15.3	7.81	1.5	0.115	0.99	0.041
Yangzonghai	201412	0.009	8.04	2.6	17.1	7.92	1	0.336	0.96	0.047
Yangzonghai	201501	0.02	8.92	2.2	14.7	8.05	1.6	0.121	0.88	0.033
Yangzonghai	201502	0.009	9.32	2.6	13.1	8.17	1.2	0.075	1.1	0.028
Yangzonghai	201503	0.01	8.93	1.9	16.3	7.81	2	0.098	0.72	0.031
Yangzonghai	201504	0.006	7.78	3.3	14.8	7.77	2.5	0.124	0.63	0.028
Yangzonghai	201505	0.006	7.07	2.4	21.3	8.82	2.9	0.092	0.7	0.032
Yangzonghai	201506	0.008	7.76	2.9	24.6	8.91	1.7	0.156	0.49	0.031
Yangzonghai	201507	0.006	7.23	3.5	18.4	8.04	1.8	0.156	0.7	0.035
Yangzonghai	201508	0.003	7.16	2.9	20.1	7.68	2	0.205	0.63	0.039
Yangzonghai	201509	0.006	8.31	3.4	22.1	7.78	1.7	0.233	0.94	0.029
Yangzonghai	201510	0.003	8.19	3.2	17.1	8.13	1.2	0.151	0.58	0.029
Yangzonghai	201511	0.001	7.92	1.9	18.9	8.06	1.1	0.128	0.86	0.039
Yangzonghai	201512	0.01	6.42	3.5	16.9	8.46	1.8	0.398	1.07	0.03
Yangzonghai	201601	0.009	9.1	2.8	11.9	7.9	1.5	0.044	0.81	0.034
Yangzonghai	201602	0.005	8.2	2.7	12	7.2	1	0.057	0.81	0.019
Yangzonghai	201603	0.007	8.2	2.6	12.3	8.3	2.2	0.114	0.89	0.039
Yangzonghai	201604	0.004	8.3	2.4	14.9	7.5	1.7	0.054	0.65	0.036
Yangzonghai	201605	0.012	8.1	3.2	18.6	8.7	2.1	0.077	0.88	0.033
Yangzonghai	201606	0.007	7.4	2.6	22	8.7	1.6	0.092	0.7	0.03
Yangzonghai	201607	0.005	7.8	3	22.3	8.41	1.4	0.121	0.61	0.028
Yangzonghai	201608	0.004	7.65	2.4	25.5	8.46	1.4	0.134	0.54	0.033
Yangzonghai	201609	0.008	7.16	2.5	22.9	8.52	0.9	0.134	0.84	0.036
Yangzonghai	201610	0.007	7.12	3.2	20.3	8.3	1.6	0.086	0.59	0.031
Yangzonghai	201611	0.013	6.56	3	20.9	7.84	1.4	0.248	0.69	0.028
Yangzonghai	201612	0.007	6.3	2.9	15.9	8.23	1.4	0.212	0.53	0.035
ZhangheR	201201	0.00116	10.9	1.8	9.5	8.13	0.95	0.135	0.445	0.005
ZhangheR	201202	0.00113	11.55	1.9	6	8.275	1	0.075	0.385	0.005
ZhangheR	201203	0.00079	12.25	2	8	7.985	1.85	0.1	0.4	0.005
ZhangheR	201204	0.0011	13	2.25	15	8.075	1.6	0.06	0.465	0.005
ZhangheR	201205	0.00307	11.2	2.15	21	8.15	1.05	0.03	0.455	0.005
ZhangheR	201206	0.00195	9.83	1.65	21	8.185		0.035	0.4
ZhangheR	201207	0.00249	8.3	2.3	29.5	8.35		0.03	0.41
ZhangheR	201208	0.00196	7.9	2	29.5	8.42	0.6	0.01	0.455
ZhangheR	201209	0.00129	9.35	1.75	29	8.375	0.65	0.05	0.43
ZhangheR	201210	0.001	9.015	1.65	22	8.415	0.7	0.05	0.475
ZhangheR	201211	0.000645	9.7	1.6	18.5	8.415	0.55	0.05	0.445
ZhangheR	201212	0.002165	9.85	1.65	10	8.315		0.055	0.39
ZhangheR	201401	0.00125	9.3	1.15	8	7.935	1.2	0.075	0.435	0.005
ZhangheR	201402	0.0011	5.45	0.45	3	3.55	0.1
ZhangheR	201403	0.00045	11.6	1.65	6	8.2	1.25	0.055	0.435	0.005
ZhangheR	201404	0.00085	10.05	2.05	17	8.325	1.1	0.012	0.465	0.005
ZhangheR	201405	0.00125	4.245	0.35	9.5	3.61
ZhangheR	201406	0.0013	8.85	1.35	26.5	8.33	1.05	0.012	0.43	0.005
ZhangheR	201407	0.00255	11.05	1.65	27	8.195	1.05	0.012	0.32	0.005
ZhangheR	201408	0.00105	8.05	1.65	30	8.235	0.95	0.012	0.38	0.005
ZhangheR	201409	0.0007	8.35	2.2	24	8.14	0.7	0.01	0.36	0.005
ZhangheR	201410	0.0013	9	1.6	25	8.305	1.15	0.012	0.45	0.005
ZhangheR	201411	0.0013	9.825	1.4	18.5	8.22	0.2	0.1	0.41	0.005
ZhangheR	201412	0.00155	4.6	0.05	5	3.635	0
ZhangheR	201501	0.00135	5.1	0.25	4	3.625	0.5
ZhangheR	201502	0.0041	10.75	1.3	4	8.29	1.4	0.04	0.475	0.005
ZhangheR	201503	0.0006	12.15	1.45	9.5	8.29	0.85	0.33	0.45	0.005
ZhangheR	201504	0.00095	4.95	0.2	5	3.645
ZhangheR	201505	0.001	4.27	0.25	10.5	3.68
ZhangheR	201506	0.0007	9.1	1.85	24.5	8.235	0.6	0.175	0.4	0.005
ZhangheR	201507	0.00115	3.66	0.45	12	3.665	0.3
ZhangheR	201508	0.00095	3.45	0.4	17	3.63
ZhangheR	201509	0.00105	8.65	1.9	30.5	8.22	0.75	0.23	0.49	0.015
ZhangheR	201510	0.0012	8.2	1.75	23.5	8.17	0.85	0.17	0.32	0.02
ZhangheR	201511	0.0007	9.2	1.7	18	8.21	0.6	0.195	0.33	0.0125
ZhangheR	201512	0.0034	10.185	1.75	14.5	8.3	0.9	0.225	0.48	0.005
ZhangheR	201601	0.00355	10.75	1.65	5	8.05	0.6	0.24	0.295	0.005
ZhangheR	201602	0.00185	11.5	1.55	4.5	8.1	1.25	0.13	0.395	0.005
ZhangheR	201603	0.00155	9.25	1.55	15	8.1	0.25	0.0815	0.25	0.005
ZhangheR	201604	0.0013	9.65	1.35	20	8.2	0.475	0.045	0.365	0.005
ZhangheR	201605	0.002	9.05	1.65	20	8.35	0.8	0.0495	0.41	0.005
ZhangheR	201606	0.0014	8.65	1.45	23	8.3	0.7	0.041	0.455	0.005
ZhangheR	201607	0.001	9.27	1.55	24	8.31	0.65	0.0765	0.455	0.005
ZhangheR	201608	0.00085	7.87	1.9	31	8.325	0.25	0.057	0.41	0.005
ZhangheR	201609	0.0017	8.27	1.8	28	8.245	0.65	0.111	0.3	0.005
ZhangheR	201610	0.00115	8.64	1.8	21	8.155	0.65	0.031	0.33	0.005
ZhangheR	201611	0.0012	8.87	1.7	17	8.205	0.425	0.0855	0.315	0.005
ZhangheR	201612	0.00065	8.65	1.7	13	8.205	0.9	0.07	0.15	0.005
DongpuR	200701	0.003	9.08	2.55	4	7.48	1	0.244	0.792	0.038
DongpuR	200702	0.002	8.8	1.8	6	7.54	1	0.169	0.772	0.034
DongpuR	200703	0.005	8.96	2.65	6	7.53	1	0.183	0.97	0.011
DongpuR	200704	0.004	9.25	3.27	12.1	7.64	1	0.169	0.812	0.041
DongpuR	200705	0.001	8.13	3.11	22.5	7.85	1	0.284	0.854	0.032
DongpuR	200706	0.002	8.07	3.28	24.2	7.84	1	0.307	0.927	0.031
DongpuR	200707	0.002	7.95	2.57	26.4	7.81	1	0.268	0.993	0.03
DongpuR	200708	0.004	7.64	3.41	28.5	7.31	1	0.386	0.78	0.046
DongpuR	200709	0.003	7.2	4.45	26.8	7.25	1	0.298	0.609	0.047
DongpuR	200710	0.002	6.79	3.32	20.6	7.38	1	0.224	0.475	0.05
DongpuR	200711	0.002	7.94	2.69	18.2	7.24	1	0.214	0.875	0.012
DongpuR	200712	0.002	8.34	2.87	11	7.13	1	0.244	0.673	0.027
DongpuR	200801	0.001	9.08	2.48	4	7.48	1	0.239	0.713	0.038
DongpuR	200802	0.001	7.76	2.72	3.6	7.92	1	0.195	0.814	0.032
DongpuR	200803	0.005	7.67	2.74	11.2	7.29	1	0.195	0.814	0.032
DongpuR	200804	0.005	9.25	4.4	19.3	7.46	1	0.19	0.752	0.035
DongpuR	200805	0.004	8.7	2.64	22.7	7.55	3.2	0.278	0.634	0.047
DongpuR	200806	0.006	8.56	3.51	25.8	7.56	3.2	0.299	0.302	0.038
DongpuR	200807	0.007	8	2.36	28.6	7.19	1	0.485	0.973	0.049
DongpuR	200808	0.003	8.15	3.76	31.7	7.5	2.6	0.258	0.777	0.037
DongpuR	200809	0.005	8.83	3.64	26	7.36	1	0.314	0.597	0.036
DongpuR	200810	0.002	8.25	4.37	25.1	8.09	1	0.258	0.653	0.031
DongpuR	200811	0.002	9.12	2.71	21.5	8.32	2.1	0.227	0.515	0.035
DongpuR	200812	0.001	11.19	2.87	11.4	7.59	1	0.294	0.95	0.02
DongpuR	200901	0.002	9.25	2.49	5.1	8.1	2.5	0.216	0.973	0.035
DongpuR	200902	0.002	7.86	3.12	6	7.95	2.1	0.237	0.976	0.03
DongpuR	200903	0.008	10.74	2.02	6.4	7.39	2.4	0.27	0.931	0.032
DongpuR	200904	0.0086	9.47	3.12	12.7	7.52	2.9	0.206	0.812	0.044
DongpuR	200905	0.009	8.71	2.17	22.7	7.55	3.8	0.078	0.812	0.016
DongpuR	200906	0.0093	8.72	3.03	21.6	7.58	3	0.191	0.701	0.044
DongpuR	200907	0.007	8.02	3.02	27.9	7.26	1	0.32	0.828	0.02
DongpuR	200908	0.009	7.9	2.88	28.5	7.44	2.7	0.196	0.917	0.03
DongpuR	200909	0.009	7.54	2.77	27.4	7.01	1	0.155	0.876	0.028
DongpuR	200910	0.008	7.45	2.34	26.4	7.1	2.4	0.072	0.606	0.032
DongpuR	200911	0.0074	9.03	2.7	19	7.28	1	0.448	0.922	0.012
DongpuR	200912	0.003	10.36	2.7	8.4	7.58	2.15	0.237	0.933	0.017
DongpuR	201001	0.009	8.7	2.94	2.2	7.6	1	0.129	0.77	0.016
DongpuR	201002	0.0056	9.21	4	6.4	8.08	1	0.077	0.959	0.011
DongpuR	201003	0.005	8.74	3.04	6.9	7.71	2.2	0.139	0.912	0.016
DongpuR	201004	0.005	9.02	2.41	14.9	7.52	2.3	0.149	0.897	0.013
DongpuR	201005	0.011	9.55	2.92	21.5	8.51	1	0.098	0.967	0.02
DongpuR	201006	0.006	9.66	3.15	23	8.01	1	0.093	0.771	0.024
DongpuR	201007	0.011	9.42	3.88	29	8.07	2.4	0.077	0.423	0.05
DongpuR	201008	0.0051	9.36	2.97	32.6	7.85	1	0.134	0.95	0.019
DongpuR	201009	0.01408	8.96	3.61	29.7	7.89	2.1	0.168	0.935	0.05
DongpuR	201010	0.00874	6.3	2.45	23.6	7.61	2.3	0.121	0.91	0.019
DongpuR	201011	0.01339	6.23	2.7	15.5	7.9	1	0.184	0.94	0.013
DongpuR	201012	0.00396	6.79	2.71	14.1	7.36	2.3	0.332	0.61	0.021
DongpuR	201101	0.0067	7.34	2.38		7.11	2.2	0.205	0.92	0.03
DongpuR	201102	0.0059	11.27	2.38		7.54	2.15	0.137	0.543	0.017
DongpuR	201103	0.0061	8.9	1.79		7.38	1	0.205	0.885	0.03
DongpuR	201104	0.0045	10.6	1.87		7.59	1	0.211	0.572	0.048
DongpuR	201105	0.0038	7.3	2.44		7.55	1	0.258	0.84	0.05
DongpuR	201106	0.0039	8	1.83		7.97	2.2	0.124	1.24	0.031
DongpuR	201107	0.0066	8.4	2.73		7.88	2.1	0.099	0.652	0.046
DongpuR	201108	0.0075	7.7	2.66		7.8	2.1	0.177	0.801	0.044
DongpuR	201109	0.0074	8.8	2.85		7.84	1	0.202	0.82	0.026
DongpuR	201110	0.00681	7.22	2.98		7.5	1	0.197	0.947	0.031
DongpuR	201111	0.00331	8.98	3.27		7.63	2.7	0.212	0.78	0.028
DongpuR	201112	0.0047	8.42	2.91		7.85	2.4	0.191	0.972	0.034
DongpuR	201201	0.0029	7.32	3.13	4	8.03	2.6	0.222	0.866	0.035
DongpuR	201202	0.00667	8.7	2.96	2	7.7	2.9	0.089	0.967	0.036
DongpuR	201203	0.00471	8.52	1.84	6.5	7.36		0.153	0.96	0.028
DongpuR	201204	0.00363	9.73	2.86	19.7	8.05	2.7	0.138	0.528	0.03
DongpuR	201205	0.0049	9.04	1	22.6	7.86	3	0.222	0.918	0.038
DongpuR	201206	0.00314	9.08	4.04	24.9	8.01	2.8	0.123	0.978	0.047
DongpuR	201207	0.00351	9.33	2.51	28.5	8.02	2	0.148	0.964	0.03
DongpuR	201208	0.00757	9.03	2.47	30.6	8.12		0.148	0.914	0.028
DongpuR	201209	0.0143	9.11	2.51	25.3	8.15	2.4	0.128	0.89	0.02
DongpuR	201210	0.00544	8.04	3.05	21.4	8.04	2.1	0.094	0.975	0.019
DongpuR	201211	0.00517	9.08	3.14	6.7	7.96	2.4	0.084	0.918	0.031
DongpuR	201212	0.00404	8.62	3.08	3.6	7.85	2.4	0.049	0.912	0.035
DongpuR	201501	0.00326	8.48	3.04	5.8	7.88	1	0.276	0.979	0.018
DongpuR	201502	0.0024	8.04	2.63	5.3	7.25	2.2	0.163	0.979	0.019
DongpuR	201503	0.00213	8.08	2.4	9.6	7.95	2.2	0.128	0.975	0.021
DongpuR	201504	0.00115	7.85	2.53	15.7	8.11	1	0.123	0.968	0.029
DongpuR	201505	0.00243	7.48	2.63	24.8	7.92	1	0.094	0.934	0.03
DongpuR	201506	0.00353	7.48	2.82	24.8	7.81	1	0.064	0.815	0.04
DongpuR	201507	0.0038	7.36	3.38	25.8	7.62	2.3	0.163	0.64	0.049
DongpuR	201508	0.0079	8.34	2.93	31.5	6.96	1	0.074	0.742	0.041
DongpuR	201509	0.00115	8.8	2.88	27.1	6.85	1	0.197	0.267	0.032
DongpuR	201510	0.00405	8.75	2.93	23.4	6.95	1	0.222	0.692	0.042
DongpuR	201511	0.00987	9.23	3.32	12.6	6.96	2.4	0.138	0.86	0.042
DongpuR	201512	0.00987	9.56	2.54	11.4	6.95	1	0.852	0.989	0.049
DongpuR	201601	0.01101	9.5	2.71	13.6	7.1	1	0.187	0.964	0.04
DongpuR	201602	0.00925	12.2	2.76	3.7	7.2	1	0.143	0.992	0.033
DongpuR	201603	0.00702	11.9	2.46	10.6	7.2	1	0.084	0.939	0.025
DongpuR	201604	0.0018	11.3	2.14	13.6	7.2	1	0.133	1.02	0.021
DongpuR	201605	0.0061	10	3.3	21.6	7.2	1	0.185	0.941	0.038
DongpuR	201606	0.01605	9.5	3.99	23	7.5	2.1	0.165	0.986	0.038
DongpuR	201607	0.0102	9.58	4.22	22.7	7.09	2.1	0.41	0.862	0.039
DongpuR	201608	0.0089	8.76	3.72	27.3	7.21	2.1	0.228	0.445	0.049
DongpuR	201609	0.0109	7.28	2.99	26.5	7.26	1	0.32	0.982	0.048
DongpuR	201610	0.0028	7.52	3.54	21.3	7.26	2.1	0.254	0.998	0.041
DongpuR	201611	0.0051	8.26	3.99	10.9	7.26	2.8	0.182	1.45	0.047
DongpuR	201612	0.0107	8.68	4.48	10.2	7.38	2.1	0.369	1.24	0.048
ChaoL	200701	0.00756833	10.93	4.33667	6.33333	7.995	2.48667	0.6095	1.38833	0.116167
ChaoL	200702	0.00713	11.44	4.28833	6.9	7.87833	4.37	0.709	1.39	0.0981667
ChaoL	200703	0.006155	9.80333	4.88667	9.56667	7.89333	3.79333	0.695667	1.46167	0.1205
ChaoL	200704	0.0237533	8.75167	5.08333	12.8	7.86833	2.70667	0.748833	1.615	0.105167
ChaoL	200705	0.0107883	7.18167	5.47333	22.1333	7.77833	2.61	0.6395	1.58167	0.141167
ChaoL	200706	0.0191483	7.59333	5.44667	25.1333	7.58167	2.96667	0.6145	1.65833	0.192833
ChaoL	200707	0.00774	6.245	4.56667	28.7667	7.725	4.53167	0.624333	1.41667	0.140833
ChaoL	200708	0.0327017	6.36667	5.01167	29.05	8.125	2.89833	0.543333	1.0515	0.204
ChaoL	200709	0.02598	5.88833	5.41667	27.3833	7.59667	4.61667	0.401	1.32667	0.227833
ChaoL	200710	0.0240383	7.37	4.46167	24.5833	7.94667	4.61667	0.313333	1.04133	0.1485
ChaoL	200711	0.0125717	8.26833	4.04667	16.65	7.75167	3.86667	0.475667	1.25033	0.094
ChaoL	200712	0.005315	9.41333	5.035	10.7333	7.85	4.1	0.584833	1.231	0.103167
ChaoL	200801	0.0163983	9.87833	4.79667	7.58333	8.005	2.975	0.2795	1.505	0.0883333
ChaoL	200802	0.00822833	10.45	4.15333	4.76667	7.76	2.00833	0.623333	2.10833	0.0955
ChaoL	200803	0.00516667	10.5783	4.39	11.35	7.92667	2.7	0.367667	1.66	0.0553333
ChaoL	200804	0.00483333	9.185	5.57167	17.6667	7.785	3.44167	0.406833	2.555	0.152333
ChaoL	200805	0.0123333	7.13167	4.32167	23.75	7.785	3.14667	0.592167	1.99	0.119
ChaoL	200806	0.0251667	7.78833	4.70833	27.4667	7.875	2.53333	0.389833	1.41167	0.1395
ChaoL	200807	0.0293967	7.525	5.195	30.15	7.92	3.35	0.487333	1.91333	0.147667
ChaoL	200808	0.0308183	7.015	5.37833	29.5167	7.89167	2.70333	0.410833	1.51733	0.164833
ChaoL	200809	0.051045	8.61833	5.69667	28.6167	7.82167	3.06667	0.3225	1.12367	0.172667
ChaoL	200810	0.0202583	8.09333	5.04833	26.9167	7.79167	2.83333	0.3915	1.25533	0.138
ChaoL	200811	0.020295	8.61833	4.405	24.4667	7.80833	3.08333	0.543667	1.47	0.124167
ChaoL	200812	0.0104567	9.88167	4.56	14.5333	7.76333	2.96667	0.458333	1.83833	0.104
ChaoL	200901	0.00882	12.1583	4.73667	5.91667	7.64333	2.11667	0.511333	1.445	0.111
ChaoL	200902	0.00619833	11.24	5.17833	8.9	7.82167	2.38333	0.385667	0.985	0.087
ChaoL	200903	0.00541833	9.69167	4.49667	8.98333	7.85667	2.05	0.508833	2.26667	0.0741667
ChaoL	200904	0.00494	10.415	4.85167	19.5833	7.48667	3.35	0.487667	1.645	0.0738333
ChaoL	200905	0.0065	6.53	4.60667	25.3833	7.85667	1.96667	0.379167	1.2915	0.0695
ChaoL	200906	0.03145	8.39667	5.11167	25.2667	8.27667	2.48333	0.4435	1.735	0.0731667
ChaoL	200907	0.0265	7.10833	5.865	27.7833	7.71833	2.83333	0.450833	1.56333	0.102333
ChaoL	200908	0.0298	7.01333	5.105	26.7333	7.88333	2.58333	0.4295	1.74833	0.0953333
ChaoL	200909	0.0290333	8.29667	4.43167	27.6667	8.14833	3.93333	0.3285	1.24833	0.0965
ChaoL	200910	0.0190167	8.18	3.975	24.25	8	2.73333	0.282	1.056	0.0755
ChaoL	200911	0.0127833	9.42	4.095	17.05	7.59667	2.28333	0.307	1.235	0.0725
ChaoL	200912	0.00995	11.575	4.50667	9.38333	7.72333	2.58333	0.454167	1.02333	0.0596667
ChaoL	201001	0.0049	11.3883	4.64333	3.71667	7.69	1.71667	0.6865	1.45333	0.0656667
ChaoL	201002	0.0053	11.8467	4.56667	7.81667	7.58	2.06667	0.457333	1.45333	0.068
ChaoL	201003	0.0085	10.0567	4.415	7.73333	7.76167	2.91667	0.618	1.50333	0.0778333
ChaoL	201004	0.0148333	9.33667	4.21833	14.3833	7.77667	2.45	0.403333	1.47833	0.0675
ChaoL	201005	0.0171667	8.16667	4.93	17.7333	7.76167	2.45	0.445667	1.50833	0.0563333
ChaoL	201006	0.0176667	8.68167	3.84833	23.9333	7.78167	3	0.369667	1.407	0.0915
ChaoL	201007	0.00818333	6.84667	4.545	29.55	7.99833	3.93333	0.421333	1.575	0.102167
ChaoL	201008	0.025895	8.575	4.96667	30.7167	8.775	3.65	0.280167	1.05667	0.113667
ChaoL	201009	0.0111567	8.485	4.41333	29.8	8.61333	3.26667	0.349667	1.14667	0.105167
ChaoL	201010	0.0175483	8.57833	5.49167	21.9167	8.77333	3.6	0.386833	1.51333	0.127667
ChaoL	201011	0.00823667	8.93167	4.48333	15.5833	8.09667	2.65	0.472833	1.25	0.0778333
ChaoL	201012	0.00224833	10.4917	4.825	14.2333	7.41	2.76667	0.538833	1.23	0.0766667
ChaoL	201101	0.00731667	11.4633	3.60667		8.03167	2.42	0.601167	1.26883	0.131
ChaoL	201102	0.0058	11.3233	4.23333		7.805	2.96833	0.672	1.38	0.111667
ChaoL	201103	0.0118	10.9283	4.24333		8.16667	2.55333	0.3595	1.76383	0.0791667
ChaoL	201104	0.0123383	9.77667	4.10333		8.09333	3.55833	0.333833	1.76067	0.0775
ChaoL	201105	0.0183367	8.725	4.63833		8.24333	3.725	0.350167	1.89567	0.103167
ChaoL	201106	0.00836833	8.1	4.81833		8.145	3.49	0.503833	1.5765	0.082
ChaoL	201107	0.0140483	7.45333	4.62		8.54	2.47667	0.314	1.755	0.107667
ChaoL	201108	0.0409617	8.52167	4.92333		8.73167	2.935	0.305667	1.15217	0.0915
ChaoL	201109	0.0208917	7.845	4.32333		8.21333	2.65667	0.450667	1.85617	0.154333
ChaoL	201110	0.00902167	7.72667	4.035		7.62667	2.765	0.3755	1.2205	0.0873333
ChaoL	201111	0.0115817	8.575	4.78833		8.03	3.62833	0.250833	1.571	0.131167
ChaoL	201112	0.00849833	10.11	4.195		7.95333	3.41	0.402	1.38433	0.112667
ChaoL	201201	0.0190483	8.88833	4.45167	6.61667	7.87833	2.96167	0.468167	1.37117	0.0765
ChaoL	201202	0.0225817	10.9683	4.29333	6.3	7.97667	3.00833	0.324333	1.41633	0.0698333
ChaoL	201203	0.0204717	10.0383	4.45667	7.4	7.72833	2.67833	0.262333	2.07833	0.0566667
ChaoL	201204	0.00415167	8.85667	3.92167	17.1333	8.01667	2.375	0.388	1.63867	0.0771667
ChaoL	201205	0.0213517	8.54	4.91667	24.05	8.33833	2.66833	0.463667	2.18333	0.0873333
ChaoL	201206	0.0108567	8.57667	4.775	25.3333	8.19167	3.515	0.455833	1.55833	0.0918333
ChaoL	201207	0.0164367	8.38	4.63167	29.9167	8.065	3.11833	0.706667	1.80167	0.117667
ChaoL	201208	0.0200017	8.29167	4.39833	30.5	8.18333	3.10833	0.293333	0.998833	0.0848333
ChaoL	201209	0.0130217	8.08333	4.92333	26.1833	7.95333	3.78833	0.3085	0.9655	0.0818333
ChaoL	201210	0.0163567	8.35	5.30167	23.4167	8.48	2.96667	0.292667	1.611	0.0901667
ChaoL	201211	0.0372667	9.15167	5.43333	13.4333	8.315	3.33833	0.355667	1.42017	0.112
ChaoL	201212	0.0111283	8.975	4.92167	8.38333	8.2	2.89167	0.399333	1.09333	0.0631667
ChaoL	201401	0.01509	11.345	5.36833	5.52	7.84833	2.96	0.453	1.7915	0.083
ChaoL	201402	0.0222233	11.0267	4.93667	4.75833	7.87833	2.44333	0.479667	2.26583	0.0906667
ChaoL	201403	0.01954	10.5733	5.23333	9.305	7.94	3.91333	0.895833	2.462	0.109667
ChaoL	201404	0.00308	8.52	3.55667	17.95	7.73333	2.615	0.32	1.66	0.0563333
ChaoL	201405	0.0100717	9.02167	5.13833	20.8167	8.19667	3.91833	0.341833	1.544	0.0768333
ChaoL	201406	0.0100333	7.935	3.97833	24.15	7.91167	2.46667	0.748667	1.4915	0.0993333
ChaoL	201407	0.01922	9.695	4.45167	27.5167	8.43167	2.905	0.403333	1.46767	0.0708333
ChaoL	201408	0.010441	9.79333	3.66833	32.4667	9.53167	3.00833	0.259	1.15917	0.0703333
ChaoL	201409	0.0233617	8.67167	4.14667	25.75	8.51833	3.48333	0.2515	1.46733	0.0985
ChaoL	201410	0.00646667	9.10333	3.96833	22.8333	8.21333	2.85667	0.3175	1.53833	0.0831667
ChaoL	201411	0.0314533	8.92	4.64167	16.2667	8.15833	2.56667	0.363	1.78167	0.0563333
ChaoL	201412	0.00447833	10.0883	4.06167	8.55167	8.36	2.78667	0.398	1.275	0.0545
ChaoL	201501	0.0373067	13.6517	4.59167	6.96667	8.475	2.81333	0.1695	2.1335	0.0631667
ChaoL	201502	0.0180583	12.8	4.56167	4.61667	8.52667	2.61833	0.3275	1.1545	0.047
ChaoL	201503	0.01204	11.5333	4.715	8.23333	8.08	2.54167	0.379167	1.55	0.0663333
ChaoL	201504	0.00800833	9.93167	4.395	16.85	7.72167	2.12333	0.582833	1.34767	0.0576667
ChaoL	201505	0.005515	8.895	4.26167	23.3667	8.04	2.28667	0.498333	2.02067	0.073
ChaoL	201506	0.00362333	7.51667	4.53833	24.6667	8.10333	2.16833	0.3235	1.84667	0.0835
ChaoL	201507	0.00904667	7.75	4.625	30.35	8.425	3.06	0.2835	1.641	0.1425
ChaoL	201508	0.00510167	6.75167	6.40333	30.3	8.79667	1.32333	0.175167	1.52283	0.067
ChaoL	201509	0.00377	8.50167	5.6	28.2	9.10333	3.08667	0.110833	0.671333	0.136333
ChaoL	201510	0.00288	8.315	5.18333	20.7	8.045	2.81333	0.292667	1.146	0.199667
ChaoL	201511	0.00450167	10.305	4.325	16.65	8.48167	1.68	0.157167	1.00933	0.142833
ChaoL	201512	0.00271	11.6	4.22833	9.25	8.37333	1.70667	0.188167	1.34567	0.110167
ChaoL	201601	0.00981667	12.55	5.70167	7.95	8.48333	3.23167	0.186667	1.35467	0.079
ChaoL	201602	0.0166333	14.2833	4.84833	2.85	8.38333	3.13167	0.5225	1.83017	0.0613333
ChaoL	201603	0.00940333	11.8	4.68833	10.7333	8.76667	2.58	0.332333	1.28517	0.0651667
ChaoL	201604	0.00950833	10.35	4.06833	16.3	7.91667	2.00667	0.648667	2.10833	0.0773333
ChaoL	201605	0.007045	8.8	3.47667	22.7333	7.83333	2.57833	0.1335	1.67	0.0678333
ChaoL	201606	0.00393167	8.73333	4.60833	23.7333	7.96667	2.85	0.319833	1.48417	0.101833
ChaoL	201607	0.00482667	8.76167	4.57667	29.7833	7.96667	2.74833	0.147333	1.98167	0.0926667
ChaoL	201608	0.00783	7.805	4.17	32.75	8.09167	1.845	0.11	1.1885	0.0616667
ChaoL	201609	0.00545833	8.40167	5.14	27.75	8.665	3.12333	0.1365	0.964167	0.130833
ChaoL	201610	0.00253333	8.22167	4.41667	21.6833	7.85667	1.26667	0.15195	1.29	0.104167
ChaoL	201611	0.00237	9.79833	4.81667	15.3833	8.04	1.42167	0.324667	2.11317	0.159
ChaoL	201612	0.007245	11.1667	4.16667	11.5667	8.24	2.35833	0.203333	2.54667	0.0878333
DanjiangkouR	200701	0.00165	9.1875	2.0625	8.025	8.12	2.25	0.088	0.90725	0.005
DanjiangkouR	200702	0.00165	9.45	1.7	7.75	8.2875	2	0.07975	1.07225	0.005
DanjiangkouR	200703	0.0021	9.94	1.5	6.375	8.0775	1.5	0.059	0.95775	0.01
DanjiangkouR	200704	0.001385	9.285	1.28	13.75	8.3	2	0.0535	0.994	0.005
DanjiangkouR	200705	0.001725	7.76	1.4825	18.5	7.95	1.25	0.0795	1.01625	0.005
DanjiangkouR	200706	0.00165	7.27	1.965	23.5	8.2925	2.1175	0.0855	1.0045	0.005
DanjiangkouR	200707	0.00165	7.06	2.2925	23.25	8.2575	2	0.076	0.904	0.00725
DanjiangkouR	200708	0.00165	7.945	2.96	27.125	8.165	2.1275	0.107	0.9975	0.0115
DanjiangkouR	200709	0.0017025	7.955	3.135	25.25	8.305	2.5	0.10475	0.98	0.0265
DanjiangkouR	200710	0.001385	8.9375	2.115	19.5	7.9425	1.6625	0.0895	0.93925	0.008
DanjiangkouR	200711	0.00159	9.0575	1.875	15.5	8.1175	2.0075	0.1025	0.85725	0.005
DanjiangkouR	200712	0.001385	9.165	2.6	12.25	8.205	2.05	0.067	1.00825	0.01925
DanjiangkouR	200801	0.001385	9.85	2.44	11.5	8.2475	2	0.144	1.09325	0.01925
DanjiangkouR	200802	0.001385	9.1	2.525	7.5	7.99	2	0.143	1.1165	0.01075
DanjiangkouR	200803	0.001385	10.2575	1.905	10	8.095	2	0.0235	1.133	0.0165
DanjiangkouR	200804	0.0015	9.5825	2.2325	14.5	8.455	2	0.108	1.27125	0.01625
DanjiangkouR	200805	0.001635	8.2125	2.0425	19.25	8.24	2	0.09475	1.12625	0.01625
DanjiangkouR	200806	0.00167	8.2975	1.925	23	8.1575	2.25	0.06075	1.37375	0.005
DanjiangkouR	200807	0.0018425	8.49	2.0525	28	8.3025	2.0025	0.06875	0.8825	0.005
DanjiangkouR	200808	0.00184	8.495	2.7175	25.75	8.3625	2.1375	0.053	0.81075	0.0135
DanjiangkouR	200809	0.001635	8.5175	2.0875	24.75	8.35	2.75	0.0885	0.98675	0.00825
DanjiangkouR	200810	0.001885	9.3025	1.93	21	8.2975	1.5	0.18325	1.14675	0.019
DanjiangkouR	200811	0.00184	9.2575	1.555	18.5	7.9825	2.2925	0.19425	1.05175	0.01125
DanjiangkouR	200812	0.001385	9.3575	1.775	11	8.155	2	0.157	1.08825	0.01575
DanjiangkouR	200901	0.001635	9.6125	1.94	9	8.09	2.75	0.09575	1.16075	0.02825
DanjiangkouR	200902	0.001885	9.3425	2.19	8.5	8.215	2	0.10775	1.17925	0.017
DanjiangkouR	200903	0.00125	10.125	1.6725	8.75	8.21	1.25	0.08425	1.15825	0.014
DanjiangkouR	200904	0.001635	9.3875	2.0575	13.75	8.3225	2.1875	0.10775	1.1875	0.0065
DanjiangkouR	200905	0.001885	9.95	1.9825	20.5	8.345	1.805	0.158	1.06675	0.00875
DanjiangkouR	200906	0.00209	8.98	2.12	21.5	8.3075	2.13	0.2215	1.15075	0.01125
DanjiangkouR	200907	0.00907	9.2025	2.1325	28	8.2675	2	0.12125	1.08925	0.01625
DanjiangkouR	200908	0.0013725	8.645	2.12	27.75	8.3075	2.15	0.07525	1.09825	0.01475
DanjiangkouR	200909	0.001165	10.45	1.6325	25.25	8.355	2.25	0.086	0.99625	0.0095
DanjiangkouR	200910	0.00119	7.2025	1.855	22	8.165	2	0.0975	1.13175	0.01575
DanjiangkouR	200911	0.0010275	7.435	2.0525	18.25	8.0525	2.0325	0.0835	1.12175	0.013
DanjiangkouR	200912	0.0091	8.175	1.9125	11.5	8.15	2	0.11825	1.10325	0.01525
DanjiangkouR	201001	0.0091	9.5125	1.8975	8.25	8.25	1.25	0.086875	1.1525	0.014
DanjiangkouR	201002	0.00935	9.88	2.2875	8.25	8.2025	2.035	0.093125	1.17425	0.01225
DanjiangkouR	201003	0.001135	10.53	1.88	12.5	8.2475	2	0.1205	1.18425	0.015
DanjiangkouR	201004	0.0012025	10.1675	1.8725	12	8.1775	2	0.09475	1.33	0.01
DanjiangkouR	201005	0.00184	8.835	1.9275	24.75	8.22	2	0.09375	1.205	0.01275
DanjiangkouR	201006	0.00209	9.0925	1.7775	21.25	8.205	2	0.106625	1.215	0.0125
DanjiangkouR	201007	0.002365	9.425	1.945	30	8.3275	2	0.088125	1.0675	0.0165
DanjiangkouR	201008	0.0020475	8.6725	2.95	30	8.3525	2.1575	0.104875	2.1325	0.023
DanjiangkouR	201009	0.001635	9.67	2.6475	26.5	8.3325	2.05	0.16875	1.295	0.025
DanjiangkouR	201010	0.00184	8.705	2.935	23	8.3075	2.0625	0.12825	1.23075	0.0215
DanjiangkouR	201011	0.00184	8.7975	2.705	21.75	8.35	2.18	0.120625	1.23325	0.024
DanjiangkouR	201012	0.0019525	8.12	2.22	17	8.375	2.045	0.135	1.24	0.021
DanjiangkouR	201101	0.0017025	9.255	2.14		8.1825	2.03	0.113125	1.295	0.0125
DanjiangkouR	201102	0.001635	10.28	2.0475		8.305	2	0.105625	1.3425	0.01275
DanjiangkouR	201103	0.001635	10.42	1.9725		8.2175	2.05	0.103125	1.335	0.01175
DanjiangkouR	201104	0.001635	10.615	2.2175		8.2775	2.1	0.1075	1.3475	0.01175
DanjiangkouR	201105	0.001385	8.2675	1.9425		8.325	2	0.1455	1.34575	0.013
DanjiangkouR	201106	0.00184	7.5	1.9025		8.44	2.0575	0.140625	1.345	0.0165
DanjiangkouR	201107	0.00184	7.53	1.9975		8.38	2	0.155	1.375	0.01625
DanjiangkouR	201108	0.0020475	7.045	2.43		8.07	2	0.1525	1.51	0.01875
DanjiangkouR	201109	0.001635	8.0325	2.4075		8.24	2	0.1325	1.4175	0.019
DanjiangkouR	201110	0.001385	8.3175	2.07		8.28	2	0.17625	1.5125	0.0155
DanjiangkouR	201111	0.0015	8.445	2.1225		8.2025	2	0.1475	1.4125	0.0155
DanjiangkouR	201112	0.0015675	8.265	1.85		8.085	1.25	0.126	1.4075	0.01825
DanjiangkouR	201201	0.0013475	9.2325	1.925	4.75	8.135	1.25	0.153333	1.4625	0.01425
DanjiangkouR	201202	0.0014325	9.905	1.8675	7	8.3425	1.25	0.15475	1.4375	0.015
DanjiangkouR	201203	0.0014325	9.605	1.885	7	8.055	1.25	0.196667	1.62	0.01725
DanjiangkouR	201204	0.0014325	9.78	1.93	11.5	8.325	1.25	0.15825	1.5775	0.0115
DanjiangkouR	201205	0.0011825	8.23	1.9075	20.5	8.4625	1.25	0.147	1.51925	0.01
DanjiangkouR	201206	0.0013875	8.2675	2.105	22.25	8.43	1.4175	0.1215	1.2025	0.013
DanjiangkouR	201207	0.0014775	8.28	1.9475	24.25	8.33	1.25	0.1185	1.5175	0.0125
DanjiangkouR	201208	0.001365	7.525	2.155	30	8.4125	1.285	0.1105	1.5375	0.0115
DanjiangkouR	201209	0.0014325	7.6825	2.0225	26.25	8.125	1.25	0.11775	1.575	0.01825
DanjiangkouR	201210	0.0011825	8.13	2.3625	22.75	8.2675	1.355	0.12425	1.37175	0.02
DanjiangkouR	201211	0.0013875	8.805	1.9225	19.25	8.2275	1.25	0.11525	1.36675	0.018
DanjiangkouR	201212	0.0012275	9.69	2.455	14.2	8.0025	1.29	0.116	1.38575	0.0145
DanjiangkouR	201401	0.00115908	9.18	2.17	10.5	8.0825	1.335	0.11625	1.26575	0.01775
DanjiangkouR	201402	0.00120458	10.5225	1.735	7.75	7.91	1.25	0.12175	1.33675	0.0155
DanjiangkouR	201403	0.00124975	9.8	1.7675	9.5	8.1625	1.25	0.115	1.30425	0.0165
DanjiangkouR	201404	0.00120458	9.3675	1.7675	16.625	8.17	1.25	0.11825	1.35425	0.013
DanjiangkouR	201405	0.00122717	8.7275	1.7075	20.05	7.9625	1.25	0.11925	1.35175	0.0125
DanjiangkouR	201406	0.00161242	8.2675	1.69	24.175	8.1075	1.25	0.14125	1.34175	0.0145
DanjiangkouR	201407	0.00115942	8.35	1.7725	27.05	8.15	1.25	0.14	1.25325	0.0105
DanjiangkouR	201408	0.00127233	8.795	2.145	32	7.9525	1.295	0.13175	1.35075	0.01375
DanjiangkouR	201409	0.00147717	7.1375	1.94	26.75	8.205	1.3	0.09125	1.37175	0.015
DanjiangkouR	201410	0.00122717	8.725	2.18	23.35	7.95	1.25	0.1085	1.32175	0.022
DanjiangkouR	201411	0.00120458	7.085	2.0775	19.075	7.705	1.275	0.117	1.335	0.02075
DanjiangkouR	201412	0.00111425	7.52	2.03	15.75	7.6675	1.29	0.18275	1.32325	0.01475
DanjiangkouR	201501	0.0011825	8.785	1.8875	13	7.905	1.25	0.078675	1.22825	0.02175
DanjiangkouR	201502	0.0011375	9.3075	2.2375	9.5	7.795	1.4625	0.103325	1.20575	0.01675
DanjiangkouR	201503	0.0012045	9.455	2.18	9.725	7.7725	1.4575	0.1815	1.22825	0.0135
DanjiangkouR	201504	0.00124975	9.85	2.16	12	7.7125	1.4075	0.07125	1.32425	0.01725
DanjiangkouR	201505	0.00127225	8.7325	2.1525	19.25	8.265	1.4425	0.106825	1.3825	0.01775
DanjiangkouR	201506	0.00124975	9.205	2.26	23.775	8.4	1.495	0.12725	1.395	0.0135
DanjiangkouR	201507	0.00127225	8.38	2.065	25.75	8.2325	1.29	0.057675	1.25425	0.0165
DanjiangkouR	201508	0.00124975	9.225	2.0925	31.025	8.03	1.285	0.07425	1.28325	0.018
DanjiangkouR	201509	0.0012825	8.4125	2.5125	28.975	7.8975	1.4425	0.095	1.2625	0.017
DanjiangkouR	201510	0.0014545	7.2925	1.94	24.075	7.965	1.25	0.063825	1.25425	0.01875
DanjiangkouR	201511	0.001182	7.225	2.23	20.45	8.0225	1.455	0.104575	1.17325	0.0205
DanjiangkouR	201512	0.00127225	8.2275	2.12	15.525	7.9825	1.4225	0.076075	1.15	0.0155
DanjiangkouR	201601	0.0012045	8.35	2.2425	11.65	7.825	1.43	0.066	1.2275	0.01925
DanjiangkouR	201602	0.00113675	9.95	2.145	9.25	8.025	1.4725	0.08625	1.2975	0.02075
DanjiangkouR	201603	0.001182	11.1	2.2025	9.475	8.05	1.3625	0.0455	1.305	0.01775
DanjiangkouR	201604	0.00147725	10	2.3975	14.05	8.075	1.44	0.056	1.3275	0.01975
DanjiangkouR	201605	0.0048675	8.925	2.3325	20.625	8.3	1.465	0.0635	1.235	0.016
DanjiangkouR	201606	0.0050925	8.4	2.27	22.875	8.175	1.4675	0.10125	1.22	0.01825
DanjiangkouR	201607	0.00138675	8.7275	2.3825	26.95	8.105	1.455	0.05325	1.1375	0.01575
DanjiangkouR	201608	0.00083625	9.5075	2.435	32.35	8.2475	1.42	0.0575	1.1175	0.015
DanjiangkouR	201609	0.001295	7.51	2.37	29.025	8	1.4325	0.0445	1.09	0.017
DanjiangkouR	201610	0.00127225	6.4975	2.205	24.675	7.88	1.3625	0.09075	1.025	0.014
DanjiangkouR	201611	0.0011945	7.51	2.24	20.2	8.1475	1.435	0.06025	1.1075	0.01675
DanjiangkouR	201612	0.00124825	8.5325	2.2075	15.175	7.8525	1.425	0.07375	1.2025	0.01525
Dianchi	200701	0.0641111	5.96667	10.6444	10.4222	8.39556	4.26667	0.408714	6.01889	0.531111
Dianchi	200702	0.0355556	4.91111	7.4	9.22222	7.85	5.74444	3.92111	7.13111	0.571444
Dianchi	200704	0.0511111	6.98444	12.3778	16.4444	6.51444	2.88889	3.578	4.37125	0.598
Dianchi	200705	0.0451111	8.16333	13.5222	20.7444	8.31889	3.72222	3.56711	6.30667	0.508333
Dianchi	200706	0.0498889	5.42444	12.3	23.2	6.89889	3.43333	3.02133	5.51222	0.463111
Dianchi	200707	0.0621111	7.70333	11.6444	24.2222	8.56889	5.48889	2.87933	5.14333	0.667111
Dianchi	200708	0.0611111	7.32778	14.8556	21.2222	8.57333	2.16667	1.95744	5.20333	0.193111
Dianchi	200709	0.207	6.41222	9.81111	21.8444	8.62444	2.84444	0.963667	4.61556	0.299333
Dianchi	200710	0.0671111	8.13333	8.5	20.5889	8.71667	2.34444	1.80478	4.33	0.258667
Dianchi	200711	0.083	6.20444	5.63333	16.2444	8.65667	2.56667	2.05944	5.61	0.284
Dianchi	200712	0.083	5.88444	9.86667	12.7444	8.74556	4.01111	2.89189	6.42444	0.358667
Dianchi	200801	0.0548889	6.12	9.35556	10.9667	8.45111	4.28889	3.10967	6.40556	0.454
Dianchi	200802	0.0196667	6.80667	8.98889	11.7889	8.07111	3.98889	3.50711	6.63111	0.282333
Dianchi	200803	0.0286667	7.66667	5.83333	11.3556	8.41333	2.81111	3.84589	6.89889	0.409556
Dianchi	200804	0.0563333	7.59778	8.45556	16.5667	8.73778	3.85556	2.69456	6.36333	0.486111
Dianchi	200805	0.0425556	6.40889	8.17778	18.8111	8.73444	6.45556	3.08633	5.06333	0.466556
Dianchi	200806	0.063	5.63667	12.5667	20.0556	8.71778	4.13333	2.669	5.04333	0.424111
Dianchi	200807	0.0656667	7.03667	7.98889	22.2333	8.86444	5.7	2.656	4.58222	0.399333
Dianchi	200808	0.06	7.02111	8.85556	22.4778	9.05556	6.77778	2.23922	3.72667	0.255
Dianchi	200809	0.0765556	7.05222	15.9778	21.5667	8.82111	5.44444	1.67489	4.47	0.272
Dianchi	200810	0.0665556	6.84778	10.8556	20.3444	8.89778	5.48889	2.48911	4.61889	0.294444
Dianchi	200811	0.130889	5.13778	9.24444	17.4444	9.30556	5.56667	2.745	4.85444	0.360222
Dianchi	200812	0.0986667	6.91556	12.9222	13.7889	9.15222	3.26667	3.32622	5.2	0.394222
Dianchi	200901	0.0665556	7.49333	9.24444	11.9556	9.09778	5.18889	3.39011	5.79667	0.464889
Dianchi	200902	0.0591111	7.17333	9.88889	11.8889	8.70889	6.08889	3.85278	5.99778	0.477111
Dianchi	200903	0.0637778	7.47111	12.4333	14.7778	9.18333	6.54444	4.04878	6.80889	0.461
Dianchi	200904	0.0624444	5.94778	15.1	16.7556	8.50333	4.95556	3.691	6.47	0.303556
Dianchi	200905	0.06	6.03	13.1889	19.4444	8.53889	6.18889	3.94689	6.04556	0.608889
Dianchi	200906	0.0694444	4.7	12.0889	19.7222	8.39111	4.96667	3.30033	5.10667	0.572889
Dianchi	200907	0.0807778	6.16111	12.3222	20.7	8.49222	7.2	2.04033	4.83778	0.408556
Dianchi	200908	0.119667	6.53222	12.4444	25.5111	9.40111	6.56667	1.889	3.86222	0.369444
Dianchi	200909	0.153889	7.64444	9.07778	22.9889	9.61778	5.66667	2.32289	3.71778	0.26
Dianchi	200910	0.159889	7.04556	10.0556	20.6222	9.51778	4.86667	2.73378	4.88444	0.397333
Dianchi	200911	0.089	6.39556	14.6778	17.0111	9.39222	5.65556	2.97844	4.61778	0.434778
Dianchi	200912	0.0442222	6.81111	11.6333	13.3	8.57	3.07778	3.43678	6.52778	0.509556
Dianchi	201001	0.0381111	6.68111	8.87778	11.2889	8.73	4.22222	2.71178	5.52667	0.422222
Dianchi	201002	0.0424444	7.27222	8.35556	12.6444	8.68444	5.78889	1.998	5.17	0.408667
Dianchi	201003	0.0706667	6.44556	7.64444	14.0333	8.24222	6.95556	1.87722	6.18778	0.363667
Dianchi	201004	0.0793333	7.56	6.83333	15.7444	8.50556	6.14444	2.97933	6.01667	0.426
Dianchi	201005	0.115111	7.50778	10.8556	19.4111	8.82444	6.42222	1.54822	4.64222	0.336667
Dianchi	201006	0.100667	5.16222	14.1556	22.0889	8.88444	4.35556	1.94033	4.76556	0.266
Dianchi	201007	0.106667	5.74889	10.4667	22.4333	8.89	5.76667	1.86667	4.22333	0.303
Dianchi	201008	0.098	6.74778	12.3667	22.6333	9.05556	4.35556	1.32022	3.61444	0.217778
Dianchi	201009	0.0882222	8.45778	11.5556	22.9333	9.40333	4.37778	0.663111	3.02667	0.157444
Dianchi	201010	0.0697778	4.78333	10.9333	18.5889	8.83889	3.98889	0.825333	3.43556	0.176444
Dianchi	201011	0.110556	6.60111	10.8	16.1444	9.22444	7.03333	1.10022	3.16444	0.212111
Dianchi	201012	0.115	6.1	11.3556	14.4667	9.02444	5.77778	0.510333	4.28889	0.196333
Dianchi	201101	0.0738889	8.15667	6.94444		8.43444	6.94444	0.703	4.23889	0.198111
Dianchi	201102	0.038	7.07444	12.9778		8.46778	3.94444	0.259	3.85889	0.146222
Dianchi	201103	0.0526667	6.74111	12.9556		8.25778	4.98889	0.493333	4.04778	0.155667
Dianchi	201104	0.058	7.37	7.67778		8.56889	4.87778	0.872889	4.4	0.131778
Dianchi	201105	0.0866667	6.58333	11.4889		9.04111	3.75556	1.32556	3.83222	0.154667
Dianchi	201106	0.0678889	5.68778	10.5111		9.05778	5.23333	0.661	3.32222	0.205889
Dianchi	201107	0.125333	6.26444	12.6556		9.00556	5.73333	0.652333	3.17444	0.245222
Dianchi	201108	0.125333	6.28667	9.4		9.00111	5.67778	0.265111	3.81	0.213444
Dianchi	201109	0.0978889	7.88	8.81111		9.45556	5.36667	0.361667	2.50667	0.174111
Dianchi	201110	0.0793333	6.89889	11.7333		8.63667	4.74444	0.363778	2.61889	0.168
Dianchi	201111	0.0834444	6.26333	8.22222		8.26444	3.55556	0.243778	3.29778	0.192556
Dianchi	201112	0.0674444	6.56778	13.1889		8.51	2.64444	0.351778	3.39778	0.160333
Dianchi	201201	0.0498889	6.12556	13.3778	11.5444	8.69222	3.02222	0.344444	3.49111	0.176444
Dianchi	201202	0.0808889	6.17333	10.3889	11.9222	8.73889	3.54444	0.274222	3.99778	0.174
Dianchi	201203	0.0722222	6.32222	10.9111	13.7667	8.41667	3.64444	0.477	3.47	0.221
Dianchi	201204	0.0833333	7.36778	10.0444	17.8	8.79889	4.3	0.383556	2.33556	0.172444
Dianchi	201205	0.118667	7.74	11.2778	20.4778	8.91333	4.95556	0.441667	2.40556	0.176778
Dianchi	201206	0.0951111	5.51889	10.4778	22.4111	8.61111	5.01111	1.02389	2.72	0.218111
Dianchi	201207	0.100889	5.61444	8.7	22.9556	8.78556	4.4	0.777222	2.43	0.165444
Dianchi	201208	0.103333	7.23333	11.8778	23.2333	8.69333	7.8	1.13533	2.86667	0.178778
Dianchi	201209	0.126222	8.00556	9.97778	23.2667	8.63333	7.1	1.00389	3.83	0.186667
Dianchi	201210	0.129667	6.97333	11.5	19.4889	8.56444	6.91111	0.669778	3.13222	0.166889
Dianchi	201211	0.120444	6.27556	11.6444	18.5222	8.69111	5.42222	0.634111	2.11333	0.177778
Dianchi	201212	0.0391111	6.59667	8	16.4778	9.03556	4.96667	0.576444	2.33778	0.127556
Dianchi	201401	0.0561111	8.06556	8.02222	11.4889	8.55111	4.46667	0.702444	2.71333	0.112222
Dianchi	201402	0.0344444	6.38111	6.36667	13.7889	8.55556	3.18889	1.48522	3.34444	0.119667
Dianchi	201403	0.0555556	7.01444	14.8	14.8111	8.62	4.71111	1.01233	3.23889	0.174667
Dianchi	201404	0.036	7.53444	7.04444	16.8556	8.31556	3.22222	0.777222	2.40889	0.135444
Dianchi	201405	0.0852222	6.57333	8.75556	18.3667	8.72444	4.74444	0.504667	1.99111	0.164444
Dianchi	201406	0.177444	6.50444	11.0778	24.6889	8.80889	5.46667	0.312889	2	0.165333
Dianchi	201407	0.128556	6.40889	11.5111	24.1556	8.68667	5.95556	0.638222	2.58444	0.195667
Dianchi	201408	0.161111	6.95333	11.8556	24.9444	8.65333	7.82222	0.536444	2.04333	0.182444
Dianchi	201409	0.107889	7.79444	11.9333	23.4222	8.69667	7.68889	0.443222	1.92333	0.167444
Dianchi	201410	0.0706667	8.34778	6.87778	20.3444	8.72444	5.62222	0.332222	2.29667	0.141444
Dianchi	201411	0.0513333	8.35444	9.82222	19.8667	8.49111	3.68889	0.291667	2.19444	0.157
Dianchi	201412	0.0486667	7.87111	8.45556	15.5	8.74444	2.26667	0.185444	2.24889	0.110111
Dianchi	201501	0.0682222	7.16	6.71111	10.0667	8.65222	4.34444	0.273	2.56333	0.126
Dianchi	201502	0.0488889	7.51778	6	13.0333	8.47222	3.53333	0.792333	2.47333	0.0712222
Dianchi	201503	0.0676667	8.22444	5.51111	15.5444	8.46444	3.66667	0.283889	2.97444	0.0905556
Dianchi	201504	0.0595556	6.90444	9.97778	16.9889	7.99889	4.91111	0.394333	2.28778	0.174
Dianchi	201505	0.0731111	8.01	8.7	18.2667	8.56556	4.83333	0.326222	2.94111	0.111778
Dianchi	201506	0.0597778	7.48889	8.87778	21.7778	8.51889	4	0.298222	1.52	0.140333
Dianchi	201507	0.0623333	5.56	9.3	23.3	8.74222	4.05556	0.549889	2.64	0.155111
Dianchi	201508	0.0555556	6.80222	9.51111	20.8889	8.81444	4.43333	0.449778	2.39222	0.134222
Dianchi	201509	0.0767778	7.83778	4.96667	20.3	8.64111	5.31111	0.479111	2.34667	0.0997778
Dianchi	201510	0.082	8.18778	5.21111	18.3222	8.70444	3.18889	0.525444	2.13667	0.134444
Dianchi	201511	0.0756667	8.23333	8.56667	14.4333	8.55222	4.37778	0.442333	2.45778	0.126556
Dianchi	201512	0.0507778	6.64667	9.52222	17.7667	8.56444	4.42222	0.253444	1.84111	0.117556
Dianchi	201601	0.0305556	8.22222	4.66667	15.3778	8.77778	4.5	0.194556	1.82222	0.111667
Dianchi	201602	0.0302222	6.6	6.16667	9.23333	8.75556	3.95556	0.309889	1.94778	0.102667
Dianchi	201603	0.0206667	7.05556	4.73333	15.9	8.65556	3.57778	0.424222	1.97	0.0784444
Dianchi	201604	0.0324444	6.41111	4.68889	19.0667	8.32222	4.56667	0.795556	2.49444	0.101667
Dianchi	201605	0.0858889	6.43333	4.4	19.1333	8.82222	5.15556	0.18	1.82778	0.0755556
Dianchi	201606	0.0721111	8.42222	5.01111	22.7889	8.74444	5.11111	0.241778	2.18	0.0604444
Dianchi	201607	0.113778	8.39222	6.03333	23.2556	9.04778	5.7	0.322444	1.75889	0.129667
Dianchi	201608	0.159111	8.39556	5.62222	21.4111	9.05333	5.35556	0.210111	1.23444	0.158778
Dianchi	201609	0.0968889	8.46667	4.32222	20.7222	9.24111	4.82222	0.380667	2.28333	0.133667
Dianchi	201610	0.0737778	8.61778	4.67778	21.7667	8.44667	3.56667	0.218111	2.11222	0.0775556
Dianchi	201611	0.0482222	8.18667	4.15556	19.0667	8.32444	3.11111	0.184889	1.89444	0.102333
Dianchi	201612	0.0656667	8.68667	6.88889	14.9778	8.52889	5	0.287	2.55111	0.0917778
DongtingL	200701	0.00138833	10.5833	3.94	6.75	7.75417	1.61667	0.510833	1.54667	0.0733333
DongtingL	200702	0.00211667	10.65	2.92667	11	7.8575	1.745	0.455833	1.51083	0.0508333
DongtingL	200703	0.0016375	9.55167	2.73333	10.5	7.4675	1.06333	0.29	1.26167	0.065
DongtingL	200704	0.0007725	8.89	2.97333	14.75	7.67667	0.806667	0.3025	1.405	0.1175
DongtingL	200705	0.00148083	7.7	2.25667	14.75	7.64833	0.908333	0.249167	1.215	0.0825
DongtingL	200706	0.000705833	6.18	2.62333	24.875	7.67333	0.646667	0.278333	1.18667	0.0766667
DongtingL	200707	0.00129833	6.80667	2.26	28.875	7.60083	0.621667	0.299167	1.18083	0.0666667
DongtingL	200708	0.00234583	6.61	2.72667	26.5	7.725	0.876667	0.26	1.1225	0.0825
DongtingL	200709	0.00113833	6.76	2.25333	26.25	7.61083	0.54	0.215833	0.989167	0.113333
DongtingL	200710	0.000500833	7.80167	2.4	21.75	7.69833	0.915	0.273333	1.1275	0.0658333
DongtingL	200711	0.00145667	8.55333	2.59833	16.5	7.7575	0.9525	0.275833	1.22833	0.0975
DongtingL	200712	0.00443222	10.0067	2.35556	12	8.09	1.88222	0.386667	1.28778	0.0855556
DongtingL	200801	0.001375	10.5167	2.72	18	7.81	1.60333	0.26	1.15	0.168333
DongtingL	200802	0.00279083	11.89	2.635	15.5	7.87583	2.2875	0.318333	1.58917	0.25175
DongtingL	200803	0.00334417	10.5583	1.53333	15.75	7.8075	1.73833	0.280833	1.37667	0.1925
DongtingL	200804	0.00170111	8.52333	3.23	18	7.9775	1.25	0.333333	0.943333	0.0991667
DongtingL	200805	0.00168417	7.94167	2.70667	21.75	7.9525	1.71833	0.285833	1.185	0.110833
DongtingL	200806	0.000840833	6.33833	2.67333	25	7.83583	0.893333	0.379167	1.16833	0.161667
DongtingL	200807	0.00122833	6.44	2.95333	28.75	7.6925	0.43	0.32	1.07833	0.0766667
DongtingL	200808	0.00161417	6.23333	3.06667	29.75	7.9275	0.75	0.3625	0.998333	0.0883333
DongtingL	200809	0.00177417	6.62667	2.67333	26.5	7.7875	1.43667	0.295833	1.0675	0.09
DongtingL	200810	0.00132	7.625	2.89333	21.5	7.8	1.35	0.259167	1.04833	0.119167
DongtingL	200811	0.000568333	7.83667	3.55833	19.5	7.7825	2.275	0.2625	0.999167	0.160833
DongtingL	200812	0.00192	7.5975	2.39583	14.5	8.33833	1.3375	0.165083	0.6975	0.113333
DongtingL	200901	0.00409583	9.30417	2.08167	8.375	8.5775	1.49083	0.432833	1.04417	0.1005
DongtingL	200902	0.00327167	10.1167	1.72667	8.575	8.0375	1.35833	0.201083	1.105	0.0748333
DongtingL	200903	0.004455	8.74167	2.17333	7.875	7.69417	1.74167	0.539167	2.1425	0.19475
DongtingL	200904	0.002085	8.22583	1.95083	13.5	7.9125	1.56	0.3905	1.6725	0.0893333
DongtingL	200905	0.00471083	7.2375	2.04333	21.625	7.81667	1.625	0.135333	1.735	0.0879167
DongtingL	200906	0.00206417	6.10417	2.01167	22.5	7.88833	1.22917	0.300917	1.76333	0.0926667
DongtingL	200907	0.00178	5.65833	1.92917	27.4	7.78167	1.7375	0.274583	1.62583	0.0790833
DongtingL	200908	0.00178	5.65833	1.92917	27.4	7.78167	1.7375	0.274583	1.62583	0.0790833
DongtingL	200909	0.00289417	5.75	1.8175	27.75	7.87083	1.575	0.223	1.26667	0.101417
DongtingL	200910	0.00558083	6.46667	2.04833	23.125	7.75917	1.20833	0.143083	1.8525	0.1055
DongtingL	200911	0.011585	8.42	1.86167	20.5	7.55	1.08167	0.250083	1.39833	0.1155
DongtingL	200912	0.00515083	9.50417	1.87833		7.73333	1.51667	0.241333	1.78667	0.0951667
DongtingL	201001	0.00613917	10.0375	1.945	10	7.78417	1.85833	1.27667	1.88417	0.104583
DongtingL	201002	0.00974	9.3825	1.92833	9	7.79333	2.35333	1.09325	2.58167	0.0914167
DongtingL	201003	0.0048275	8.76833	2.20833	10.375	7.42833	1.38417	0.2915	1.97833	0.084
DongtingL	201004	0.00420333	8.04667	2.14833	11.125	7.67167	1.37	0.489667	2.50167	0.0588333
DongtingL	201005	0.0085275	7.45667	1.965	23.25	7.70083	2.05167	0.17525	2.17083	0.0715833
DongtingL	201006	0.00643667	6.28083	2.17333	23.625	7.78417	1.75333	0.11075	1.84917	0.0601667
DongtingL	201007	0.0104492	5.25083	2.43833	25.625	7.45417	1.79083	0.09875	1.83167	0.10525
DongtingL	201008	0.00698583	6.79417	2.34833	26.5	7.58583	4.30167	0.143583	1.90167	0.0621667
DongtingL	201009	0.008265	6.08333	2.15917	25.125	7.80167	2.46917	0.163417	1.66083	0.0774167
DongtingL	201010	0.0024175	5.36	2.36583	22.75	7.80917	1.03833	0.25625	1.82333	0.105417
DongtingL	201011	0.00391	6.11	1.89833	19.875	7.88417	1.065	0.259333	1.945	0.0999167
DongtingL	201012	0.00501167	7.0475	1.975	15.75	8.08	1.02083	0.127917	2.365	0.0808333
DongtingL	201101	0.00243	8.78417	1.99833		7.78917	0.9025	0.674	1.4475	0.09425
DongtingL	201102	0.0042775	8.405	1.91833		7.79333	1.10917	0.187083	1.44667	0.0915833
DongtingL	201103	0.00396167	8.185	1.82083		8.27	0.978333	0.495583	1.8525	0.117417
DongtingL	201104	0.00297167	8.5875	2.18833		8.045	1.89167	0.199917	1.3375	0.0805833
DongtingL	201105	0.0059325	5.73	2.14167		8.005	1.69667	0.163833	2.02667	0.0941667
DongtingL	201106	0.0019625	5.04083	1.88833		7.745	2.72583	0.354167	2.06583	0.08625
DongtingL	201107	0.0040325	5.7375	1.96167		7.295	1.94167	0.114167	2.09917	0.0614167
DongtingL	201108	0.00311417	6.1125	2.25167		7.59917	1.6125	0.130417	1.88833	0.07875
DongtingL	201109	0.00367083	6.41667	2.33833		7.71417	2.375	0.214667	1.81333	0.0656667
DongtingL	201110	0.0027225	6.32917	1.965		7.425	1.64083	0.0660833	1.475	0.08575
DongtingL	201111	0.00312167	6.88917	1.92		7.48083	1.63917	0.17975	1.90417	0.0615
DongtingL	201112	0.00206167	8.82917	1.45667		7.76833	1.275	0.109	1.73	0.0630833
DongtingL	201201	0.0028775	10.375	1.5975	10	7.77	2.0275	0.431	1.8625	0.07475
DongtingL	201202	0.0032075	11.05	2.35	5	7.655	1.8725	0.191	1.6125	0.082
DongtingL	201203	0.0023	10.08	2.2575	7.75	7.63	1.75	0.33525	2.089	0.07025
DongtingL	201204	0.002055	8.1075	1.9125	15.6	7.8125	1.3875	0.5395	2.2275	0.07975
DongtingL	201205	0.00237	7.1375	1.96	20.775	7.6625	1.4225	0.09175	1.98725	0.0715
DongtingL	201206	0.00336	6.325	1.69	23.625	7.55	1.99	0.09	1.901	0.059
DongtingL	201207	0.00329	5.895	2.1425	30.375	7.48	2.2925	0.0525	1.6285	0.07725
DongtingL	201208	0.0021875	6.435	1.8075	32.75	7.895	2	0.05675	1.6925	0.07125
DongtingL	201209	0.002175	6.35	1.715	28	7.37	2.045	0.11425	1.5025	0.092
DongtingL	201210	0.0028075	7.025	1.63	22.425	7.8775	1	0.03975	1.48825	0.08225
DongtingL	201211	0.0010175	7.71	1.6175	19.5	7.5125	1.3825	0.116	1.534	0.08125
DongtingL	201212	0.003555	8.2	1.5975	12.45	7.48	1	0.183	2.00825	0.07025
DongtingL	201401	0.0012575	9.8675	2.0325	6.95	8.0525	1.25	0.45275	2.24075	0.074
DongtingL	201402	0.00062	10.185	1.71	5.425	8.08	1.0825	0.3235	2.169	0.0565
DongtingL	201403	0.00160168	10.4575	2.635	7.175	7.74	1.7475	0.29575	2.42075	0.1025
DongtingL	201404	0.0013975	8.1575	2.0825	18.125	7.7075	2	0.16925	1.79225	0.04725
DongtingL	201405	0.000683325	7.6225	2.4575	21.5	7.8225	1.75	0.1225	1.855	0.0785
DongtingL	201406	0.00176085	6.1325	2.5	24.925	7.6175	1.1675	0.0965	1.84925	0.0575
DongtingL	201407	0.00179332	5.2675	2.715	19.95	7.765	1	0.14425	2.14425	0.069
DongtingL	201408	0.00422	7.225	2.4425	29.1	6.6525	2.03	0.10425	1.68075	0.11825
DongtingL	201409	0.001875	6.0325	2.495	26.85	7.7575	1.4675	0.0805	1.65575	0.13525
DongtingL	201410	0.00107085	7.2675	2.6675	24.225	7.9375	2.0675	0.071	1.77175	0.105
DongtingL	201411	0.00124168	7.8325	2.75	19.025	7.835	2.2825	0.16875	2.121	0.1085
DongtingL	201412	0.00082	9.15	1.7925	13	7.9775	2.5425	0.2395	2.134	0.09575
DongtingL	201501	0.001995	10.275	1.565	11.25	8.2725	3.575	0.35675	2.385	0.06675
DongtingL	201502	0.00173917	10.5325	1.6075	7.55	8.305	2.065	0.397	2.269	0.08175
DongtingL	201503	0.00331168	10.12	1.7775	10.325	8.0825	1.35	0.4475	2.13075	0.12175
DongtingL	201504	0.00237833	8.7925	2.025	16.775	8.0425	2.8675	0.29275	2.17175	0.12425
DongtingL	201505	0.00239753	7.35	2.1825	22	8.1025	1.175	0.2735	2.0515	0.12325
DongtingL	201506	0.001835	6.49	1.5925	23.15	7.8275	1.7575	0.27525	2.25425	0.1085
DongtingL	201507	0.00249	6.8	1.655	25.175	7.9175	1.635	0.1825	1.93	0.09825
DongtingL	201508	0.00139003	6.8825	2.25	29.725	8.1425	1.6075	0.50725	1.944	0.101
DongtingL	201509	0.00141415	7.27	1.5725	26.225	8.4025	1.2675	0.0445	1.60825	0.09575
DongtingL	201510	0.0032775	7.235	1.3225	23.025	8.375	1.1075	0.104	1.61675	0.11175
DongtingL	201511	0.00136835	8.4275	1.29	18.8	8.43	1.6325	0.2045	1.72675	0.12875
DongtingL	201512	0.00210247	9.4075	1.3675	13.45	8.475	2.4925	0.21125	1.65675	0.092
DongtingL	201601	0.001554	10.375	1.375	10.45	8.475	2.425	0.19275	1.89925	0.07425
DongtingL	201602	0.00133	11.6	1.3675	7.95	7.775	2.115	0.18725	1.705	0.0755
DongtingL	201603	0.00824075	10.925	1.175	14.625	8.45	2.4925	0.15125	1.456	0.06475
DongtingL	201604	0.0029975	8.475	1.8	16.25	7.25	2.59	0.28725	2.0785	0.0855
DongtingL	201605	0.00196825	7.65	1.7725	20.35	7.35	2.4225	0.098	1.69575	0.06325
DongtingL	201606	0.00329175	7.475	1.7675	23	7.3	2.09	0.15175	2.06825	0.08625
DongtingL	201607	0.00259165	6.4175	2.22	25.325	6.9975	2.31	0.20925	2.07	0.09825
DongtingL	201608	0.00427082	5.9075	1.91	24.875	6.925	2.135	0.073	1.7375	0.07775
DongtingL	201609	0.00470082	6.615	1.775	23.9	7.68	2.01	0.12225	1.59	0.08325
DongtingL	201610	0.00291228	7.44	1.8575	19.1	7.885	1.75	0.0895	1.435	0.08125
DongtingL	201611	0.0017833	8.2775	1.9925	17.9	7.6975	1.19	0.19925	2.135	0.0785
DongtingL	201612	0.00221265	9.05	1.8825	13.35	7.6825	1.6	0.40875	2.2715	0.077
PoyangL	200704	0.003975	7.8025	2.83	19.75	7.5575	1.2425	0.2215	0.7975	0.04
PoyangL	200708	0.0042	7.67	3.2925	32.75	7.52	1.6425	0.23775	0.69	0.0475
PoyangL	200712	0.003325	8.8025	2.72	13.5	7.5575	1.63	0.712	1.5925	0.0675
PoyangL	200803	0.005925	8.935	2.825	12.75	7.3925	1.4975	0.97675	1.4775	0.0875
PoyangL	200809	0.00495	8.2825	2.665	27.25	7.6325	1.625	0.13925	1.0875	0.0525
PoyangL	200811	0.00891	8.1075	3.1625	22.75	7.5825	1.79	0.71775	1.1935	0.085
PoyangL	200901	0.0058175	10	3.15	8.25	7.845	1.3975	0.55775	0.74225	0.0685
PoyangL	200903	0.00957	9.55	3.3275	10.75	7.735	1.825	0.63175	1.0425	0.095
PoyangL	200904	0.00903	9.045	3.3025	16.75	7.4775	2.3825	0.54	1.14	0.065
PoyangL	200905	0.0092525	8.2	2.55	20.5	7.76	1.55	0.3185	1.085	0.07
PoyangL	200906	0.008995	8.15	2.85	24	7.4675	1.5	0.289	0.9675	0.075
PoyangL	200907	0.007905	9.55	2.925	25.625	7.395	1.575	0.55875	1.1325	0.135
PoyangL	200908	0.0059625	7.55	2.75	28.75	7.445	0.975	0.378	0.8925	0.0725
PoyangL	200909	0.00631	7.8	2.425	30	7.51	1.5	0.20725	1.065	0.08
PoyangL	200910	0.0077175	8.15	2.7	24	7.265	1.275	0.29425	0.7575	0.105
PoyangL	200911	0.0039125	8.475	3.125	16.75	7.4175	1.25	0.8605	1.5725	0.1425
PoyangL	200912	0.0031225	9.05	2.975	12.25	7.63	1.25	0.69575	1.3425	0.175
PoyangL	201001	0.0026025	8.6	3.05	7.25	7.7575	1.25	0.91675	1.6825	0.2625
PoyangL	201002	0.002755	8.8	2.875	9	7.8	1.25	0.9185	1.795	0.2075
PoyangL	201003	0.0043225	8.85	2.95	11	6.98	1.75	0.31525	0.9	0.075
PoyangL	201004	0.0034525	8.425	2.925	12.25	7.07	1.6	0.3105	1.0875	0.1625
PoyangL	201005	0.0065625	8.2	2.675	19.75	7.58	1.6	0.2065	0.8375	0.0725
PoyangL	201006	0.0047775	8.3	2.975	22.75	7.0775	1.8	0.10525	0.9425	0.0475
PoyangL	201007	0.00723	7.55	2.4	27.5	7.1325	1.6	0.12075	0.655	0.07
PoyangL	201008	0.0056975	7.2	2.675	32.25	7.0825	1.8	0.072	0.7275	0.4775
PoyangL	201009	0.0075225	7.575	2.875	24	7.005	1.3	0.1135	0.9625	0.0625
PoyangL	201010	0.0054525	7.225	2.975	18.25	6.995	2.55	0.3665	1.255	0.1775
PoyangL	201011	0.0056275	8.425	3.225	14.25	7.26	1.875	0.4095	1.0725	0.12
PoyangL	201012	0.0039325	8.6	3.375	14.25	7.3375	2.95	1.05075	1.6925	0.1275
PoyangL	201101	0.004395	9.5	3.25		7.255	1.695	0.65025	1.1	0.12
PoyangL	201102	0.007245	10.525	3.075		7.3025	1.975	0.80775	1.415	0.13
PoyangL	201103	0.00183	8.565	3.19		7.575	1.9325	0.5825	1.115	0.047
PoyangL	201104	0.0021125	9.155	3.2675		7.4275	3.315	0.88525	1.6425	0.056
PoyangL	201105	0.00377	7.7025	3.1475		7.535	2.005	0.28925	1.2575	0.06675
PoyangL	201106	0.0042525	7.97	3.6125		7.505	2.615	0.4025	1.0825	0.05975
PoyangL	201107	0.0077575	7.5	3.29		7.5925	2.6425	0.28625	0.73525	0.04075
PoyangL	201108	0.0047225	6.975	3.4		7.58	2.4475	0.28125	1.1125	0.03875
PoyangL	201109	0.0046575	7.0975	3.3725		7.6175	2.9625	0.5215	1.3825	0.0415
PoyangL	201110	0.0030975	7.3025	3.015		7.4925	2.5475	0.2995	1.5125	0.054
PoyangL	201111	0.00313	7.975	3.395		7.4475	2.695	0.345	1.078	0.05425
PoyangL	201112	0.004115	9.45	2.3525		7.525	2.3	0.44425	1.1175	0.04075
PoyangL	201201	0.0044	8.375	3.8925	9.475	7.5325	2.875	0.84025	1.5575	0.045
PoyangL	201202	0.00394	9.425	3.335	8.925	7.735	3.05	0.851	1.57	0.0425
PoyangL	201203	0.002279	7.875	2.8275	9.625	7.5475	2.055	0.635	1.2075	0.04575
PoyangL	201204	0.001395	8.6825	2.585	16	7.6575	2.31	0.3705	0.97525	0.0425
PoyangL	201205	0.0067975	6.8475	2.89	19.5	7.6575	2.5975	0.3035	1.5675	0.049
PoyangL	201206	0.005175	6.625	2.9525	23.75	7.6925	2.475	0.2095	0.93275	0.0435
PoyangL	201207	0.00307	6.28	2.2575	27	7.705	2.295	0.194	1.0375	0.04125
PoyangL	201208	0.0024	7.7075	3.2375	27.75	7.3525	1.7925	0.4335	1.15	0.05975
PoyangL	201209	0.00318	7.31	2.465	22.875	7.7375	2.4125	0.321	1.0125	0.03725
PoyangL	201210	0.008985	8.2	2.9	23.125	7.105	2	0.5885	1.186	0.085
PoyangL	201211	0.00361	7.7575	3.1225	19.5	7.655	2.6375	0.542	0.89	0.0455
PoyangL	201212	0.0049225	7.9225	2.7775	13.675	7.6475	2.02	0.48325	1.1775	0.051
PoyangL	201401	0.0029425	7.7675	2.6125	11.85	7.52	2.925	0.843	1.52	0.0435
PoyangL	201402	0.0027475	8.475	2.8775	7.525	7.3725	2.325	0.72625	2.265	0.042
PoyangL	201403	0.0021725	7.775	2.995	10.8	7.3575	2.5	0.69875	1.33	0.0395
PoyangL	201404	0.0020825	7.475	2.425	15.3	7.3125	2.35	0.27775	1.03	0.04225
PoyangL	201405	0.0026475	6.9	1.9675	21.95	7.3475	2.35	0.38825	1.1425	0.0415
PoyangL	201406	0.0023525	7.175	2.7625	24.825	7.3625	2.45	0.2465	1.24	0.04125
PoyangL	201407	0.0036175	7.235	2.7	26.125	7.365	2.1475	0.20025	0.9875	0.0465
PoyangL	201408	0.0025725	7.035	2.4825	29.175	7.5575	1.8725	0.1565	0.87575	0.03225
PoyangL	201409	0.00206	6.8175	2.5025	26.725	7.335	1.925	0.1075	0.9165	0.0445
PoyangL	201410	0.00304	7.3575	2.7125	21.375	7.4425	1.85	0.12975	0.8835	0.07475
PoyangL	201411	0.00207	7.6425	2.32	20.325	7.545	1.885	0.279	1.18425	0.064
PoyangL	201412	0.002225	7.915	2.735	12.8	7.34	2.08	0.56175	1.3675	0.0835
PoyangL	201501	0.0022325	7.8175	3.1975	10.575	7.3025	1.815	0.436	1.57	0.0755
PoyangL	201502	0.0021725	7.92	2.87	9.325	7.21	2.265	0.46	1.2875	0.0575
PoyangL	201503	0.0019475	7.645	2.625	11.725	7.3975	2.0075	0.52975	1.7175	0.094
PoyangL	201504	0.0017825	7.825	2.39	18.05	7.6175	2.225	0.336	1.32	0.06275
PoyangL	201505	0.00255	7.575	2.5225	21.15	7.34	1.775	0.24825	1.4175	0.08375
PoyangL	201506	0.00203	6.25	2.475	25	7.5775	2.15	0.18925	1.11	0.0545
PoyangL	201507	0.0022675	6.875	2.085	26.125	7.395	1.925	0.16925	0.97	0.0815
PoyangL	201508	0.00314	6.7	2.005	32.45	7.235	1.85	0.1875	1.0575	0.057
PoyangL	201509	0.0035025	6.8	2.2675	26.525	7.48	2.275	0.146	1.0675	0.0565
PoyangL	201510	0.003805	7.75	2.865	24.075	7.41	2.025	0.248	1.1775	0.05175
PoyangL	201511	0.002545	7.2	2.2825	18.175	7.5075	1.875	0.27475	1.5825	0.0495
PoyangL	201512	0.002845	7.65	3.335	14.4	7.47	2.2	0.45825	1.52	0.04875
PoyangL	201601	0.0024	8.65	2.1	12.775	7.4	1.875	0.3045	1.5725	0.04475
PoyangL	201602	0.0031	7.75	2.0875	8.875	7.4	2.1	0.21475	1.37	0.04275
PoyangL	201603	0.002625	7.75	2.4575	14.675	7.5	2.05	0.154	1.1875	0.10675
PoyangL	201604	0.0034	8.225	2.19	17.525	7.5	2.15	0.3835	1.5775	0.13475
PoyangL	201605	0.0025	7.9	2.1775	22.025	7.525	2.025	0.234	1.3625	0.05175
PoyangL	201606	0.002525	8.1	2.245	24.05	7.575	2.075	0.15425	1.4425	0.08425
PoyangL	201607	0.00235	7.65	2.2775	24.925	7.4475	1.9	0.15625	1.7225	0.08075
PoyangL	201608	0.002925	6.875	2.33	27.775	7.3175	2.05	0.1275	1.705	0.082
PoyangL	201609	0.002575	6.125	2.815	26.875	7.3625	2.125	0.164	1.3775	0.06675
PoyangL	201610	0.00296	7.375	2.2875	23.525	7.43	3.4	0.204	1.845	0.0695
PoyangL	201611	0.002375	7.975	2.0325	19.725	7.36	2.125	0.2025	1.4275	0.06125
PoyangL	201612	0.00297	8.575	2.56	14.575	7.3775	2.05	0.2495	1.9175	0.06575
TaiL	200701	0.015125	12.285	3.4625	4.8375	8.1625	2.9875	1.04625	2.45	0.0825
TaiL	200702	0.012875	11.5838	5.05	6.15	8.1275	3.8625	1.695	4.30663	0.087375
TaiL	200703	0.019875	10.7762	4.4	10.5125	7.9925	2.6375	1.6775	4.4325	0.124125
TaiL	200704	0.014	8.72875	4.0625	15.5375	7.91	3.4	0.38125	3.55687	0.09
TaiL	200705	0.06325	9.01875	4.075	23.025	8.00625	2.975	0.28625	3.66625	0.067875
TaiL	200706	0.028	7.7925	4.65	23.475	7.97	2.425	0.65625	2.8225	0.116
TaiL	200707	0.0315	7.31	4	29.025	8.2275	2.65	0.135	1.48875	0.054375
TaiL	200708	0.020625	7.4275	4.8875	34.4375	8.435	2.475	0.1275	1.79625	0.071875
TaiL	200709	0.025875	7.47625	3.3	25.175	8.26625	2	0.17625	1.07125	0.11
TaiL	200710	0.0193875	8.80125	4.2125	26.1375	8.31875	1.9375	0.2175	1.835	0.09625
TaiL	200711	0.083625	7.925	3.575	15.5375	8.395	2.25	0.22875	1.40125	0.0675
TaiL	200712	0.023625	9.53	4.4	10.3375	8.11125	1.75	0.42375	1.635	0.132
TaiL	200801	0.0318333	10.1257	3.85714	5.91429	8.25429	3.21429	0.744286	2.18286	0.0348571
TaiL	200802	0.00585714	11.8112	4.3375	0.6625	8.29125	2.775	0.78125	1.82625	0.0775
TaiL	200803	0.0142857	9.83875	3.9625	9.725	8.34125	3.2375	1.05875	3.55875	0.093375
TaiL	200804	0.0155714	8.90125	3.525	13.65	8.41125	2.1	0.59625	3.81625	0.0565
TaiL	200805	0.0148571	7.565	4.0625	21.775	8.715	2.3375	0.1025	2.49375	0.106125
TaiL	200806	0.0127143	7.39375	5.0375	24.225	8.4925	4.225	0.55	3.22125	0.067
TaiL	200807	0.0285714	7.38875	4.85	26.475	8.625	2.325	0.28625	2.39375	0.0775
TaiL	200808	0.0417143	7.9125	4.9875	29.2875	8.58875	2.9875	0.19875	1.85375	0.09625
TaiL	200809	0.026	8.34375	4.6	25.3375	8.0925	3.2625	0.2325	1.6575	0.09375
TaiL	200810	0.0662857	9.1375	4.175	20.9625	8.29	3	0.2375	1.58875	0.075
TaiL	200811	0.0708571	9.3375	4.3125	18.175	8.1725	1.7625	0.0975	1.43375	0.0475
TaiL	200812	0.0227143	10.425	4.3625	9.2125	8.38375	2.7625	0.2975	1.74875	0.06625
TaiL	200901	0.00775	10.925	4.0875	4.55	8.23125	2.5625	0.34875	1.8975	0.09
TaiL	200902	0.01	10.6125	3.8	6.825	8.43	2.3875	0.54125	1.9675	0.0825
TaiL	200903	0.005625	10.275	3.4875	6.3375	8.095	2.0125	0.75125	3.295	0.09875
TaiL	200904	0.012	10.5375	3.8125	12.4625	8.0075	2.225	0.45375	3.95	0.0875
TaiL	200905	0.023	9.1375	3.9125	20.8	8.36	2.2375	0.1425	3.18125	0.055
TaiL	200906	0.01175	7.9625	2.7375	26.0375	8.59625	1.475	0.14125	2.32625	0.03
TaiL	200907	0.061875	7.775	4.7125	27.7	8.555	2.4625	0.42375	3.02125	0.065
TaiL	200908	0.02125	6.91875	4.625	27.05	8.365	1.75	0.31625	2.1575	0.055
TaiL	200909	0.022375	6.785	5.1625	26.3875	8.5325	2.7375	0.14625	1.54375	0.065
TaiL	200910	0.0235	7.94	4.25	22.15	8.665	1.2875	0.13125	1.39875	0.06125
TaiL	200911	0.006875	9.025	3.9125	15.6625	8.20875	2.025	0.17625	1.2875	0.06625
TaiL	200912	0.0045	11.155	4.2125	8.35	7.9075	1.925	0.665	2.61625	0.10875
TaiL	201001	0.0065	11.8	4.3125	3.9125	8.1875	2.325	0.34	2.80375	0.09875
TaiL	201002	0.013125	11.2625	4.2875	6.4	8.39875	2.4625	0.72625	3.23375	0.09
TaiL	201003	0.00725	10.1125	3.95	8.3875	8.37125	2.3625	0.6525	3.50875	0.10125
TaiL	201004	0.007625	10.2125	4.15	12.725	8.17625	1.9625	0.37375	3.73375	0.09125
TaiL	201005	0.0175	8.4	3.6375	22.3375	8.475	1.625	0.27875	3.65	0.0725
TaiL	201006	0.012625	8.75	3.5125	23.0625	8.56125	1.6375	0.10375	2.97	0.0575
TaiL	201007	0.015375	7.2625	4.65	29.1	8.5525	2.5375	0.25125	2.06	0.038125
TaiL	201008	0.020125	8.85	4.7375	32.6875	8.98625	4.2	0.195	1.78125	0.05125
TaiL	201009	0.058375	7.7875	5.0875	28.7375	9.14625	2.5125	0.08375	1.61625	0.08625
TaiL	201010	0.04275	8.9625	4.9625	21.8625	8.78375	3.2125	0.15625	1.5625	0.0525
TaiL	201011	0.02025	10.1125	4.25	15.0125	8.58	1.925	0.195	1.43875	0.05125
TaiL	201012	0.0205	9.825	5.45	14.4	8.64625	2.725	0.205	1.9375	0.0475
TaiL	201101	0.009625	13.2875	4.925		8.3725	2.8125	0.64	2.67875	0.08125
TaiL	201102	0.009125	12.3	5.925		8.595	3.225	0.84375	3.155	0.1225
TaiL	201103	0.017	11.4625	3.8625		8.51125	2.625	0.64375	2.49375	0.08625
TaiL	201104	0.01525	10.1875	3.9375		8.20375	2.7	0.37625	2.82875	0.06125
TaiL	201105	0.01075	9.6375	3.775		8.2475	1.625	0.11375	2.81875	0.05125
TaiL	201106	0.00825	8.6375	3.9375		8.1475	2.1625	0.285	2.96875	0.04625
TaiL	201107	0.010625	7.9125	3.625		8.43875	1.9875	0.1925	2.99875	0.05625
TaiL	201108	0.032625	8.525	3.9625		8.66625	2.025	0.155	1.79125	0.0675
TaiL	201109	0.0465	8.0625	5.25		8.35125	3.35	0.25625	1.4975	0.115
TaiL	201110	0.04725	9.0625	4.25		8.27375	2.975	0.08125	1.25875	0.07875
TaiL	201111	0.020125	9.225	4.375		7.89125	2.4375	0.185	1.5525	0.06875
TaiL	201112	0.02375	10.85	4.1375		7.895	2.125	0.14375	1.32375	0.065
TaiL	201201	0.0165	12.45	3.975	5.35	7.46875	3.225	0.19125	1.84375	0.08125
TaiL	201202	0.014625	12.4125	4.15	5.7625	7.84	3.1125	0.3975	2.42625	0.055
TaiL	201203	0.012	11.4325	3.8375	7.1375	7.49125	2.6625	0.67625	3.16875	0.08
TaiL	201204	0.016125	9.805	3.9375	16	8.05875	2.1	0.29875	3.04375	0.09625
TaiL	201205	0.024625	9.4225	3.4875	23.7125	8.35	1.9875	0.07875	2.65	0.04625
TaiL	201206	0.02875	7.79	3.875	23.825	8.155	2.525	0.17375	2.33125	0.06
TaiL	201207	0.0165	8.6525	3.075	30.35	8.54375	1.5625	0.07125	2.1225	0.04
TaiL	201208	0.026375	7.9175	3.5625	29.975	8.445	2.6	0.14375	1.74	0.08125
TaiL	201209	0.0243125	8.14875	3.825	26.45	8.365	2.775	0.1075	1.63375	0.070625
TaiL	201210	0.0515	9.87125	4.1875	22.4875	8.8875	3.325	0.045	1.3125	0.06375
TaiL	201211	0.024875	10.1813	3.8375	14.9125	8.34875	2.9125	0.23	1.54625	0.0575
TaiL	201212	0.014	11.3275	4.375	8.975	8.045	3.5625	0.3325	1.93	0.06625
TaiL	201401	0.02225	12.6487	4.3875	5.85	8.19125	3.4875	0.15	1.6475	0.07125
TaiL	201402	0.0145	12.4462	4.0625	4.2875	7.9175	3.15	0.24125	2.79125	0.085
TaiL	201403	0.01725	11.8012	4.425	9.275	8.14125	2.0125	0.3175	2.46	0.0625
TaiL	201404	0.017625	9.72125	3.125	17.9125	8.20375	1.825	0.03875	2.2275	0.04
TaiL	201405	0.018	9.39375	2.825	18.8375	8.45375	1.575	0.05125	2.74375	0.075
TaiL	201406	0.0135	8.3125	3.9625	24.5125	8.3425	1.925	0.05875	2.4125	0.07125
TaiL	201407	0.017625	7.98375	4.0375	25.2375	8.07875	2.2875	0.22125	2.04375	0.04
TaiL	201408	0.014375	9.62	4.3	33.2125	8.88625	2.75	0.0775	1.42375	0.04375
TaiL	201409	0.015125	8.37125	4.2875	27.0375	8.325	2.35	0.13875	1.34	0.06875
TaiL	201410	0.02575	9.59875	4.1625	22.525	8.35625	1.3875	0.06625	1.205	0.07875
TaiL	201411	0.02925	10.095	3.9125	17.325	8.16875	2.4875	0.0625	1.22	0.0425
TaiL	201412	0.02075	11.2875	3.925	10.1375	8.17	1.8625	0.10875	1.3025	0.0625
TaiL	201501	0.0135	12.3488	4.2375	6.9625	7.8375	2.4875	0.115	1.775	0.05
TaiL	201502	0.008375	12.6075	4.0375	5.525	7.8525	2.275	0.23375	2.17625	0.0375
TaiL	201503	0.01375	11.985	5.3375	8.0125	7.885	3.0125	0.145	2.1675	0.07625
TaiL	201504	0.01525	10.2287	3.8875	14.95	8.30125	2.375	0.09625	2.57	0.0425
TaiL	201505	0.005	8.78375	3.8625	21.225	8.44375	2.125	0.06375	2.46875	0.065
TaiL	201506	0.041375	8.935	3.5625	23.6375	8.67625	2.2875	0.0725	2.0975	0.06375
TaiL	201507	0.0535	9.56875	3.975	25.9125	8.25375	2.925	0.11	2.3825	0.06375
TaiL	201508	0.018625	8.34125	3.9	32.675	8.7625	2.175	0.0825	1.245	0.04
TaiL	201509	0.03325	9.16625	4.425	27.475	8.62	2.3375	0.1375	1.0075	0.06
TaiL	201510	0.019125	9.18	4.4375	20.85	8.14625	2.275	0.13	1.4075	0.0725
TaiL	201511	0.06325	9.82125	4.05	16.825	8.135	1.7625	0.21875	0.91375	0.07375
TaiL	201512	0.018	11.2587	3.725	10.2625	7.96875	1.95	0.14	1.32	0.05
TaiL	201601	0.004875	10.95	4.05	9.6125	7.8875	2.45	0.2375	2.29875	0.0575
TaiL	201602	0.00475	12.275	3.925	6.8625	7.8375	2.5375	0.15875	2.20875	0.075
TaiL	201603	0.0155	11.05	4.225	12.5	8.0625	2.75	0.315	2.5325	0.0675
TaiL	201604	0.010875	10.15	3.6125	15.75	8.0125	2.4	0.22125	2.3275	0.06875
TaiL	201605	0.008375	9.0875	3.9625	23.9625	8.15	2.4375	0.075	2.13625	0.0725
TaiL	201606	0.008125	8.8	3.9	22.175	8.175	2.775	0.13375	1.86	0.08625
TaiL	201607	0.00865	8.695	3.6625	26.4125	8.61375	2.9375	0.095	1.415	0.0575
TaiL	201608	0.0077875	8.5775	3.5625	31.75	8.52375	2.5625	0.0815625	0.92	0.06125
TaiL	201609	0.0083875	8.135	4.425	26.475	8.2475	2.45	0.08	0.84625	0.07625
TaiL	201610	0.00954	8.435	3.7125	20.775	7.635	2.2375	0.10625	1.25625	0.07625
TaiL	201611	0.02711	9.65	3.1875	17.0125	8.235	1.675	0.09625	1.64625	0.05875
TaiL	201612	0.0353125	10.95	3.175	12.6875	8.2425	1.75	0.12375	1.5325	0.0375
SongtaoR	201201	0.002	6.8	2.01	14	7.1	2.1		0.72	0.022
SongtaoR	201203	0.002	6.7	2.28	15.5	7.36		0.05	0.83	0.022
SongtaoR	201204	0.003	6.8	1.86	24	7.24			0.79	0.024
SongtaoR	201206	0.009	6.8	2.03	29	7.29		0.037	0.35	0.02
SongtaoR	201207	0.006	6.7	2.3	28	7.03		0.03	0.93	0.02
SongtaoR	201208	0.005	6.7	2.4	31	6.93	2	0.064	0.79	0.02
SongtaoR	201209	0.004	6.6	2.1	29	6.82	2	0.043	0.83	0.02
SongtaoR	201210	0.006	6.7	2.3	28.5	6.77	2.2	0.027	0.88	0.02
SongtaoR	201211	0.005	6.8	2.39	26	7.57	1.8	0.1	0.8	0.02
SongtaoR	201212	0.005	6.6	2.12	23	7.49	1.9	0.072	0.71	0.02
SongtaoR	201401	0.001	6.5	2.04	26.5	6.96	0.6	0.01	0.41	0.013
SongtaoR	201402	0.0015	6.6	2.12	27.5	6.55	0.6	0.025	0.68	0.015
SongtaoR	201403	0.0014	6.4	1.86	27.4	6.92	1.6	0.007	0.45	0.015
SongtaoR	201404	0.0022	7.02	1.77		6.84	2.61	0.025	0.46	0.02
SongtaoR	201405	0.0017	7.3	1.68	28.5	6.11	1.6	0.028	0.483	0.019
SongtaoR	201406	0.002	6.8	1.67	27.3	7.16	0.25	0.068	0.2	0.02
SongtaoR	201407	0.0026	7.62	1.99	28	7.62	2.06	0.036	0.77	0.022
SongtaoR	201408	0.0023	6.87	2.75	28.9	8.04	0.9	0.0125	0.33	0.021
SongtaoR	201409	0.0013	6.4	2.12	27	7.55	0.5	0.033	0.46	0.024
SongtaoR	201410	0.0029	6.4	2.2	29	7.26	0.6	0.075		0.02
SongtaoR	201411	0.0039	6.5	2.04	26.2	7.76	0.6	0.065	0.24	0.019
SongtaoR	201412	0.0032	6.4	2.11	23	7.91	0.8	0.087	0.56	0.021
SongtaoR	201501	0.0018	6.3	2	21.5	7.9	0.7	0.078	0.58	0.02
SongtaoR	201502	0.0014	6.8	1.9	21	7.3	0.5	0.081	0.77	0.022
SongtaoR	201503	0.0007	6.5	1.8	24.5	7.3	0.9	0.0125	0.7	0.02
SongtaoR	201504	0.0016	6.8	2.2	27	7.7	1.1	0.064	0.56	0.02
SongtaoR	201505	0.0011	6.9	2	26	7.9	1.4	0.074	0.72	0.02
SongtaoR	201506	0.0013	7	1.9	24	7.9	0.67	0.025	0.49	0.02
SongtaoR	201507	0.0016	7.1	2	25.5	7.9	0.54	0.074	0.64	0.023
SongtaoR	201508	0.0022	7.14	2	28	7.7	0.77	0.097	0.15	0.021
SongtaoR	201509	0.0015	7.03	2	32	7	0.83	0.103	0.43	0.022
SongtaoR	201510	0.0034	7.23	2	29	7.8	0.58	0.072	0.46	0.022
SongtaoR	201511	0.0035	7.2	2	26	7.6	0.89	0.0125	0.89	0.023
SongtaoR	201512	0.0029	7.42	1.9	25.5	7	0.54	0.046	0.83	0.022
SongtaoR	201601	0.0021	7	1.9	21	7.5	1	0.095	0.7	0.022
SongtaoR	201602	0.0026	7.6	2.2	21.3	7.7	0.25	0.071	0.421	0.02
SongtaoR	201603	0.0019	7.5	1.88	25	7.9	1	0.08	0.15	0.022
SongtaoR	201604	0.0017	6.9	1.84	25	8	1.3	0.034	0.2	0.02
SongtaoR	201605	0.0016	7.7	2	28.8	7.9	0.5	0.103	0.16	0.022
SongtaoR	201606	0.0017	7.4	1.9	29.6	7.3	0.6	0.043	0.31	0.021
SongtaoR	201607	0.0016	6.2	2.1	29.8	7.4	1.4	0.066	0.29	0.022
SongtaoR	201608	0.002	7.2	2.24	29.6	7.33	1.1	0.0125	0.22	0.01
SongtaoR	201609	0.0032	7.5	2	29.9	7.68	0.25	0.123	0.34	0.02
SongtaoR	201610	0.0029	7.3	2.3	29.2	7.14	0.5	0.066	0.23	0.02
SongtaoR	201611	0.0009	6.99	2.12	25.5	7.06	3	0.012	0.33	0.02
SongtaoR	201612	0.0013	6.3	2.08	23.5	7.08	1.2	0.083	0.18	0.01
DaguangbaR	201202	0.005	6.3	2.1	20	7.59	0.5	0.146	0.56	0.023
DaguangbaR	201203	0.006	6.2	2.5	20	7.26		0.468	0.76	0.032
DaguangbaR	201204	0.005	7	2.2	22	7.74	0.5	0.181	0.35	0.014
DaguangbaR	201205	0.008	6	2	28	7.55	0.8	0.176	0.89	0.022
DaguangbaR	201206	0.006	6.2	1.9	30	7.43	1	0.136	0.97	0.04
DaguangbaR	201207	0.009	6.4	2	30	7.2	0.6	0.108	0.59	0.05
DaguangbaR	201208	0.01	6.6	2	32	7.43	0.5	0.187	0.61	0.03
DaguangbaR	201209	0.006	6.2	2	30	6.46	0.6	0.131	0.81	0.03
DaguangbaR	201210	0.006	5.7	2.1	30	7.48	0.5	0.103	0.72	0.04
DaguangbaR	201211	0.004	6.4	2.1	31	7.72	0.5	0.176	0.87	0.02
DaguangbaR	201212	0.02	6.4	2	31	7.47	1	0.136	0.43	0.02
DaguangbaR	201401	0.0036	6.67	2	27	7.4	0.54	0.187	0.463	0.035
DaguangbaR	201402	0.0039	6.24	2.2	30	7.28	0.51	0.029	0.412	0.05
DaguangbaR	201403	0.004	6.2	2.1	29	7.16	0.52	0.1	0.422	0.029
DaguangbaR	201404	0.0017	7.1	2.1	29	7.22	0.52	0.027	0.455	0.05
DaguangbaR	201405	0.002	7.5	2	29	7.11	0.51	0.09	0.419	0.016
DaguangbaR	201406	0.0053	6.11	2.1	29	7.02	0.25	0.115	0.422	0.036
DaguangbaR	201407	0.0031	5.9	2	28	7.76	1.8	0.046	0.495	0.05
DaguangbaR	201408	0.0036	6.72	2.2	30	7.4	1.08	0.147	0.491	0.032
DaguangbaR	201409	0.0147	7	2	29.5	6.95	1.3	0.58	0.683	0.038
DaguangbaR	201410	0.0027	6.9	2	30	7.42	0.9	0.088	0.591	0.015
DaguangbaR	201411	0.0079	7.62	2.2	29	7.38	0.25	0.259	0.584	0.046
DaguangbaR	201412	0.0073	5.1	2.1	26	7.22	0.25	0.083	0.525	0.049
DaguangbaR	201501	0.002	7.67	2	26	7.7	1	0.099	0.535	0.032
DaguangbaR	201502	0.004	8.76	2.2	27	7.5	2	0.099	0.344	0.04
DaguangbaR	201503	0.001	7.5	2.2	27	7.3	2.1	0.056	0.518	0.045
DaguangbaR	201504	0.0028	8.06	2.1	23	7.5	2	0.108	0.53	0.049
DaguangbaR	201505	0.0029	7.4	2.1	25	7.5	1.8	0.071	0.1	0.018
DaguangbaR	201506	0.0072	7	2.2	28	7.2	1.8	0.15	0.779	0.045
DaguangbaR	201507	0.0015	7.9	2.1	25	7.2	0.25	0.17	0.327	0.021
DaguangbaR	201508	0.0032	7.7	2.1	25	7.1	1.5	0.202	0.373	0.021
DaguangbaR	201509	0.0032	7.9	2.2	26	7.4	0.25	0.15	0.3	0.017
DaguangbaR	201510	0.0036	6.6	2.2	25	7.1	0.7	0.167	0.411	0.018
DaguangbaR	201511	0.0032	7.3	2.2	28	7.3	0.7	0.103	0.44	0.02
DaguangbaR	201512	0.0013	6.21	2.4	29.7	7.5	0.8	0.061	0.8	0.02
DaguangbaR	201601	0.0046	7.2	2.3	27	7.6	0.25	0.108	0.21	0.02
DaguangbaR	201602	0.0014	6.9	1.84	18.5	7.7	0.6	0.361	0.52	0.021
DaguangbaR	201603	0.0022	6.9	2.2	24.7	8	1.5	0.09	0.479	0.02
DaguangbaR	201604	0.0023	8.3	2.5	24.7	8.4	0.7	0.09	0.633	0.02
DaguangbaR	201605	0.002	7.5	2.3	32.1	7.7	0.8	0.359	0.45	0.02
DaguangbaR	201606	0.0021	7.7	1.4	31.2	8.5	1.4	0.123	0.15	0.01
DaguangbaR	201607	0.0016	7.38	2.3	31.9	6.87	0.7	0.101	0.35	0.01
DaguangbaR	201608	0.0013	7.65	2.4	28.5	7.81	0.25	0.309	0.35	0.005
DaguangbaR	201609	0.0008	9.55	2.6	31.3	7.68	1.8	0.134	0.34	0.02
DaguangbaR	201610	0.0012	7.38	2.6	31.1	7.09	0.7	0.15	0.344	0.02
DaguangbaR	201611	0.0011	8.83	2.8	28.4	7.04	1.3	0.281	0.412	0.01
DaguangbaR	201612	0.0018	6.94	1.3	27.4	6.93	0.6	0.093	0.412	0.01
MiyunR	200701	0.00507	10.1	2.6	4	7.66	1	0.237	0.45	0.005
MiyunR	200702	0.00418	11.7	2.8	2	8.52	1	0.31	0.54	0.01
MiyunR	200703	0.00502	11.8	1.9	1	7.97	1	0.177	0.57	0.01
MiyunR	200704	0.00536	11.7	1.75	4.5	7.66	1	0.275	0.465	0.005
MiyunR	200705	0.00308	9.79	3.1	14	8.13	1	0.231	0.52	0.005
MiyunR	200706	0.00212	8.72	3.55	17	8.26	1	0.094	0.46	0.007
MiyunR	200707	0.00371	8.37	3.8	22	8.55	1	0.115	0.365	0.013
MiyunR	200708	0.00433	7.76	2.7	26.5	8.4	1	0.104	0.44	0.013
MiyunR	200709	0.00833	7.44	2.55	22	8.4	1	0.079	0.385	0.005
MiyunR	200710	0.00613	8.82	3.05	16	8.11	1	0.085	0.43	0.005
MiyunR	200711	0.00397	8.6	2.9	11.4	8.08	1	0.176	0.445	0.008
MiyunR	200712	0.004	10.65	1.45	2	7.94	1	0.113	0.43	0.008
MiyunR	200801	0.00329	9.47	2.2	0	8.82	1	0.104	0.44	0.01
MiyunR	200803	0.00263	11.4	2.2	1	8.12	1	0.075	0.43	0.01
MiyunR	200804	0.00402	11.2	2.3	8.3	8.11	1	0.081	0.55	0.01
MiyunR	200805	0.0049	9.5	2.6	15.5	8.51	1	0.125	0.57	0.005
MiyunR	200806	0.00619	8.7	2.6	18.3	8.38	1	0.117	0.46	0.005
MiyunR	200807	0.00565	8	2.8	23	8.66	1	0.15	0.46	0.01
MiyunR	200808	0.00385	8.5	2.8	28.3	8.53	1	0.11	0.41	0.005
MiyunR	200809	0.00488	7.98	2.8	25.2	8.4	1	0.142	0.42	0.007
MiyunR	200810	0.00388	8.34	3.4	17	8.28	1	0.094	0.46	0.01
MiyunR	200811	0.00245	9.94	3.4	6.8	8.21	1	0.096	0.4	0.005
MiyunR	200812	0.00253	9.56	3	2	7.98	1	0.115	0.46	0.005
MiyunR	200901	0.00253	9.56	3	2	7.98	1	0.115	0.46	0.005
MiyunR	200902	0.00253	9.56	3	2	7.98	1	0.115	0.46	0.005
MiyunR	200903	0.00253	9.56	3	2	7.98	1	0.115	0.46	0.005
MiyunR	200904	0.00144	11.4	2.8	15	7.53	2.3	0.01	0.43	0.01
MiyunR	200905	0.00245	10.2	2.9	17	8.07	1	0.035	0.42	0.01
MiyunR	200906	0.00245	9.7	3	21	8.15	1	0.01	0.41	0.005
MiyunR	200907	0.00222	8.1	3.1	26.5	8.21	1	0.022	0.46	0.005
MiyunR	200908	0.00376	8.7	3	27.5	8.68	1	0.018	0.49	0.02
MiyunR	200909	0.00346	8.3	2.9	20.8	8.43	1	0.01	0.34	0.025
MiyunR	200910	0.0073	8.4	2.7	20.5	8.68	1	0.056	0.28	0.013
MiyunR	200911	0.00292	9.4	3.3	6.5	7.99	1	0.054	0.36	0.02
MiyunR	200912	0.00369	9	2.5	3.5	8	1	0.01	0.41	0.02
MiyunR	201004	0.00313	9.5	2.5	4.5	8.37	0.4	0.021	0.39	0.02
MiyunR	201005	0.0035	9.8	2.8	12.8	7.61	0.6	0.026	0.38	0.015
MiyunR	201006	0.0046	10.5	2.25	19	7.95	0.8	0.026	0.39	0.008
MiyunR	201007	0.0023	7.8	2.8	27.8	8.01	0.6	0.041	0.39	0.015
MiyunR	201008	0.00558	8.6	3	27	7.7	0.5	0.04	0.4	0.02
MiyunR	201009	0.00315	8.6	3	24.7	7.9	0.4	0.089	0.41	0.001
MiyunR	201010	0.00464	8.6	2.5	11	7.98	0.4	0.021	0.38	0.02
MiyunR	201011	0.001053	8.7	2.5	12.5	8.01	0.4	0.054	0.39	0.02
MiyunR	201012	0.001384	9	2.65	3.8	8.18	0.9	0.034	0.41	0.02
MiyunR	201101	0.00188	8.8	2.6		8.14	0.7	0.058	0.42	0.02
MiyunR	201102	0.001384	9	2.65		8.18	0.9	0.034	0.41	0.02
MiyunR	201103	0.00263	8.76	2.55		7.78	0.7	0.098	0.4	0.02
MiyunR	201104	0.0024	8.61	2.65		8.1	0.5	0.075	0.4	0.01
MiyunR	201105	0.00133	8.61	2.8		8.19	0.4	0.049	0.4	0.02
MiyunR	201106	0.00423	8.55	2.75		8.13	0.4	0.039	0.39	0.02
MiyunR	201107	0.00336	8.57	2.6		8.23	0.4	0.071	0.43	0.02
MiyunR	201108	0.00303	8.49	2.25		8.36	0.9	0.054	0.43	0.02
MiyunR	201109	0.00476	8.49	2.6		7.49	0.7	0.062		0.015
MiyunR	201110	0.00585	8.45	2.3		8.26	0.6	0.034		0.02
MiyunR	201111	0.00808	8.44	2.6		7.49	0.7	0.172		0.02
MiyunR	201112	0.00373	8.6	2.7		7.82	0.6	0.163	0.99	0.02
MiyunR	201201	0.0061	8.28	2.6	1	7.88	0.6	0.223		0.02
MiyunR	201202	0.00464	8.6	2.7	1	7.58	0.6	0.258		0.02
MiyunR	201203	0.00498	8.68	2.7	1	7.68	0.6	0.057		0.02
MiyunR	201204	0.00207	8.39	2.6	13.7	7.9	0.4	0.066		0.02
MiyunR	201205	0.00361	8.39	2.65	18.5	8.11	0.4	0.061		0.02
MiyunR	201206	0.005	8.37	2.65	20	8.08	0.4	0.04		0.02
MiyunR	201207	0.00321	8.36	1.95	26.9	8.04	0.4	0.052		0.015
MiyunR	201208	0.00588	8.37	2.45	28.5	7.96	0.4	0.041		0.02
MiyunR	201209	0.00427	8.33	2.25	21	7.16	0.4	0.055		0.02
MiyunR	201210	0.00647	8.37	2.45	18	7.49	0.4	0.063		0.02
MiyunR	201211	0.00383	8.36	2.6	7.3	7.11	0.4	0.068		0.02
MiyunR	201212	0.00562	8.39	2.85	0	7.35	0.4	0.064		0.02
MiyunR	201501	0.0059	12.55	1.7	1.9	7.64	1	0.082	0.815	0.013
MiyunR	201502	0.00524	13.9	1.8	2.8	8.28	1	0.037	0.71	0.007
MiyunR	201503	0.00362	13.15	1.8	3.1	8.35	1	0.051	0.745	0.007
MiyunR	201504	0.00404	13.5	2.25	8.2	8.38	1	0.059	0.805	0.025
MiyunR	201505	0.00566	11.2	1.6	16.1	8.39	1.5	0.035	0.815	0.005
MiyunR	201506	0.00628	10.8	2.15	23.1	8.32	2	0.054	0.61	0.013
MiyunR	201507	0.00278	10.85	1.8	26.1	8.26	1.5	0.08	0.835	0.035
MiyunR	201508	0.00423	8.55	2.15	27.3	8.71	0.63	0.082	0.385	0.035
MiyunR	201509	0.00599	8	2.05	25.3	8.29	0.25	0.106	0.48	0.035
MiyunR	201510	0.00568	8.75	2.15	19.7	8.6	0.25	0.029	0.605	0.045
MiyunR	201511	0.00662	11.1	1.8	13.8	7.96	0.9	0.0125	0.815	0.02
MiyunR	201512	0.0047	8.3	1.75	6.7	8.01	0.25	0.15	0.94	0.005
MiyunR	201601	0.00653	13.3	1.8	1.7	8	0.25	0.033	0.71	0.02
MiyunR	201602	0.00746	13	1.8	3.3	8.1	0.25	0.033	0.89	0.005
MiyunR	201603	0.0036	8.8	2.3	0	8.3	0.9	0.153	0.67	0.01
MiyunR	201604	0.00456	10.4	1.5	10	8.2	0.25	0.068	0.95	0.005
MiyunR	201605	0.00572	10.5	2	17.1	8.3	0.25	0.057	1.28	0.02
MiyunR	201606	0.00417	11.2	2.7	22.3	8.7	0.25	0.047	0.77	0.005
MiyunR	201607	0.00615	10.9	2.8	27.5	8.63	0.25	0.084	0.7	0.005
MiyunR	201608	0.00324	8.2	2.9	29.6	8.67	0.6	0.056	0.66	0.01
MiyunR	201609	0.00587	6	2.7	30.6	8.43	0.9	0.142	1.27	0.01
MiyunR	201610	0.0028	7.17	2.6	15	8.55	0.25	0.116	0.71	0.02
MiyunR	201611	0.00166	7.6	2	13.9	7.94	0.25	0.047	0.98	0.005
MiyunR	201612	0.00443	12.5	1.9	7	8.19	0.25	0.0125	1.33	0.005
Baiyangdian	200701	0.03362	8.39	7.31333	1.025	7.76	4.67333	0.649333	7.21333	0.076
Baiyangdian	200702	0.057125	16.225	7.95		8.1675	4.525	0.415	4.4525	0.069
Baiyangdian	200703	0.01638	15.064	7.06	6.28	8.314	3.64	0.354	2.608	0.0652
Baiyangdian	200704	0.01192	10.002	8.9	13.74	8.054	2.6	4.7514	5.636	0.225
Baiyangdian	200705	0.01848	9.72	8.64	21.2	8.44	4.28	0.37	1.136	0.1592
Baiyangdian	200706	0.02728	7.646	9.94	24.38	8.586	7.1	2.7288	3.868	0.3078
Baiyangdian	200707	0.04714	7.296	10.42	28.44	8.004	4.06	3.0508	4.938	0.2024
Baiyangdian	200708	0.048825	3.3275	9.575	27.725	8.05	5.55	3.43675	3.7125	0.2805
Baiyangdian	200709	0.0821	5.87	10.1425	24.275	7.875	5.775	6.084	7.1	0.41425
Baiyangdian	200710	0.06785	8.7925	10.7	16.5	8.15	3.05	5.01125	6.42	0.5865
Baiyangdian	200711	0.024375	4.16	12.275	10.05	8.4725	3.375	8.45175	10.81	0.736
Baiyangdian	200712	0.01435	7.7025	10.1	2.7	8.06	3.9	8.7435	11.28	0.7395
Baiyangdian	200801	0.0054	5.8	9.7	1.4	7.88	2	0.282	1.08	0.337
Baiyangdian	200802	0.00313333	13.1333	11.4	3.23333	7.77667	2	0.572	1.53	0.073
Baiyangdian	200803	0.00434	10.378	9.52	10.08	8.15	4.06	6.908	10.57	0.269
Baiyangdian	200804	0.0047	10.728	8.18	13.08	8.002	3.38	6.9866	9.834	0.348
Baiyangdian	200805	0.01794	6.962	9.62	20.5	8.014	4.38	7.407	9.21	0.806
Baiyangdian	200806	0.06507	9.97	9.02	24.08	8.288	2.5	0.4668	1.296	0.235
Baiyangdian	200807	0.04276	6.494	8.88	26.74	8.178	4.48	4.1466	6.054	0.4644
Baiyangdian	200808	0.0285	6.804	8.9	30.86	8.192	4.06	2.156	3.502	0.26
Baiyangdian	200809	0.06118	5.91	9.68	25.66	7.822	2.66	5.359	9.226	0.2362
Baiyangdian	200810	0.02406	5.148	8.8	17.14	7.994	2.62	1.9672	3.802	0.0382
Baiyangdian	200811	0.0141	8.356	8.8	12.32	7.878	2.96	2.2126	4.718	0.141
Baiyangdian	200812	0.04796	9.74	8.74	5.62	8.058	2	0.8636	4.336	0.1392
Baiyangdian	200901	0.0077	10.9	9.18	1.86	8.086	3.76	0.7306	3.288	0.0966
Baiyangdian	200902	0.0066	11.48	9.13333	3.4	7.70667	2.3	0.319	1.3	0.0333333
Baiyangdian	200903	0.00198	9.772	9.72	4.04	8.172	2.82	5.0682	6.266	0.119
Baiyangdian	200904	0.00456	9.036	9.7	12.06	8.276	2.48	4.5446	6.8	0.1232
Baiyangdian	200905	0.0054	7.566	10.54	23.82	8.294	1	1.8662	3.086	0.1942
Baiyangdian	200906	0.005	10.6	10.46	24.32	8.09	2.16	2.9968	3.44	0.2
Baiyangdian	200907	0.01502	6.718	8.72	28.56	8.324	2.38	1.0878	2.298	0.1988
Baiyangdian	200908	0.00202	7.42	8.58	29.58	8.21	2.68	4.452	5.398	0.2716
Baiyangdian	200909	0.003296	7.198	8.5	24.64	8.104	2.9	4.7806	7.03	0.2794
Baiyangdian	200910	0.0071	6.794	8.18	18.46	8.058	2.74	3.8762	4.696	0.3154
Baiyangdian	200911	0.01224	7.062	8.52	8.26	8.024	3.1	5.776	8.194	0.5694
Baiyangdian	200912	0.00808	9.88	8.06	3.72	7.864	2.82	6.764	8.732	0.445
Baiyangdian	201001	0.00285	8.635	9.2	0.35	7.815	3.25	12.875	15.71	1.2905
Baiyangdian	201002	0.0024	9.982	7.62	1.58	7.926	1.98	5.7314	10.98	0.2846
Baiyangdian	201003	0.00496667	11.7033	6.46667	5.36667	8.02667	2.13333	6.97367	11.1967	0.582667
Baiyangdian	201004	0.01014	9.778	6.54	10.6	8.142	2.72	6.0626	8.548	0.2334
Baiyangdian	201005	0.01076	9.18	7.28	20.4	8.208	2.54	11.7908	13.124	0.2782
Baiyangdian	201006	0.00422	6.584	7.86	25.56	8.162	3.06	10.4224	12.59	0.8576
Baiyangdian	201007	0.00296	4.61	8.64	31.74	7.872	2.68	2.3034	5.03	0.2648
Baiyangdian	201008	0.00646	4.422	8.22	30.62	7.78	3.86	2.6146	3.886	0.2444
Baiyangdian	201009	0.00324	4.048	7.22	26.6	7.954	3.26	2.1696	3.242	0.152
Baiyangdian	201010	0.00388	7.776	7.44	19.86	8.014	2.48	1.897	3.034	0.0744
Baiyangdian	201011	0.00404	8.306	6.8	11.4	8.058	2.34	1.7818	2.74	0.0726
Baiyangdian	201012	0.00428	10.72	7.26	3.58	8.14	2.16	1.8146	2.634	0.0694
Baiyangdian	201101	0.00193333	11.2767	7.3		7.93667	2.6	0.654667	2.03	0.0656667
Baiyangdian	201102	0.0025	9.47	7.6		7.95	2.5	3.71	10.2	0.964
Baiyangdian	201103	0.0031	10.364	5.8		8.094	4.3	3.0988	5.838	0.2252
Baiyangdian	201104	0.00254	9.514	6.76		8.094	3.32	1.8674	3.978	0.14
Baiyangdian	201105	0.0044	11.278	6.92		8.476	3.08	1.7836	3.972	0.1792
Baiyangdian	201106	0.00152	6.748	6.16		8.346	3.32	1.8966	3.786	0.1706
Baiyangdian	201107	0.0041	7.742	9.2		8.206	3.6	2.518	5.21	0.3204
Baiyangdian	201108	0.00266	8.252	7.68		7.806	3.48	2.903	4.642	0.2714
Baiyangdian	201109	0.00226	4.522	6.7		7.926	2.82	2.3218	4.88	0.1872
Baiyangdian	201110	0.00228	7.48	6.46		7.93	1.72	2.8012	4.964	0.0976
Baiyangdian	201111	0.00262	6.696	7.66		7.844	1.5	3.3092	6.762	0.105
Baiyangdian	201112	0.00228	10.7	7.36		7.666	2.12	3.5766	6.69	0.1326
Baiyangdian	201202	0.00228	16.224	5.48	2.06	7.916	2.82	4.0032	9.032	0.1988
Baiyangdian	201203	0.00172	10.572	5.3	5.1	7.814	3.375	3.0714	9.048	0.1936
Baiyangdian	201204	0.00232	11.34	6.68	14.22	8.19	3.58	2.7846	7.944	0.1126
Baiyangdian	201205	0.00214	9.826	6.98	22.2	8.298	3.98	3.0078	4.702	0.154
Baiyangdian	201206	0.00612	10.29	13.54	26.32	8.224	7.5	4.518	6.862	0.5534
Baiyangdian	201207	0.00494	7.474	10.04	29.5	7.354	5.32	3.0704	4.714	0.2684
Baiyangdian	201208	0.0028	3.6	6.24	26.42	7.748	3.9	1.5992	4.622	0.2462
Baiyangdian	201209	0.02182	5.45	6.96	24.28	6.952	4.06	1.6316	3.372	0.1794
Baiyangdian	201210	0.02182	6.95	7.6	20.8	7.882	5.16	0.9696	4.366	0.1754
Baiyangdian	201211	0.00202	7.636	7.2	13.34	8.008	3.6	3.3674	6.558	0.2296
Baiyangdian	201212	0.00426	9.328	6.64	3.38	8.012	3.76	3.077	4.338	0.2138
Baiyangdian	201403	0.001994	9.814	5.66	4.8	8.014	4.94	1.6198	5.0328	0.1646
Baiyangdian	201404	0.001886	8.708	4.16	17.46	8.016	3.88	1.21	2.965	0.223
Baiyangdian	201405	0.002226	7.196	4.48	18.02	8.09	4.24	1.4228	1.9	0.2986
Baiyangdian	201406	0.002128	5.886	4.94	25.5	8.1	4.6	3.4814	4.716	0.2308
Baiyangdian	201407	0.002008	7.186	7.28	29.06	8.094	6.04	4.1352	5.0572	0.402
Baiyangdian	201408	0.00433	5.774	7.62	30.68	8.152	6.84	3.648	5.008	0.2376
Baiyangdian	201409	0.003822	6.982	6.1	26.98	8.012	5.14	1.9142	7.2	0.124
Baiyangdian	201410	0.003152	6.698	6.06	19.26	8.056	2.94	4.0762	7.1764	0.1496
Baiyangdian	201411	0.003034	7.644	7.48	15.18	8.012	4.48	4.452	7.326	0.2104
Baiyangdian	201412	0.002688	13.34	7.68	3.12	7.986	3.66	4.1988	6.772	0.244
Baiyangdian	201501	0.00265	9	6.4	1.7	7.83	2.4	25.4	35	1.26
Baiyangdian	201503	0.00227	10.9	4.52	5.02	8.05	2.7	3.2722	7.194	0.3118
Baiyangdian	201504	0.0021	8.54	5.28	13.24	8.138	1.62	3.4084	6.024	0.2828
Baiyangdian	201505	0.001916	7.2	6.94	21.72	8.226	3.4	2.887	4.764	0.2454
Baiyangdian	201506	0.001772	6.604	6.76	27.7	8.13	1.94	3.354	6.226	0.3432
Baiyangdian	201507	0.002022	6.244	7.5	27.2	8.134	2.02	1.3616	3.864	0.1544
Baiyangdian	201508	0.003502	4.264	7.42	27.58	8.11	1.98	2.9978	5.548	0.3134
Baiyangdian	201509	0.003764	8.264	6.34	25.44	8.222	1.48	1.9156	5.14	0.31
Baiyangdian	201510	0.003066	8.384	6.96	19.7	8.272	1.68	1.5296	3.958	0.316
Baiyangdian	201511	0.002866	6.31	5.42	12.98	8.258	3.5	3.174	5.572	0.2934
Baiyangdian	201512	0.00249333	14.0333	6.9	3.26667	8.00333	2.33333	0.547333	1.96333	0.0556667
Baiyangdian	201602	0.00211	7.62	7.72		8.2	1.28	1.0096	4.924	0.2058
Baiyangdian	201603	0.002042	14	7	8.66	7.92	2	0.6872	4.3766	0.2326
Baiyangdian	201604	0.002088	12.24	7.46	17.16	8.46	2.06	0.1818	3.094	0.0344
Baiyangdian	201605	0.001936	8.62	9.16	20.18	8.58	3.46	0.3052	1.972	0.1474
Baiyangdian	201606	0.001942	8.36	9.14	24.8	8	3.14	0.3002	1.948	0.1218
Baiyangdian	201607	0.001896	6.166	8.58	26.38	7.696	3.12	0.7958	2.988	0.227
Baiyangdian	201608	0.001874	4.862	8.1	30.16	7.872	2.34	0.3658	2.828	0.1662
Baiyangdian	201609	0.001946	5.964	9.98	26.08	7.634	2.68	0.336	1.8496	0.1876
Baiyangdian	201610	0.001954	4.966	7.8	19.4	7.836	2.96	0.2588	2.6408	0.1362
Baiyangdian	201611	0.00198	8.652	7.06	11.02	7.938	1.4	0.2384	3.4696	0.1886
Baiyangdian	201612	0.002058	8.876	6.1	4.52	7.844	4.84	1.421	4.6812	0.0992
YuqiaoR	200703	0.00101	17.17	3	1	7.71	1	0.025	2.27	0.01
YuqiaoR	200704	0.00147	11.94	3.2	4.6	7.11	1	0.07	2.32	0.005
YuqiaoR	200705	0.00135	11.83	2.7	19.3	8.37	2.6	0.06	1.4	0.02
YuqiaoR	200706	0.00499	10.71	3.2	22.1	7.31	1	0.06	1.58	0.02
YuqiaoR	200707	0.0054	7.18	3.1	27.1	8.12	1	0.12	1.08	0.02
YuqiaoR	200708	0.0179	6.29	4.73	26.8	8.58	1	0.025	0.95	0.06
YuqiaoR	200709	0.0118	6.18	4.8	25.7	8.23	1	0.11	1.59	0.04
YuqiaoR	200710	0.0101	6.8	3.7	16.6	8.41	1	0.15	1.69	0.04
YuqiaoR	200711	0.0015	12.67	2.6	2.2	7.18	2.2	0.21	3.06	0.02
YuqiaoR	200804	0.00111	10.62	3.1	3.6	7.35	2	0.1	1.64	0.01
[truncated: 1,203 more rows]
