# Supplementary material for: Spatiotemporal changes in chlorophyll-a concentration in China's lakes and its driving factors
Source: Royal Society of Chemistry journal article supplement (doi:10.1039/d4em00731j), 2025-01-01
Supplement: d4em00731j4.xlsx [file d4em00731j4.xlsx]

## Sheet: S4
LakeName	Longitude	latitude	Trend of Chl-a
BailianheR	115.457	30.6029	Increasing
Baiyangdian	115.956	38.9064	Decreasing
ChaersenR	121.851	46.3294	Decreasing
ChaoL	117.379	31.5559	Decreasing
Chenghai	100.67	26.5449	Decreasing
DaguangbaR	109.01	18.9958	Decreasing
DahuofangR	124.117	41.8882	Increasing
DamingL	117.031	36.6812	Decreasing
Dianchi	102.649	24.9892	No change
DianshanL	120.896	31.1213	Increasing
DongL	121.189	28.9984	No change
DongjiangR	113.409	25.9191	No change
DongpingL	116.221	35.9401	Increasing
DongpuR	117.218	31.8928	Increasing
DongtingL	112.541	28.8124	No change
Erhai	100.168	25.8589	Decreasing
FushuiR	114.72	29.6676	No change
FutouL	114.221	30.0558	Increasing
FuxianL	102.852	24.5951	No change
GaoyouL	119.162	32.7734	No change
GeheyanR	110.914	30.443	No change
HongL	113.368	29.8661	Decreasing
HongzeL	118.723	33.1475	Increasing
KunmingL	116.281	40.0022	No change
LaoshanR	120.503	36.262	No change
LiangziL	114.499	30.2449	Increasing
LongganL	116.151	29.9365	Increasing
LuomaL	118.145	34.0442	No change
MenlouR	121.201	37.4331	No change
MopanshanR	127.683	44.3944	Decreasing
NansiL	116.67	35.1904	Increasing
PoyangL	116.373	28.9494	Decreasing
SonghuaL	126.722	43.6718	Increasing
SongtaoL	109.569	19.3987	Decreasing
TaiL	120.145	31.4093	No change
TaipingL	118.026	30.3743	No change
WabuL	116.876	32.5475	Increasing
WuchangL	116.688	30.2729	No change
XiaolangdiR	112.055	35.0629	Increasing
XiashanR	119.459	36.4347	No change
XiL	120.142	30.2557	No change
XuanwuL	118.8	32.0786	No change
Yangzonghai	103.019	24.9342	Decreasing
YuqiaoR	117.559	40.0444	Increasing
