# Supplementary material for: Spatiotemporal changes in chlorophyll-a concentration in China's lakes and its driving factors
Source: Royal Society of Chemistry journal article supplement (doi:10.1039/d4em00731j), 2025-01-01
Supplement: d4em00731j5.xlsx [file d4em00731j5.xlsx]

## Sheet: S5
Year	COD(％)	NH3N(％)	Air Temperature(℃)	Reference
2007	-3.2		1.3	https://www.cnemc.cn/jcbg/zghjzkgb/200712/t20071231_646738.shtml
2008	-4.42		0.7	https://www.cnemc.cn/jcbg/zghjzkgb/200811/t20081125_646739.shtml
2009	-3.27		1	https://www.cnemc.cn/jcbg/zghjzkgb/200911/t20091126_646740.shtml
2010	-3.09		0.7	https://www.cnemc.cn/jcbg/zghjzkgb/201006/t20100608_646741.shtml
2011	-2.04	-1.52	0.5	https://www.cnemc.cn/jcbg/zghjzkgb/201206/t20120613_646742.shtml
2012	-3.05	-2.62	-0.3	https://www.cnemc.cn/jcbg/zghjzkgb/201306/t20130606_646743.shtml
2013	-2.9	-3.1	0.8	https://www.cnemc.cn/jcbg/zghjzkgb/201706/t20170606_646747.shtml
2014	-2.47	-2.9	0.5	https://www.cnemc.cn/jcbg/zghjzkgb/201706/t20170605_646745.shtml
2015	-3.1	-3.6	0.95	https://www.cnemc.cn/jcbg/zghjzkgb/201706/t20170605_646746.shtml
